# Supplementary material for: Rainbow Trout Erythrocytes ex vivo Transfection With a DNA Vaccine Encoding VHSV Glycoprotein G Induces an Antiviral Immune Response
Source: Front Immunol. 2018 Oct 29;9:2477. doi: 10.3389/fimmu.2018.02477 (PMC6220650; doi:10.3389/fimmu.2018.02477)
Supplement: Supplementary file 1 [file Table_1.xlsx]

## Sheet: RNAseq Single Cell
Table S1
Symbol	Gene description	Log₂ fold change	Fold change	P-value	FDR p-value
FAM192A	family with sequence similarity 192 member A	18.0485	271113	4.86304e-08	0.000119356
SEC22A	SEC22 homolog A, vesicle trafficking protein	17.976	257818	3.03852e-08	8.95994e-05
CALM3	calmodulin 3	16.5898	98636.9	4.18781e-07	0.000452409
SVIP	small VCP interacting protein	16.4664	90547.5	7.68484e-11	5.28118e-06
RPLP2	ribosomal protein lateral stalk subunit P2	16.2912	80193.1	6.4691e-07	0.000577363
SETD2	SET domain containing 2	16.0483	67765	8.37732e-08	0.00017714
CCDC24	coiled-coil domain containing 24	15.9841	64816	9.05558e-08	0.000185767
ATP5MF	ATP synthase membrane subunit f	15.8338	58403.4	1.27875e-06	0.000825149
EHD1	EH domain containing 1	15.803	57172	7.78528e-07	0.000625842
CXORF67	chromosome X open reading frame 67	15.7423	54814.7	1.42572e-06	0.000898887
TTC1	tetratricopeptide repeat domain 1	15.6631	51887.3	1.05724e-09	1.03794e-05
SMAP1	small ArfGAP 1	15.631	50746	1.60719e-07	0.000264121
EMC8	ER membrane protein complex subunit 8	15.3369	41386.3	2.07453e-10	5.70264e-06
PSMA4	proteasome subunit alpha 4	14.9433	31504.7	3.14625e-09	2.05921e-05
NKIRAS2	NFKB inhibitor interacting Ras like 2	14.8831	30218.3	3.54817e-06	0.00150983
MAGI2	membrane associated guanylate kinase, WW and PDZ domain containing 2	14.8146	28815.5	4.82679e-06	0.00179787
CSPG5	chondroitin sulfate proteoglycan 5	14.7986	28498.4	3.35733e-08	8.95994e-05
GABRA6	gamma-aminobutyric acid type A receptor alpha6 subunit	14.7487	27529.3	5.17884e-06	0.0018781
FNDC7	fibronectin type III domain containing 7	14.7391	27347.1	7.78637e-07	0.000625842
DNAH6	dynein axonemal heavy chain 6	14.7348	27266.4	2.80065e-06	0.00132736
DLX6	distal-less homeobox 6	14.4182	21893.2	1.86007e-10	5.70264e-06
BTF3L4	basic transcription factor 3 like 4	14.2585	19598.9	9.93904e-06	0.00276092
ZP4	zona pellucida glycoprotein 4	14.2132	18993.9	1.02721e-05	0.00279165
ADGRE2	adhesion G protein-coupled receptor E2	14.2032	18862	8.27496e-06	0.00247787
ULK4	unc-51 like kinase 4	14.1979	18793.4	6.52954e-06	0.00216252
TSPO	translocator protein	14.1861	18640.1	5.55077e-06	0.00197511
DNAJC3	DnaJ heat shock protein family (Hsp40) member C3	14.1354	17996.6	2.45292e-06	0.0012181
ZNF174	zinc finger protein 174	14.0711	17211.2	9.48558e-06	0.00268258
SLITRK3	SLIT and NTRK like family member 3	14.062	17103	1.17664e-05	0.00301772
XIRP2	xin actin binding repeat containing 2	14.051	16973.6	8.03912e-06	0.0024322
NCALD	neurocalcin delta	14.0289	16715.4	1.33539e-05	0.00323136
SHKBP1	SH3KBP1 binding protein 1	13.9778	16133.7	7.76294e-06	0.00239231
FLNA	filamin A	13.9373	15687.1	1.3501e-05	0.00325186
HSPE1	heat shock protein family E (Hsp10) member 1	13.8525	14791.3	1.62782e-05	0.00357975
GPATCH8	G-patch domain containing 8	13.8244	14506.2	1.69299e-05	0.00365292
SLC45A3	solute carrier family 45 member 3	13.7884	14149.2	1.77503e-05	0.00375912
ADGRL1	adhesion G protein-coupled receptor L1	13.7797	14063.7	1.79269e-05	0.00377906
UBN2	ubinuclein 2	13.7664	13935.2	1.65525e-05	0.00360583
SPRR3	small proline rich protein 3	13.7649	13920.1	3.34072e-08	8.95994e-05
RNASEH2A	ribonuclease H2 subunit A	13.7393	13675.4	1.44993e-05	0.0033777
RPS6KA6	ribosomal protein S6 kinase A6	13.729	13578.1	1.70869e-05	0.00366951
COL5A1	collagen type V alpha 1 chain	13.682	13142.7	2.03478e-05	0.00405904
S1PR3	sphingosine-1-phosphate receptor 3	13.6721	13053	1.1248e-05	0.00293352
TUBA4A	tubulin alpha 4a	13.6509	12863	2.98945e-07	0.000374251
FAM13A	family with sequence similarity 13 member A	13.6371	12740.4	1.7103e-08	6.52973e-05
ATP23	ATP23 metallopeptidase and ATP synthase assembly factor homolog	13.6336	12709.5	1.363e-05	0.00326517
DDI2	DNA damage inducible 1 homolog 2	13.5661	12128.7	2.04644e-05	0.0040618
SFXN5	sideroflexin 5	13.5035	11613.5	2.00725e-05	0.00403339
NT5E	5'-nucleotidase ecto	13.415	10922.5	7.90331e-10	9.05219e-06
ROBO3	roundabout guidance receptor 3	13.4033	10833.9	1.69793e-09	1.37277e-05
GOLGA1	golgin A1	13.3758	10629.4	5.31369e-10	7.30335e-06
C21orf91	chromosome 21 open reading frame 91	13.3449	10404.2	1.95536e-05	0.00398743
BCL7A	BCL tumor suppressor 7A	13.2727	9896.78	1.45987e-05	0.00338516
SCLT1	sodium channel and clathrin linker 1	13.2533	9763.98	2.09495e-05	0.00413135
CELA1	chymotrypsin like elastase family member 1	13.2242	9569.17	2.04032e-05	0.0040618
TELO2	telomere maintenance 2	13.1722	9230.43	2.23792e-05	0.00425434
ARHGEF39	Rho guanine nucleotide exchange factor 39	13.1666	9194.48	2.41953e-05	0.00442908
GRID1	glutamate ionotropic receptor delta type subunit 1	13.1644	9180.62	2.35884e-05	0.00438119
CD22	CD22 molecule	13.1602	9154.12	2.66537e-07	0.00035225
IL2RB	interleukin 2 receptor subunit beta	13.1584	9142.69	2.75146e-05	0.00476633
PACSIN1	protein kinase C and casein kinase substrate in neurons 1	13.1176	8887.88	3.74972e-05	0.00579074
PKD1L2	polycystin 1 like 2 (gene/pseudogene)	13.1074	8825.25	2.7904e-05	0.0048121
ST3GAL3	ST3 beta-galactoside alpha-2,3-sialyltransferase 3	13.103	8798.03	2.20515e-05	0.00420951
TAGLN2	transgelin 2	13.0429	8439.44	3.68099e-05	0.00571672
ZFYVE27	zinc finger FYVE-type containing 27	12.9971	8175.75	2.68484e-05	0.00472491
NUGGC	nuclear GTPase, germinal center associated	12.9909	8140.41	3.1822e-05	0.00521926
ITM2B	integral membrane protein 2B	12.9735	8043.08	4.60705e-10	7.03569e-06
LPAR6	lysophosphatidic acid receptor 6	12.9735	8042.91	4.02031e-05	0.00603339
SUV39H1	suppressor of variegation 3-9 homolog 1	12.9679	8011.71	1.9842e-05	0.00402236
GJB3	gap junction protein beta 3	12.9547	7938.59	4.04348e-10	7.03569e-06
SIDT2	SID1 transmembrane family member 2	12.9179	7738.68	4.72579e-05	0.00662112
CSNK1G1	casein kinase 1 gamma 1	12.9074	7682.85	5.32449e-07	0.000515366
MUS81	MUS81 structure-specific endonuclease subunit	12.8874	7576.76	4.40396e-05	0.00634484
PSME3	proteasome activator subunit 3	12.8861	7569.88	1.86941e-07	0.000285488
PDE6G	phosphodiesterase 6G	12.8591	7429.52	2.29011e-07	0.000331328
BRMS1	BRMS1, transcriptional repressor and anoikis regulator	12.859	7429.2	2.98065e-05	0.00500872
GLRX2	glutaredoxin 2	12.8539	7403.03	4.97469e-05	0.00686487
TENT5C	terminal nucleotidyltransferase 5C	12.8213	7237.7	2.90657e-05	0.00494419
TNFAIP2	TNF alpha induced protein 2	12.8137	7199.78	3.49233e-05	0.005562
GCH1	GTP cyclohydrolase 1	12.7992	7127.41	2.90357e-05	0.00494419
RBP2	retinol binding protein 2	12.7503	6889.91	2.04029e-08	7.19831e-05
UHMK1	U2AF homology motif kinase 1	12.7494	6885.92	2.47299e-06	0.00121827
RPA3	replication protein A3	12.7455	6866.94	5.6431e-05	0.00737708
MAST1	microtubule associated serine/threonine kinase 1	12.7217	6754.75	4.82231e-05	0.00669492
HAVCR1	hepatitis A virus cellular receptor 1	12.7047	6675.65	5.83682e-05	0.00753273
EIF2B4	eukaryotic translation initiation factor 2B subunit delta	12.6916	6615.16	5.88411e-05	0.00758555
RPS17	ribosomal protein S17	12.689	6603.52	4.60672e-05	0.00654015
CCDC88A	coiled-coil domain containing 88A	12.6889	6602.82	4.30062e-10	7.03569e-06
CCHCR1	coiled-coil alpha-helical rod protein 1	12.6883	6600.09	1.50995e-05	0.00344739
FAM149B1	family with sequence similarity 149 member B1	12.6404	6384.8	4.58975e-08	0.000114697
DGAT1	diacylglycerol O-acyltransferase 1	12.6392	6379.38	3.93568e-05	0.0059838
ZNHIT3	zinc finger HIT-type containing 3	12.629	6334.4	4.08676e-05	0.00606614
CRYGN	crystallin gamma N	12.6057	6233.12	5.41501e-05	0.00723286
SASH1	SAM and SH3 domain containing 1	12.602	6217.04	4.37539e-05	0.00633141
FGF13	fibroblast growth factor 13	12.5811	6127.46	3.97831e-07	0.000440964
RALGPS2	Ral GEF with PH domain and SH3 binding motif 2	12.5696	6078.85	5.09056e-05	0.00696899
TRDN	triadin	12.553	6009.28	1.10949e-06	0.000774076
TMEM230	transmembrane protein 230	12.544	5972.09	3.28727e-05	0.0053343
MMP13	matrix metallopeptidase 13	12.524	5889.86	1.10708e-06	0.000774076
FAM234B	family with sequence similarity 234 member B	12.5217	5880.27	4.84318e-05	0.00671035
TMEM117	transmembrane protein 117	12.5131	5845.45	4.12128e-05	0.00609736
PREP	prolyl endopeptidase	12.5079	5824.29	3.35316e-05	0.00541074
KCNG1	potassium voltage-gated channel modifier subfamily G member 1	12.5031	5805.23	3.34712e-08	8.95994e-05
FUT9	fucosyltransferase 9	12.4889	5748.39	4.24725e-05	0.00623008
SEPT5	septin 5	12.464	5650	5.30443e-05	0.00712671
PPFIA3	PTPRF interacting protein alpha 3	12.4452	5576.58	1.9081e-05	0.00393188
RPS23	ribosomal protein S23	12.4253	5500.21	7.78301e-05	0.00898931
PLEKHB2	pleckstrin homology domain containing B2	12.4168	5468.02	2.70124e-05	0.00472604
RPL37	ribosomal protein L37	12.415	5461.31	7.9049e-05	0.00904079
MTCL1	microtubule crosslinking factor 1	12.4059	5426.7	1.20793e-06	0.000798485
RRAGC	Ras related GTP binding C	12.4016	5410.56	4.10114e-09	2.45077e-05
ETV4	ETS variant 4	12.3971	5393.68	3.27604e-06	0.00144318
PRKACA	protein kinase cAMP-activated catalytic subunit alpha	12.3834	5342.8	2.1489e-05	0.00416078
EDNRB	endothelin receptor type B	12.375	5311.98	6.31477e-07	0.000569608
RPS12	ribosomal protein S12	12.3737	5306.95	3.27242e-06	0.00144318
SLC39A5	solute carrier family 39 member 5	12.3714	5298.77	1.91913e-09	1.46541e-05
ART2B	ADP-ribosyltransferase 2b	12.3603	5257.89	8.46771e-05	0.00944917
TENM2	teneurin transmembrane protein 2	12.3532	5232.18	3.63297e-06	0.00153169
DPP10	dipeptidyl peptidase like 10	12.3497	5219.49	3.59734e-05	0.00563054
LITAF	lipopolysaccharide induced TNF factor	12.3453	5203.66	1.64866e-06	0.000996386
CASQ1	calsequestrin 1	12.345	5202.62	3.74496e-05	0.0057899
EXOC3L1	exocyst complex component 3 like 1	12.3241	5127.56	2.43931e-05	0.00443477
ZW10	zw10 kinetochore protein	12.3077	5069.65	2.09453e-06	0.0011081
KDM4A	lysine demethylase 4A	12.2996	5041.43	4.13847e-05	0.00611621
ITGA11	integrin subunit alpha 11	12.2919	5014.67	6.34178e-05	0.00790245
ATP2B3	ATPase plasma membrane Ca2+ transporting 3	12.2837	4986.14	9.10528e-05	0.00983857
KSR1	kinase suppressor of ras 1	12.2679	4931.79	9.31441e-05	0.00990385
PIAS3	protein inhibitor of activated STAT 3	12.2663	4926.47	2.40223e-06	0.0012181
AKAP12	A-kinase anchoring protein 12	12.2553	4888.94	7.26577e-05	0.00862739
ZNF236	zinc finger protein 236	12.2518	4877.06	3.97426e-05	0.00599604
TBC1D2	TBC1 domain family member 2	12.2513	4875.42	5.7724e-05	0.00748758
PTGER1	prostaglandin E receptor 1	12.2512	4875.08	9.53385e-05	0.0100121
TAOK3	TAO kinase 3	12.2314	4808.43	7.82064e-05	0.00900251
MED27	mediator complex subunit 27	12.2293	4801.71	8.93726e-07	0.00068243
MBNL1	muscleblind like splicing regulator 1	12.2201	4771.1	9.92182e-05	0.0102176
PHF21A	PHD finger protein 21A	12.2172	4761.36	5.27685e-05	0.0071156
PDE10A	phosphodiesterase 10A	12.2124	4745.81	1.18305e-06	0.000797075
GPR20	G protein-coupled receptor 20	12.1762	4627.95	9.64135e-05	0.0100695
ETS1	ETS proto-oncogene 1, transcription factor	12.164	4588.96	2.91348e-05	0.00494982
GNL1	G protein nucleolar 1 (putative)	12.1476	4537.14	0.000108029	0.0106973
ZNF687	zinc finger protein 687	12.1461	4532.42	0.000108392	0.0107101
MBTD1	mbt domain containing 1	12.14	4513.32	0.00010825	0.0107086
FAM19A2	family with sequence similarity 19 member A2, C-C motif chemokine like	12.135	4497.74	0.000100101	0.0102673
SYT3	synaptotagmin 3	12.125	4466.62	3.12216e-05	0.00515153
SUCLG1	succinate-CoA ligase alpha subunit	12.1227	4459.64	2.36718e-06	0.00121401
HERC2	HECT and RLD domain containing E3 ubiquitin protein ligase 2	12.1211	4454.67	8.81856e-05	0.00965968
EVL	Enah/Vasp-like	12.1171	4442.29	8.1732e-05	0.00925614
CCK	cholecystokinin	12.1164	4440.25	0.00011113	0.0109257
JMJD1C	jumonji domain containing 1C	12.1046	4404.08	3.01906e-05	0.00504807
ENKD1	enkurin domain containing 1	12.071	4302.61	7.27333e-05	0.00862739
GPR19	G protein-coupled receptor 19	12.066	4287.65	6.71168e-05	0.00818527
VBP1	VHL binding protein 1	12.0585	4265.61	9.18989e-05	0.0098609
BMF	Bcl2 modifying factor	12.0497	4239.56	0.000117002	0.0112929
PLCD3	phospholipase C delta 3	12.0409	4213.83	6.8885e-05	0.00834906
SORCS1	sortilin related VPS10 domain containing receptor 1	12.0254	4168.69	6.10157e-05	0.00772926
SOCS3	suppressor of cytokine signaling 3	12.0169	4144.15	6.21643e-05	0.00780997
CYTH3	cytohesin 3	11.9983	4091.15	0.000124188	0.011758
GPT2	glutamic--pyruvic transaminase 2	11.9969	4087.13	2.46377e-06	0.0012181
ZNF835	zinc finger protein 835	11.9845	4052.25	0.000126939	0.011893
UBAC1	UBA domain containing 1	11.9821	4045.57	0.000128269	0.0119504
MYLPF	myosin light chain, phosphorylatable, fast skeletal muscle	11.9523	3962.91	0.000131795	0.0121086
FGD5	FYVE, RhoGEF and PH domain containing 5	11.94	3929.04	3.89206e-05	0.00594286
NRP2	neuropilin 2	11.9297	3901.18	1.19759e-06	0.000798485
CHPF2	chondroitin polymerizing factor 2	11.9106	3850	5.5017e-05	0.00726561
SLC25A36	solute carrier family 25 member 36	11.9015	3825.76	0.000141329	0.0126556
SPEF1	sperm flagellar 1	11.882	3774.42	8.93561e-07	0.00068243
NUP210	nucleoporin 210	11.8797	3768.3	8.94203e-05	0.00974137
PDE4C	phosphodiesterase 4C	11.8747	3755.34	9.71216e-05	0.0100966
PLA2G12B	phospholipase A2 group XIIB	11.8734	3751.97	5.20587e-05	0.00708431
DUOX1	dual oxidase 1	11.8721	3748.6	8.53471e-05	0.00945576
TNIP1	TNFAIP3 interacting protein 1	11.8649	3729.76	1.62457e-06	0.000988715
CUEDC1	CUE domain containing 1	11.862	3722.35	4.07055e-05	0.00606201
OPN1LW	opsin 1, long wave sensitive	11.8562	3707.34	0.000135484	0.0123485
SSTR1	somatostatin receptor 1	11.8537	3700.94	9.83835e-05	0.0101978
HSP90AA1	heat shock protein 90 alpha family class A member 1	11.8475	3685.03	2.00794e-07	0.000300723
PPM1F	protein phosphatase, Mg2+/Mn2+ dependent 1F	11.8078	3585.04	0.000102442	0.0103988
STUM	stum, mechanosensory transduction mediator homolog	11.8073	3583.79	9.9318e-05	0.0102176
AQP1	aquaporin 1 (Colton blood group)	11.8049	3578.02	0.000107366	0.0106547
HSP90B1	heat shock protein 90 beta family member 1	11.8	3565.88	8.47543e-07	0.000662707
BRD7	bromodomain containing 7	11.7904	3542.02	9.90715e-05	0.0102176
BRD8	bromodomain containing 8	11.7887	3537.83	0.000119038	0.0114173
NUCB1	nucleobindin 1	11.7846	3527.95	0.000158444	0.0135012
MC3R	melanocortin 3 receptor	11.7832	3524.47	9.86321e-05	0.0102158
PSG2	pregnancy specific beta-1-glycoprotein 2	11.778	3511.87	0.000159066	0.0135289
APMAP	adipocyte plasma membrane associated protein	11.7549	3455.96	0.000153256	0.0132496
IMPG1	interphotoreceptor matrix proteoglycan 1	11.7365	3412.12	0.000164968	0.0138593
NUDT4	nudix hydrolase 4	11.7358	3410.59	0.000102323	0.0103967
SYT2	synaptotagmin 2	11.7306	3398.41	0.00015866	0.0135027
GSDME	gasdermin E	11.7299	3396.6	8.94445e-05	0.00974137
SPRY4	sprouty RTK signaling antagonist 4	11.7098	3349.72	8.34066e-05	0.0093658
SELENON	selenoprotein N	11.7094	3348.76	6.65289e-05	0.00814651
RASGRP3	RAS guanyl releasing protein 3	11.6715	3261.88	2.91341e-06	0.00135281
CABCOCO1	ciliary associated calcium binding coiled-coil 1	11.6615	3239.28	4.21324e-07	0.000452409
ZKSCAN8	zinc finger with KRAB and SCAN domains 8	11.6595	3234.85	0.000170626	0.0141274
DEPTOR	DEP domain containing MTOR interacting protein	11.64	3191.42	7.51207e-05	0.00879292
STON2	stonin 2	11.6378	3186.58	3.37117e-06	0.00146166
YBX1	Y-box binding protein 1	11.6304	3170.33	0.000181217	0.0146945
SRPK3	SRSF protein kinase 3	11.6265	3161.68	0.000182011	0.014708
RBM27	RNA binding motif protein 27	11.617	3141.06	1.27174e-06	0.000825149
SLC7A6OS	solute carrier family 7 member 6 opposite strand	11.6127	3131.71	6.8229e-06	0.00221694
CLTCL1	clathrin heavy chain like 1	11.6077	3120.88	1.819e-06	0.00104171
MOG	myelin oligodendrocyte glycoprotein	11.6054	3115.73	5.09192e-08	0.000122781
CARM1	coactivator associated arginine methyltransferase 1	11.5885	3079.53	0.000159569	0.0135549
EIF4E2	eukaryotic translation initiation factor 4E family member 2	11.5818	3065.27	7.25837e-07	0.000619639
FAAH2	fatty acid amide hydrolase 2	11.5681	3036.39	1.78574e-06	0.00103906
ARG2	arginase 2	11.5665	3033.04	0.000139262	0.0125461
NFAT5	nuclear factor of activated T cells 5	11.5591	3017.36	0.000194379	0.0152938
RMC1	regulator of MON1-CCZ1	11.5474	2993.06	0.000196837	0.0153979
FAM110B	family with sequence similarity 110 member B	11.5384	2974.39	0.000148883	0.0129921
DEF6	DEF6, guanine nucleotide exchange factor	11.5228	2942.53	8.71442e-05	0.00960906
SLIT3	slit guidance ligand 3	11.5096	2915.6	0.000157032	0.0134224
ELAVL4	ELAV like RNA binding protein 4	11.5094	2915.23	0.000203077	0.0157072
PLXNA1	plexin A1	11.5054	2907.07	8.23825e-05	0.00929749
TNFRSF21	TNF receptor superfamily member 21	11.5038	2903.97	8.50819e-05	0.00944993
PTPN21	protein tyrosine phosphatase, non-receptor type 21	11.4994	2895.05	0.000206641	0.0158533
SLC50A1	solute carrier family 50 member 1	11.4987	2893.61	0.000206968	0.0158533
AATF	apoptosis antagonizing transcription factor	11.4966	2889.5	0.000138418	0.0125162
CRLF1	cytokine receptor like factor 1	11.4953	2886.92	5.68952e-06	0.00197698
PCBP2	poly(rC) binding protein 2	11.4934	2883.18	0.000155745	0.0133872
SH3BGRL3	SH3 domain binding glutamate rich protein like 3	11.4885	2873.27	7.53336e-05	0.00879292
TMEM63B	transmembrane protein 63B	11.4711	2838.84	0.000214895	0.0159982
FBXO11	F-box protein 11	11.4678	2832.46	0.000121688	0.0115826
GABRR1	gamma-aminobutyric acid type A receptor rho1 subunit	11.4595	2816.09	0.000180915	0.0146845
RUNX3	runt related transcription factor 3	11.4536	2804.73	0.000206939	0.0158533
C1QB	complement C1q B chain	11.437	2772.62	8.7781e-05	0.00964426
HEY2	hes related family bHLH transcription factor with YRPW motif 2	11.4367	2772.01	4.8194e-06	0.00179787
PRB1	proline rich protein BstNI subfamily 1	11.4222	2744.25	5.5613e-06	0.00197511
RHBDF2	rhomboid 5 homolog 2	11.4146	2729.93	8.51933e-07	0.000662707
TAGAP	T cell activation RhoGTPase activating protein	11.4006	2703.54	9.91389e-05	0.0102176
BCO1	beta-carotene oxygenase 1	11.3984	2699.39	8.96524e-05	0.00974238
OGT	O-linked N-acetylglucosamine (GlcNAc) transferase	11.3974	2697.43	0.000115209	0.0112065
AUP1	AUP1, lipid droplet regulating VLDL assembly factor	11.3964	2695.61	0.000132487	0.0121478
PRG4	proteoglycan 4	11.3804	2665.88	0.000239993	0.0170668
PCARE	photoreceptor cilium actin regulator	11.3754	2656.62	0.000148012	0.0129658
SH3TC2	SH3 domain and tetratricopeptide repeats 2	11.373	2652.27	0.000163413	0.0137708
SEPHS1	selenophosphate synthetase 1	11.3651	2637.69	1.15266e-07	0.00021409
SPAG17	sperm associated antigen 17	11.3568	2622.6	0.000210476	0.0159036
RARA	retinoic acid receptor alpha	11.353	2615.69	9.24971e-05	0.00987696
MAG	myelin associated glycoprotein	11.352	2613.88	2.56145e-06	0.00123964
PLA2G3	phospholipase A2 group III	11.3335	2580.58	0.000207527	0.0158533
PKD2	polycystin 2, transient receptor potential cation channel	11.3324	2578.68	0.000197843	0.0154414
FYB1	FYN binding protein 1	11.3279	2570.54	0.000255697	0.0176426
MPHOSPH9	M-phase phosphoprotein 9	11.3183	2553.49	3.07832e-06	0.00140563
SRRM1	serine and arginine repetitive matrix 1	11.2978	2517.57	8.26658e-05	0.00931305
SMU1	SMU1, DNA replication regulator and spliceosomal factor	11.2952	2512.93	0.000208025	0.0158579
LDB3	LIM domain binding 3	11.2861	2497.25	0.000266126	0.0181166
APBB2	amyloid beta precursor protein binding family B member 2	11.2852	2495.73	0.000247695	0.0173518
VTG1	vitellogenin 1	11.2836	2492.91	0.000263974	0.0180505
TPM3	tropomyosin 3	11.2765	2480.7	0.000265317	0.0180987
ZNF239	zinc finger protein 239	11.2761	2480	0.000119803	0.0114737
EIF2S1	eukaryotic translation initiation factor 2 subunit alpha	11.273	2474.58	2.34647e-06	0.00121244
XKR8	XK related 8	11.272	2472.85	0.000147766	0.0129608
TEAD1	TEA domain transcription factor 1	11.2687	2467.28	0.000202036	0.0156729
MDGA1	MAM domain containing glycosylphosphatidylinositol anchor 1	11.2598	2452.1	1.77162e-06	0.00103616
PBLD	phenazine biosynthesis like protein domain containing	11.2479	2432.04	0.000228823	0.0166053
PARP15	poly(ADP-ribose) polymerase family member 15	11.2373	2414.11	9.71462e-05	0.0100966
VASH2	vasohibin 2	11.2281	2398.87	0.000147438	0.0129486
SLC19A3	solute carrier family 19 member 3	11.2208	2386.67	0.000267473	0.0181454
TRIM8	tripartite motif containing 8	11.2177	2381.59	9.05717e-05	0.00980199
RPSA	ribosomal protein SA	11.2167	2379.9	4.2515e-06	0.00168212
FBXW7	F-box and WD repeat domain containing 7	11.2038	2358.67	9.96018e-05	0.0102266
RALY	RALY heterogeneous nuclear ribonucleoprotein	11.1932	2341.46	0.00013529	0.0123443
REEP2	receptor accessory protein 2	11.1888	2334.41	2.45585e-06	0.0012181
ZNF572	zinc finger protein 572	11.185	2328.24	5.50376e-06	0.00196483
ABI1	abl interactor 1	11.1698	2303.8	0.000252652	0.0175382
FAM186A	family with sequence similarity 186 member A	11.1671	2299.52	0.000107812	0.0106836
SWSAP1	SWIM-type zinc finger 7 associated protein 1	11.1636	2293.91	0.000300058	0.0192626
FAM163A	family with sequence similarity 163 member A	11.1495	2271.54	0.000294252	0.0190681
MYH9	myosin heavy chain 9	11.1477	2268.82	0.000128334	0.0119504
WNT2B	Wnt family member 2B	11.1465	2266.94	0.000106153	0.0106187
INPP5J	inositol polyphosphate-5-phosphatase J	11.1444	2263.58	0.000153644	0.0132648
ANXA2	annexin A2	11.1417	2259.39	0.00030809	0.019478
SNX1	sorting nexin 1	11.1292	2239.89	0.000257591	0.0177199
RPL30	ribosomal protein L30	11.1183	2222.96	9.98073e-06	0.00276288
CLMN	calmin	11.1176	2221.89	0.000236124	0.0169359
MYH6	myosin heavy chain 6	11.112	2213.26	0.000316964	0.0197422
TPD52L2	tumor protein D52 like 2	11.1095	2209.55	0.00022019	0.0162365
PBXIP1	PBX homeobox interacting protein 1	11.1059	2203.97	0.000204376	0.0157456
MAP3K14	mitogen-activated protein kinase kinase kinase 14	11.1054	2203.2	0.000180987	0.0146845
LTV1	LTV1 ribosome biogenesis factor	11.0946	2186.77	1.73844e-05	0.00370448
SLC5A10	solute carrier family 5 member 10	11.0815	2167.06	1.56964e-05	0.00354798
PATL1	PAT1 homolog 1, processing body mRNA decay factor	11.0757	2158.26	0.000209958	0.0158945
JPH2	junctophilin 2	11.0753	2157.67	6.11781e-07	0.00056057
WDR53	WD repeat domain 53	11.0683	2147.32	0.000326252	0.0199987
PARP14	poly(ADP-ribose) polymerase family member 14	11.0661	2144.06	0.000329712	0.0200695
CELA2B	chymotrypsin like elastase family member 2B	11.0519	2122.98	0.000121522	0.0115748
CREB5	cAMP responsive element binding protein 5	11.0449	2112.79	1.6184e-06	0.000988715
SLC31A1	solute carrier family 31 member 1	11.0428	2109.68	0.000210744	0.0159145
PARD6G	par-6 family cell polarity regulator gamma	11.035	2098.26	6.41966e-08	0.000145512
NADSYN1	NAD synthetase 1	11.0343	2097.3	9.27996e-06	0.00264074
SOX8	SRY-box 8	11.0248	2083.47	0.000349761	0.0207567
PPRC1	peroxisome proliferator-activated receptor gamma, coactivator-related 1	11.0133	2066.93	0.000209117	0.0158945
APOOL	apolipoprotein O like	11.01	2062.18	0.000355503	0.0209064
TNRC6C	trinucleotide repeat containing 6C	11.0064	2057.17	3.32462e-06	0.00145181
CNNM3	cyclin and CBS domain divalent metal cation transport mediator 3	10.9983	2045.63	0.000363184	0.0211784
MAST3	microtubule associated serine/threonine kinase 3	10.991	2035.21	0.000353477	0.020871
H2AFV	H2A histone family member V	10.99	2033.81	0.000368122	0.0213486
MYO7A	myosin VIIA	10.9877	2030.63	5.27052e-06	0.00189634
UTS2R	urotensin 2 receptor	10.9849	2026.65	0.00027869	0.0185416
NBAS	neuroblastoma amplified sequence	10.9748	2012.53	0.000373422	0.0215001
URM1	ubiquitin related modifier 1	10.9718	2008.4	0.00027266	0.0183523
GPCPD1	glycerophosphocholine phosphodiesterase 1	10.9612	1993.61	0.000377377	0.0216027
TMEM185A	transmembrane protein 185A	10.9611	1993.51	1.02192e-06	0.000743158
ANKRD52	ankyrin repeat domain 52	10.9606	1992.81	0.000280816	0.0186276
AP1S3	adaptor related protein complex 1 subunit sigma 3	10.9425	1967.93	2.07136e-06	0.0011081
FCRL5	Fc receptor like 5	10.9368	1960.23	2.7645e-06	0.001326
LAMTOR3	late endosomal/lysosomal adaptor, MAPK and MTOR activator 3	10.934	1956.43	0.000377186	0.0216027
MRPL17	mitochondrial ribosomal protein L17	10.9318	1953.41	0.00039177	0.0220456
KCTD20	potassium channel tetramerization domain containing 20	10.9246	1943.67	0.000393816	0.0221019
C1orf198	chromosome 1 open reading frame 198	10.9203	1937.93	0.000299407	0.0192543
XIAP	X-linked inhibitor of apoptosis	10.9196	1936.96	0.000275369	0.0184567
TDP2	tyrosyl-DNA phosphodiesterase 2	10.9122	1927.1	0.000289419	0.0189457
GAN	gigaxonin	10.9115	1926.14	4.7417e-06	0.0017758
SPART	spartin	10.9025	1914.2	0.000281514	0.0186353
GULP1	GULP, engulfment adaptor PTB domain containing 1	10.9021	1913.7	5.03173e-06	0.00184915
SLC16A1	solute carrier family 16 member 1	10.8963	1905.93	3.2318e-06	0.00143641
JAK2	Janus kinase 2	10.8928	1901.3	1.7917e-06	0.00103906
PLCXD1	phosphatidylinositol specific phospholipase C X domain containing 1	10.8835	1889.18	1.43961e-05	0.00336227
PLA2G4C	phospholipase A2 group IVC	10.8764	1879.84	2.60181e-05	0.00463216
PGAM2	phosphoglycerate mutase 2	10.8713	1873.27	1.34293e-05	0.00324389
ARNTL	aryl hydrocarbon receptor nuclear translocator like	10.8603	1858.93	1.02106e-05	0.00279003
ARL8A	ADP ribosylation factor like GTPase 8A	10.8599	1858.46	1.31582e-06	0.000841169
CXXC1	CXXC finger protein 1	10.8544	1851.39	0.000424155	0.023084
TSHZ2	teashirt zinc finger homeobox 2	10.8517	1847.88	0.000312391	0.0196402
TBL1XR1	transducin beta like 1 X-linked receptor 1	10.8509	1846.97	9.55826e-08	0.000193195
MAF1	MAF1 homolog, negative regulator of RNA polymerase III	10.8408	1834.07	0.000346882	0.0206454
SECISBP2L	SECIS binding protein 2 like	10.8364	1828.42	0.00036128	0.0211032
GPR83	G protein-coupled receptor 83	10.8345	1826.04	0.000306004	0.0194265
SYNCRIP	synaptotagmin binding cytoplasmic RNA interacting protein	10.8318	1822.63	5.01473e-06	0.00184784
ZNF510	zinc finger protein 510	10.8306	1821.12	0.00025061	0.0174758
SLC29A1	solute carrier family 29 member 1 (Augustine blood group)	10.8274	1817.04	5.17031e-06	0.0018781
ELF2	E74 like ETS transcription factor 2	10.8127	1798.63	0.000163582	0.0137766
IL16	interleukin 16	10.8084	1793.26	0.000160455	0.0135966
PRKD1	protein kinase D1	10.8081	1792.96	0.000258478	0.017772
IFIT5	interferon induced protein with tetratricopeptide repeats 5	10.8063	1790.65	0.000295659	0.0191321
ARIH1	ariadne RBR E3 ubiquitin protein ligase 1	10.8026	1786.05	1.89202e-05	0.00391048
PAF1	PAF1 homolog, Paf1/RNA polymerase II complex component	10.8005	1783.49	0.000337042	0.0203267
OLR1	oxidized low density lipoprotein receptor 1	10.7994	1782.2	0.000377293	0.0216027
SLC15A1	solute carrier family 15 member 1	10.7936	1774.98	8.84904e-06	0.0025699
ADAM10	ADAM metallopeptidase domain 10	10.7885	1768.69	7.32831e-06	0.00230507
TFDP1	transcription factor Dp-1	10.7884	1768.56	0.000442225	0.0236595
TIMM22	translocase of inner mitochondrial membrane 22	10.7865	1766.31	0.000380484	0.0217083
BCAN	brevican	10.7827	1761.65	0.00034408	0.0205909
ADRA2A	adrenoceptor alpha 2A	10.7808	1759.31	1.04737e-06	0.000749763
TSPAN7	tetraspanin 7	10.7791	1757.28	0.000192448	0.0152129
CST1	cystatin SN	10.7699	1746.12	0.000273531	0.018384
PRPF19	pre-mRNA processing factor 19	10.7685	1744.37	8.5069e-06	0.00252897
VWA7	von Willebrand factor A domain containing 7	10.7634	1738.2	0.000459322	0.024014
LMNB2	lamin B2	10.7628	1737.49	0.000457091	0.0239777
ABCC8	ATP binding cassette subfamily C member 8	10.7363	1705.86	9.83025e-06	0.00275736
GAL3ST1	galactose-3-O-sulfotransferase 1	10.734	1703.17	0.000229947	0.0166517
INCENP	inner centromere protein	10.7276	1695.68	0.000475923	0.0245083
C8orf37	chromosome 8 open reading frame 37	10.7275	1695.53	3.56987e-06	0.00151437
NKAIN4	sodium/potassium transporting ATPase interacting 4	10.719	1685.58	0.000480809	0.0246232
CRB2	crumbs 2, cell polarity complex component	10.7124	1677.85	1.6103e-05	0.00356978
MS4A4A	membrane spanning 4-domains A4A	10.7079	1672.61	0.000482054	0.0246578
HYPK	huntingtin interacting protein K	10.7041	1668.25	0.000414875	0.0228246
PDE9A	phosphodiesterase 9A	10.6983	1661.53	0.00020462	0.0157556
POLL	DNA polymerase lambda	10.696	1658.87	1.10632e-05	0.00290739
PHOX2B	paired like homeobox 2b	10.693	1655.43	0.000491434	0.0249335
ZNF664	zinc finger protein 664	10.6819	1642.77	8.55881e-06	0.0025298
MYH2	myosin heavy chain 2	10.6801	1640.66	0.000416989	0.0229159
IQSEC1	IQ motif and Sec7 domain 1	10.679	1639.44	0.000494833	0.0249571
PFKM	phosphofructokinase, muscle	10.673	1632.65	0.00031402	0.0196523
TOGARAM1	TOG array regulator of axonemal microtubules 1	10.6534	1610.62	7.37019e-06	0.00230903
PLA2G4B	phospholipase A2 group IVB	10.651	1607.94	0.000499788	0.0250979
RUNDC3B	RUN domain containing 3B	10.6482	1604.83	1.02614e-05	0.00279165
WASHC2A	WASH complex subunit 2A	10.6384	1593.92	0.000313951	0.0196523
PHC2	polyhomeotic homolog 2	10.6355	1590.8	3.41114e-05	0.00545799
SV2B	synaptic vesicle glycoprotein 2B	10.6317	1586.58	3.20669e-06	0.00143106
SLC4A8	solute carrier family 4 member 8	10.6275	1581.99	0.000334771	0.0202424
ATXN1	ataxin 1	10.6211	1574.99	4.63558e-06	0.00176003
TFAP2D	transcription factor AP-2 delta	10.6203	1574.03	0.000317777	0.0197721
SLC43A1	solute carrier family 43 member 1	10.6181	1571.72	0.000450614	0.0238392
SPIRE1	spire type actin nucleation factor 1	10.6094	1562.24	1.11375e-05	0.00291578
N4BP1	NEDD4 binding protein 1	10.6021	1554.31	0.000285941	0.0188133
ADGRG7	adhesion G protein-coupled receptor G7	10.5982	1550.19	0.000199348	0.0155324
PLPPR1	phospholipid phosphatase related 1	10.5967	1548.6	0.000536597	0.0261676
NCEH1	neutral cholesterol ester hydrolase 1	10.5887	1539.95	0.00054636	0.026358
PTAFR	platelet activating factor receptor	10.5883	1539.53	0.000546065	0.026358
RPS6KL1	ribosomal protein S6 kinase like 1	10.5883	1539.53	0.000546337	0.026358
SLC12A5	solute carrier family 12 member 5	10.5844	1535.38	1.73634e-06	0.00103311
NDEL1	nudE neurodevelopment protein 1 like 1	10.5816	1532.44	0.000547592	0.0264055
MAP7D2	MAP7 domain containing 2	10.5808	1531.55	4.42465e-06	0.00172213
TBC1D24	TBC1 domain family member 24	10.5803	1531.03	9.1058e-06	0.00261281
SNX5	sorting nexin 5	10.5782	1528.85	0.000435832	0.0234819
STIM1	stromal interaction molecule 1	10.5659	1515.88	0.000555733	0.0266308
GABPB2	GA binding protein transcription factor subunit beta 2	10.5637	1513.51	0.000554446	0.0265987
SMG1	SMG1, nonsense mediated mRNA decay associated PI3K related kinase	10.5614	1511.11	0.000562772	0.0268203
MARCH3	membrane associated ring-CH-type finger 3	10.5597	1509.31	0.000443337	0.02369
PRIMA1	proline rich membrane anchor 1	10.5592	1508.78	0.000557565	0.0266553
DTX4	deltex E3 ubiquitin ligase 4	10.5584	1507.93	0.00054197	0.026266
NTF3	neurotrophin 3	10.5561	1505.6	2.43808e-05	0.00443477
ADGRL3	adhesion G protein-coupled receptor L3	10.5552	1504.59	2.4784e-05	0.00448563
ZNF347	zinc finger protein 347	10.5528	1502.17	0.000362048	0.0211301
SLC17A9	solute carrier family 17 member 9	10.5364	1485.15	0.000569913	0.0270432
DNAI2	dynein axonemal intermediate chain 2	10.5272	1475.67	0.000577168	0.0272193
SAT2	spermidine/spermine N1-acetyltransferase family member 2	10.5109	1459.18	0.000367617	0.0213373
OR13C4	olfactory receptor family 13 subfamily C member 4	10.5092	1457.43	0.000503886	0.0252207
FOXP1	forkhead box P1	10.5082	1456.4	0.000256429	0.0176753
BBS1	Bardet-Biedl syndrome 1	10.5038	1451.95	1.06191e-05	0.00282308
TSC22D3	TSC22 domain family member 3	10.4973	1445.48	1.32015e-05	0.00321145
C1QTNF2	C1q and TNF related 2	10.4813	1429.49	0.000310145	0.0195457
SRCIN1	SRC kinase signaling inhibitor 1	10.4638	1412.29	4.97983e-07	0.000495977
KLHL13	kelch like family member 13	10.4599	1408.48	1.03919e-05	0.00280043
VASP	vasodilator stimulated phosphoprotein	10.4536	1402.34	0.000625451	0.0284274
ACSF2	acyl-CoA synthetase family member 2	10.4483	1397.18	0.000628204	0.0284866
CST7	cystatin F	10.4459	1394.84	6.50826e-06	0.00216068
CDIP1	cell death inducing p53 target 1	10.4402	1389.34	0.000401775	0.0223696
LZTS2	leucine zipper tumor suppressor 2	10.439	1388.24	2.89161e-05	0.00493918
CCR6	C-C motif chemokine receptor 6	10.4378	1387.09	0.00063119	0.0285561
SH2D3C	SH2 domain containing 3C	10.4354	1384.78	0.000424699	0.0230903
MYO10	myosin X	10.4305	1380.02	2.42102e-05	0.00442908
NAPEPLD	N-acyl phosphatidylethanolamine phospholipase D	10.4226	1372.5	2.09507e-05	0.00413135
UPF1	UPF1, RNA helicase and ATPase	10.4225	1372.41	0.000476391	0.0245141
NSD2	nuclear receptor binding SET domain protein 2	10.4213	1371.28	6.32077e-06	0.00211891
SOGA3	SOGA family member 3	10.4209	1370.87	0.000375389	0.0215518
RELT	RELT, TNF receptor	10.4182	1368.34	0.000643454	0.0289215
TMPRSS6	transmembrane serine protease 6	10.4147	1365.02	0.000345002	0.0205966
NRDC	nardilysin convertase	10.4131	1363.54	2.85568e-05	0.00489396
HNRNPA1	heterogeneous nuclear ribonucleoprotein A1	10.4119	1362.33	0.000396717	0.0221832
ZNF620	zinc finger protein 620	10.4111	1361.65	0.00053099	0.0259813
TNFRSF17	TNF receptor superfamily member 17	10.4106	1361.16	0.000510386	0.0254435
XPNPEP3	X-prolyl aminopeptidase 3	10.3992	1350.41	0.000450592	0.0238392
COL9A1	collagen type IX alpha 1 chain	10.3928	1344.46	5.53773e-05	0.00729049
DGKA	diacylglycerol kinase alpha	10.3841	1336.35	7.13411e-06	0.00227978
SSC5D	scavenger receptor cysteine rich family member with 5 domains	10.3782	1330.9	0.000453135	0.0239253
RTN4RL2	reticulon 4 receptor like 2	10.3768	1329.6	0.000322767	0.0198935
CPA6	carboxypeptidase A6	10.3674	1321.01	0.000480841	0.0246232
STXBP1	syntaxin binding protein 1	10.366	1319.72	1.13583e-06	0.00078845
ZFPM1	zinc finger protein, FOG family member 1	10.353	1307.89	0.000328992	0.0200481
ZFAND3	zinc finger AN1-type containing 3	10.3529	1307.77	0.00069733	0.0302537
GJA8	gap junction protein alpha 8	10.3511	1306.12	6.37014e-06	0.00213026
HAO2	hydroxyacid oxidase 2	10.3509	1305.96	0.000457419	0.0239777
NTN4	netrin 4	10.3497	1304.86	0.000676713	0.0298058
IGLL5	immunoglobulin lambda like polypeptide 5	10.3484	1303.72	0.000596151	0.0277013
SLC2A1	solute carrier family 2 member 1	10.3463	1301.83	0.000676075	0.0297924
MLF1	myeloid leukemia factor 1	10.345	1300.63	0.000716905	0.0307528
PHACTR3	phosphatase and actin regulator 3	10.3429	1298.7	0.000615085	0.0282081
AFG1L	AFG1 like ATPase	10.3401	1296.23	0.000711327	0.0306435
FIBP	FGF1 intracellular binding protein	10.337	1293.44	2.97239e-05	0.00500658
MYRF	myelin regulatory factor	10.3184	1276.85	0.000513819	0.0255227
ANAPC15	anaphase promoting complex subunit 15	10.3175	1276.12	0.000583879	0.0274174
GPR6	G protein-coupled receptor 6	10.3115	1270.76	0.000569252	0.0270365
TCF7	transcription factor 7	10.3051	1265.14	0.000751067	0.0315013
TSPAN33	tetraspanin 33	10.3016	1262.09	0.000443485	0.02369
TOX3	TOX high mobility group box family member 3	10.299	1259.78	0.000602527	0.0278834
TBXA2R	thromboxane A2 receptor	10.291	1252.83	6.27027e-05	0.00784177
STX11	syntaxin 11	10.2881	1250.3	0.000716124	0.0307528
GALR1	galanin receptor 1	10.2837	1246.53	0.000480071	0.0246021
PARP11	poly(ADP-ribose) polymerase family member 11	10.283	1245.92	0.000326459	0.0199987
PSMB5	proteasome subunit beta 5	10.2705	1235.14	0.000729796	0.0310413
TNNT1	troponin T1, slow skeletal type	10.258	1224.5	0.000629933	0.0285363
PLN	phospholamban	10.2498	1217.54	0.00055075	0.0265046
EPB41L1	erythrocyte membrane protein band 4.1 like 1	10.2491	1216.98	0.000294743	0.0190818
FANCE	FA complementation group E	10.2472	1215.39	0.000635559	0.028697
BDKRB2	bradykinin receptor B2	10.2349	1205.05	0.000658431	0.0293238
KCNIP2	potassium voltage-gated channel interacting protein 2	10.2329	1203.38	1.2495e-05	0.00311116
FAIM2	Fas apoptotic inhibitory molecule 2	10.232	1202.61	2.618e-05	0.00465496
RAB5A	RAB5A, member RAS oncogene family	10.2284	1199.61	0.000613987	0.0281766
OR6F1	olfactory receptor family 6 subfamily F member 1	10.2268	1198.29	0.000505624	0.0252709
CDK18	cyclin dependent kinase 18	10.2252	1196.96	0.000510743	0.0254435
MCU	mitochondrial calcium uniporter	10.2224	1194.64	0.000312343	0.0196402
PIFO	primary cilia formation	10.2185	1191.46	0.000666335	0.0295431
DTNA	dystrobrevin alpha	10.2135	1187.32	0.000395194	0.0221431
SAMD9L	sterile alpha motif domain containing 9 like	10.213	1186.9	0.000502278	0.0251586
RPS6KA4	ribosomal protein S6 kinase A4	10.2103	1184.71	0.000827823	0.0333175
IQSEC3	IQ motif and Sec7 domain 3	10.2093	1183.85	0.000627411	0.0284788
CNBD2	cyclic nucleotide binding domain containing 2	10.2019	1177.81	4.18319e-05	0.00616905
TSR1	TSR1, ribosome maturation factor	10.2015	1177.51	2.5211e-05	0.00454738
SLC1A1	solute carrier family 1 member 1	10.1968	1173.63	4.78094e-05	0.00666442
DSEL	dermatan sulfate epimerase like	10.1901	1168.2	9.81119e-06	0.00275736
PCIF1	PDX1 C-terminal inhibiting factor 1	10.1861	1164.96	0.000619803	0.0283197
HEBP2	heme binding protein 2	10.1831	1162.6	2.11298e-05	0.00413699
ST3GAL2	ST3 beta-galactoside alpha-2,3-sialyltransferase 2	10.1816	1161.37	4.78909e-05	0.00666902
GRPEL2	GrpE like 2, mitochondrial	10.1735	1154.89	0.000851995	0.033892
TMEM79	transmembrane protein 79	10.1663	1149.12	0.000859657	0.0340995
PHACTR4	phosphatase and actin regulator 4	10.1652	1148.23	3.62624e-06	0.00153169
DSP	desmoplakin	10.1645	1147.69	0.000643815	0.0289273
PRCC	papillary renal cell carcinoma (translocation-associated)	10.1639	1147.23	0.000815394	0.0330268
NCKAP5	NCK associated protein 5	10.1612	1145.03	2.74199e-05	0.00475845
HDC	histidine decarboxylase	10.1595	1143.67	1.51281e-05	0.00344821
GNAZ	G protein subunit alpha z	10.1593	1143.52	0.000673855	0.0297422
UBAP2	ubiquitin associated protein 2	10.1586	1143.01	6.50515e-06	0.00216068
VWA1	von Willebrand factor A domain containing 1	10.1549	1140.07	0.000448853	0.0238194
HYLS1	HYLS1, centriolar and ciliogenesis associated	10.1518	1137.58	0.000875973	0.0344978
CERS1	ceramide synthase 1	10.1476	1134.27	0.000608787	0.0280315
TMEM121B	transmembrane protein 121B	10.1456	1132.71	0.000397251	0.022204
DHX40	DEAH-box helicase 40	10.1444	1131.81	0.000887098	0.0347072
MCRIP1	MAPK regulated corepressor interacting protein 1	10.1409	1129.04	0.000837958	0.0335877
TMEM51	transmembrane protein 51	10.1397	1128.11	0.000551934	0.0265327
ETFA	electron transfer flavoprotein subunit alpha	10.1371	1126.12	0.000730198	0.0310413
ELOVL2	ELOVL fatty acid elongase 2	10.137	1126.04	0.000893401	0.0347856
PUSL1	pseudouridylate synthase like 1	10.1318	1121.95	0.000705669	0.0305248
KCNJ9	potassium voltage-gated channel subfamily J member 9	10.1292	1119.95	0.000851364	0.033892
CAMK4	calcium/calmodulin dependent protein kinase IV	10.1276	1118.7	0.000359525	0.0210633
SLC25A28	solute carrier family 25 member 28	10.126	1117.43	0.000575517	0.0271977
NDRG2	NDRG family member 2	10.1243	1116.1	0.000899141	0.0349002
CDC23	cell division cycle 23	10.1235	1115.53	0.000376893	0.0216027
RAD23B	RAD23 homolog B, nucleotide excision repair protein	10.1231	1115.18	0.000695864	0.0302156
TTC17	tetratricopeptide repeat domain 17	10.1164	1110.01	1.02897e-05	0.00279165
PDE8B	phosphodiesterase 8B	10.1163	1109.96	0.000711443	0.0306435
PAX7	paired box 7	10.115	1109	0.000907895	0.0350519
TSPAN15	tetraspanin 15	10.1015	1098.64	0.000923891	0.0354131
GPR146	G protein-coupled receptor 146	10.1004	1097.83	0.000489327	0.0248541
AEBP1	AE binding protein 1	10.0924	1091.75	0.000543615	0.0262839
KCNK2	potassium two pore domain channel subfamily K member 2	10.0902	1090.08	0.00093679	0.0357321
GRHL1	grainyhead like transcription factor 1	10.0881	1088.51	0.000500199	0.0251084
APOBEC2	apolipoprotein B mRNA editing enzyme catalytic subunit 2	10.0858	1086.75	1.62475e-05	0.00357872
AMN	amnion associated transmembrane protein	10.0843	1085.63	5.16079e-05	0.0070369
UNC13A	unc-13 homolog A	10.0807	1082.91	5.45612e-05	0.00724551
MCM9	minichromosome maintenance 9 homologous recombination repair factor	10.0794	1081.91	4.30168e-06	0.00168771
MYH7B	myosin heavy chain 7B	10.079	1081.62	7.36428e-05	0.00869567
CDH24	cadherin 24	10.0705	1075.31	5.27208e-05	0.0071156
CXADR	CXADR, Ig-like cell adhesion molecule	10.0695	1074.54	0.000766597	0.0318706
FAF1	Fas associated factor 1	10.0694	1074.46	7.89678e-06	0.0024173
LIN28B	lin-28 homolog B	10.0649	1071.15	0.000964056	0.0362131
C1D	C1D nuclear receptor corepressor	10.0618	1068.78	0.000969025	0.0363005
PIP4P2	phosphatidylinositol-4,5-bisphosphate 4-phosphatase 2	10.0606	1067.95	4.25903e-06	0.00168212
RDH11	retinol dehydrogenase 11	10.0604	1067.77	0.000709806	0.0306294
SNAPIN	SNAP associated protein	10.0487	1059.18	0.000429307	0.0232848
ALX4	ALX homeobox 4	10.0482	1058.78	4.68425e-06	0.00177361
CDYL2	chromodomain Y like 2	10.0461	1057.28	0.000676814	0.0298058
MPZL2	myelin protein zero like 2	10.0456	1056.85	0.000585249	0.0274442
P2RX2	purinergic receptor P2X 2	10.042	1054.21	0.000738249	0.0312203
KAT14	lysine acetyltransferase 14	10.041	1053.55	0.000482685	0.0246616
FGF16	fibroblast growth factor 16	10.0362	1050.06	1.20438e-05	0.00306349
MAPKBP1	mitogen-activated protein kinase binding protein 1	10.0314	1046.52	0.000602069	0.0278716
CSNK1G2	casein kinase 1 gamma 2	10.0268	1043.2	0.000772864	0.0320104
ARL5A	ADP ribosylation factor like GTPase 5A	10.0259	1042.51	2.78814e-06	0.001326
KCNK12	potassium two pore domain channel subfamily K member 12	10.0251	1041.96	0.00065887	0.0293257
ZNF33B	zinc finger protein 33B	10.0225	1040.08	3.01011e-05	0.00503924
ZBTB26	zinc finger and BTB domain containing 26	10.0219	1039.66	2.01449e-05	0.00403615
TRIM63	tripartite motif containing 63	10.0203	1038.54	0.000478249	0.0245466
STX8	syntaxin 8	10.0183	1037.04	0.000769352	0.0319079
KCNMA1	potassium calcium-activated channel subfamily M alpha 1	10.0177	1036.65	0.000649309	0.0290791
P2RX1	purinergic receptor P2X 1	10.013	1033.24	0.000606414	0.0279597
PLXNA2	plexin A2	10.0107	1031.63	0.000881453	0.0345946
ARL8B	ADP ribosylation factor like GTPase 8B	10.0098	1030.96	4.02097e-05	0.00603339
VIPR2	vasoactive intestinal peptide receptor 2	10.0065	1028.64	0.000443795	0.0236973
PABPC1	poly(A) binding protein cytoplasmic 1	10.0015	1025.05	0.000760473	0.0317377
GRM1	glutamate metabotropic receptor 1	10.0005	1024.35	0.000469224	0.0242817
BICRAL	BRD4 interacting chromatin remodeling complex associated protein like	9.99687	1021.78	0.000777589	0.0321719
ZNF629	zinc finger protein 629	9.99394	1019.71	3.24718e-05	0.00528172
NRBF2	nuclear receptor binding factor 2	9.99109	1017.7	0.000574572	0.027194
JAG1	jagged 1	9.98999	1016.92	0.000607139	0.0279744
SCARB2	scavenger receptor class B member 2	9.9882	1015.66	2.66274e-05	0.00469202
PLPPR3	phospholipid phosphatase related 3	9.98697	1014.8	0.000819316	0.0330761
MYH1	myosin heavy chain 1	9.98625	1014.29	6.06441e-05	0.00769637
SNRPD3	small nuclear ribonucleoprotein D3 polypeptide	9.98333	1012.24	0.000642982	0.0289182
ENY2	ENY2, transcription and export complex 2 subunit	9.97961	1009.63	0.00104166	0.0380064
TAAR2	trace amine associated receptor 2 (gene/pseudogene)	9.97164	1004.07	1.51756e-05	0.00345331
SFT2D2	SFT2 domain containing 2	9.96532	999.677	7.9971e-06	0.00243083
IL15	interleukin 15	9.96033	996.225	0.00107313	0.0386215
ZFP36L1	ZFP36 ring finger protein like 1	9.95553	992.915	2.56067e-05	0.00459101
ZBTB25	zinc finger and BTB domain containing 25	9.95094	989.767	3.18064e-05	0.00521926
GGCT	gamma-glutamylcyclotransferase	9.94814	987.841	0.000721397	0.030865
THYN1	thymocyte nuclear protein 1	9.9454	985.971	1.30657e-05	0.0031887
DSG2	desmoglein 2	9.94452	985.368	2.20579e-06	0.00116158
SP4	Sp4 transcription factor	9.93716	980.358	0.0010894	0.0389536
AHCTF1	AT-hook containing transcription factor 1	9.93568	979.35	1.42206e-05	0.00334097
NEDD4	neural precursor cell expressed, developmentally down-regulated 4, E3 ubiquitin protein ligase	9.93351	977.88	9.91779e-06	0.00276092
ZNF233	zinc finger protein 233	9.92342	971.065	1.38788e-05	0.00329306
FCGR1A	Fc fragment of IgG receptor Ia	9.92096	969.407	0.00110159	0.0392041
CDKAL1	CDK5 regulatory subunit associated protein 1 like 1	9.9124	963.674	6.05943e-06	0.0020873
ZSWIM6	zinc finger SWIM-type containing 6	9.91041	962.343	0.00046583	0.024188
TSPAN5	tetraspanin 5	9.91034	962.299	0.00107345	0.038623
GIMAP8	GTPase, IMAP family member 8	9.90975	961.905	3.05996e-05	0.00507939
HGF	hepatocyte growth factor	9.90813	960.822	2.66045e-05	0.00469202
CAV3	caveolin 3	9.90122	956.235	0.00107741	0.0386944
SLC26A6	solute carrier family 26 member 6	9.90088	956.006	0.000782402	0.0322416
KCNMB3	potassium calcium-activated channel subfamily M regulatory beta subunit 3	9.89454	951.818	2.03238e-05	0.00405904
FGF10	fibroblast growth factor 10	9.89431	951.667	0.000705776	0.0305248
TPM1	tropomyosin 1	9.89164	949.902	0.000909384	0.0350528
SLC46A3	solute carrier family 46 member 3	9.88891	948.111	0.00111431	0.0394935
B4GALNT1	beta-1,4-N-acetyl-galactosaminyltransferase 1	9.88733	947.07	0.000630546	0.0285363
SPATA17	spermatogenesis associated 17	9.87617	939.772	0.000840631	0.0336838
SH2B2	SH2B adaptor protein 2	9.87077	936.263	0.000808044	0.0328679
ASTL	astacin like metalloendopeptidase	9.86937	935.354	0.000460315	0.024014
RREB1	ras responsive element binding protein 1	9.86857	934.834	0.00096754	0.0362647
ROCK2	Rho associated coiled-coil containing protein kinase 2	9.86329	931.421	0.000947954	0.0359422
GOSR1	golgi SNAP receptor complex member 1	9.8603	929.495	0.000813905	0.0330232
PPP1R12B	protein phosphatase 1 regulatory subunit 12B	9.85869	928.457	3.5525e-05	0.00561544
DVL3	dishevelled segment polarity protein 3	9.85415	925.541	0.00117991	0.0408637
FLRT2	fibronectin leucine rich transmembrane protein 2	9.85285	924.705	0.000694227	0.0302069
PARVB	parvin beta	9.85091	923.46	0.000724999	0.0309484
NCOA3	nuclear receptor coactivator 3	9.85018	922.993	4.02276e-06	0.00161668
PXN	paxillin	9.84929	922.426	0.000478189	0.0245466
SCG3	secretogranin III	9.8455	920.008	2.56199e-05	0.00459101
NDE1	nudE neurodevelopment protein 1	9.84526	919.85	0.0011388	0.0400093
RBM43	RNA binding motif protein 43	9.84133	917.349	0.00115854	0.0403738
JAKMIP1	janus kinase and microtubule interacting protein 1	9.83878	915.728	3.57216e-05	0.00563041
POLDIP3	DNA polymerase delta interacting protein 3	9.83541	913.591	0.000944603	0.0358911
SYNGR2	synaptogyrin 2	9.83064	910.58	0.000111711	0.0109593
PACS2	phosphofurin acidic cluster sorting protein 2	9.82925	909.699	3.8669e-06	0.00159227
CHIA	chitinase, acidic	9.82208	905.195	0.000101177	0.0103315
RLBP1	retinaldehyde binding protein 1	9.82022	904.027	0.000786388	0.0323412
NECAB1	N-terminal EF-hand calcium binding protein 1	9.81644	901.658	0.00118089	0.040873
LSM5	LSM5 homolog, U6 small nuclear RNA and mRNA degradation associated	9.81504	900.785	0.00119693	0.0411755
SLC35F4	solute carrier family 35 member F4	9.81124	898.419	0.00119203	0.0411342
TMEM266	transmembrane protein 266	9.81078	898.131	0.00120414	0.0412928
SPARC	secreted protein acidic and cysteine rich	9.8096	897.393	9.45535e-05	0.00998263
IL7	interleukin 7	9.80819	896.517	1.71779e-05	0.00367184
XPNPEP1	X-prolyl aminopeptidase 1	9.80571	894.978	0.000787778	0.0323596
LMTK3	lemur tyrosine kinase 3	9.80542	894.799	4.66775e-05	0.00657187
GPR26	G protein-coupled receptor 26	9.80376	893.771	7.91111e-05	0.00904079
SUPT3H	SPT3 homolog, SAGA and STAGA complex component	9.7998	891.32	0.00119881	0.0412101
VGF	VGF nerve growth factor inducible	9.79681	889.475	0.00121889	0.0414779
GGH	gamma-glutamyl hydrolase	9.79675	889.436	0.00054114	0.0262586
ZNF385B	zinc finger protein 385B	9.7929	887.069	0.000906891	0.0350347
AKAP1	A-kinase anchoring protein 1	9.78995	885.254	7.71264e-05	0.00893807
ADGRB1	adhesion G protein-coupled receptor B1	9.78977	885.147	0.00122577	0.04165
SPEN	spen family transcriptional repressor	9.7895	884.979	0.00066605	0.0295431
TMPRSS5	transmembrane serine protease 5	9.77836	878.17	0.000733002	0.0310947
ZNRF1	zinc and ring finger 1	9.77536	876.35	2.88954e-05	0.00493918
LRRK1	leucine rich repeat kinase 1	9.77338	875.149	0.000674701	0.0297694
PHYH	phytanoyl-CoA 2-hydroxylase	9.77274	874.755	0.00124418	0.0419952
MARCH2	membrane associated ring-CH-type finger 2	9.7721	874.368	0.00124062	0.041937
TRAM1	translocation associated membrane protein 1	9.76206	868.303	0.00124958	0.0421364
CNOT1	CCR4-NOT transcription complex subunit 1	9.75988	866.996	1.75575e-06	0.00103588
FAM169B	family with sequence similarity 169 member B	9.75194	862.239	0.00126499	0.042427
PPP2R2C	protein phosphatase 2 regulatory subunit Bgamma	9.74939	860.717	0.000984204	0.0367091
ZDHHC23	zinc finger DHHC-type containing 23	9.74772	859.718	2.01439e-05	0.00403615
ABRAXAS1	abraxas 1, BRCA1 A complex subunit	9.74615	858.783	6.30673e-06	0.00211891
BEST2	bestrophin 2	9.74583	858.593	0.000908804	0.0350528
TBL1X	transducin beta like 1 X-linked	9.74439	857.737	0.00127856	0.042684
ANO1	anoctamin 1	9.74254	856.638	0.00106439	0.0384817
ERCC8	ERCC excision repair 8, CSA ubiquitin ligase complex subunit	9.73556	852.503	0.00098285	0.0366916
CAPRIN1	cell cycle associated protein 1	9.73057	849.56	2.10876e-05	0.00413699
FGF14	fibroblast growth factor 14	9.72811	848.114	9.94335e-06	0.00276092
FXYD3	FXYD domain containing ion transport regulator 3	9.72635	847.077	0.00129023	0.0429276
RFX7	regulatory factor X7	9.72582	846.769	0.00112626	0.0397575
GPR173	G protein-coupled receptor 173	9.72535	846.49	0.001013	0.0373829
ZNF677	zinc finger protein 677	9.71791	842.136	1.82054e-05	0.0037979
QDPR	quinoid dihydropteridine reductase	9.71598	841.013	0.00129574	0.0430276
FABP6	fatty acid binding protein 6	9.71497	840.425	0.00131443	0.0433655
SLC2A11	solute carrier family 2 member 11	9.71338	839.496	0.000919629	0.0352967
TOMM40	translocase of outer mitochondrial membrane 40	9.71241	838.93	0.000570173	0.0270432
DAAM2	dishevelled associated activator of morphogenesis 2	9.70905	836.979	0.00090048	0.0349035
MUC21	mucin 21, cell surface associated	9.70297	833.459	1.95897e-05	0.00398887
PPHLN1	periphilin 1	9.70167	832.709	0.001121	0.0396425
NFE2	nuclear factor, erythroid 2	9.69502	828.883	0.00133939	0.0438416
ULK1	unc-51 like autophagy activating kinase 1	9.69129	826.737	0.00104197	0.0380076
RAPGEF5	Rap guanine nucleotide exchange factor 5	9.68158	821.192	0.000729102	0.0310413
C21orf58	chromosome 21 open reading frame 58	9.6791	819.786	0.00133053	0.0437167
TIMM50	translocase of inner mitochondrial membrane 50	9.67907	819.765	3.89578e-05	0.00594286
ZDHHC3	zinc finger DHHC-type containing 3	9.67857	819.481	0.0011148	0.0395007
B4GALT1	beta-1,4-galactosyltransferase 1	9.67856	819.479	0.000879195	0.0345473
TRIM13	tripartite motif containing 13	9.673	816.328	0.00114084	0.0400342
SDK2	sidekick cell adhesion molecule 2	9.67171	815.593	0.00136934	0.0444392
C19orf47	chromosome 19 open reading frame 47	9.66839	813.721	0.00136448	0.044331
LEMD3	LEM domain containing 3	9.66696	812.915	0.00120229	0.0412681
MIPOL1	mirror-image polydactyly 1	9.66384	811.158	0.00100672	0.0372657
IPCEF1	interaction protein for cytohesin exchange factors 1	9.65962	808.788	4.41743e-06	0.00172213
DYRK4	dual specificity tyrosine phosphorylation regulated kinase 4	9.65799	807.875	4.90407e-05	0.00678104
NILT4	NILT4leukocyte receptor	9.65242	804.764	0.00109481	0.0391049
KCNC4	potassium voltage-gated channel subfamily C member 4	9.65207	804.568	4.26216e-05	0.0062453
GAREM1	GRB2 associated regulator of MAPK1 subtype 1	9.65023	803.543	4.74539e-05	0.0066283
DNAJB9	DnaJ heat shock protein family (Hsp40) member B9	9.64823	802.431	8.9656e-05	0.00974238
CYYR1	cysteine and tyrosine rich 1	9.6413	798.585	0.00142067	0.0453353
SHC1	SHC adaptor protein 1	9.64125	798.559	0.00140459	0.0450042
CRYBG2	crystallin beta-gamma domain containing 2	9.64084	798.327	0.00101716	0.0374505
OARD1	O-acyl-ADP-ribose deacylase 1	9.63829	796.919	0.00117649	0.040802
ZNF250	zinc finger protein 250	9.63577	795.526	0.00140549	0.0450169
RTKN	rhotekin	9.63577	795.526	0.00140641	0.0450182
ANKRD37	ankyrin repeat domain 37	9.627	790.709	0.00109806	0.03917
IVD	isovaleryl-CoA dehydrogenase	9.62651	790.441	0.00113522	0.0399283
TLE3	transducin like enhancer of split 3	9.62604	790.179	0.00120938	0.0413592
CLDN6	claudin 6	9.62058	787.194	0.00145494	0.0458525
SH2D1B	SH2 domain containing 1B	9.6155	784.428	7.03984e-06	0.00226604
CENPL	centromere protein L	9.615	784.158	0.00145078	0.0457789
DCLK3	doublecortin like kinase 3	9.61242	782.755	1.3841e-05	0.00329129
UBE2G2	ubiquitin conjugating enzyme E2 G2	9.60458	778.512	0.00115269	0.0402838
SLC6A6	solute carrier family 6 member 6	9.59797	774.954	3.13402e-05	0.0051649
GTF2A2	general transcription factor IIA subunit 2	9.59675	774.298	0.00148457	0.0464162
PTGER2	prostaglandin E receptor 2	9.59672	774.283	4.30705e-06	0.00168771
KPNB1	karyopherin subunit beta 1	9.59531	773.526	7.5714e-05	0.00881154
SEMA3E	semaphorin 3E	9.59394	772.795	8.77611e-05	0.00964426
ASIC1	acid sensing ion channel subunit 1	9.59333	772.467	1.63984e-05	0.00359468
DENND4A	DENN domain containing 4A	9.59101	771.225	0.000138798	0.0125259
CAPG	capping actin protein, gelsolin like	9.58563	768.356	0.000870938	0.0343586
SRBD1	S1 RNA binding domain 1	9.58525	768.155	9.18173e-05	0.0098609
MFF	mitochondrial fission factor	9.58221	766.537	0.000852122	0.033892
DPP3	dipeptidyl peptidase 3	9.57688	763.709	1.16506e-05	0.00301271
CNTNAP5	contactin associated protein like 5	9.57668	763.603	8.45398e-05	0.00944917
MICAL2	microtubule associated monooxygenase, calponin and LIM domain containing 2	9.57381	762.087	2.1414e-05	0.00415711
STX5	syntaxin 5	9.57192	761.088	4.04079e-05	0.00603981
SORCS3	sortilin related VPS10 domain containing receptor 3	9.57094	760.574	1.58502e-05	0.00354943
MALT1	MALT1 paracaspase	9.56821	759.135	0.00153719	0.0471305
PCDH19	protocadherin 19	9.56723	758.618	0.000998515	0.0370257
ALG3	ALG3, alpha-1,3- mannosyltransferase	9.56554	757.731	2.42896e-05	0.00443355
SNRNP48	small nuclear ribonucleoprotein U11/U12 subunit 48	9.56534	757.623	0.00107451	0.0386305
INA	internexin neuronal intermediate filament protein alpha	9.561	755.351	0.00119693	0.0411755
SLC33A1	solute carrier family 33 member 1	9.5604	755.037	4.30595e-05	0.00628934
OSR1	odd-skipped related transciption factor 1	9.55664	753.07	0.00155042	0.0474178
DBH	dopamine beta-hydroxylase	9.55661	753.054	0.00121249	0.0413868
GHSR	growth hormone secretagogue receptor	9.55536	752.401	0.0011353	0.0399283
ULK3	unc-51 like kinase 3	9.5534	751.381	1.98793e-05	0.00402398
G3BP2	G3BP stress granule assembly factor 2	9.55121	750.241	1.66883e-05	0.00361784
FARS2	phenylalanyl-tRNA synthetase 2, mitochondrial	9.55106	750.165	0.00106377	0.0384817
RNF19B	ring finger protein 19B	9.55048	749.859	2.42329e-05	0.00442908
CENPX	centromere protein X	9.54984	749.53	0.00154432	0.0472839
APOO	apolipoprotein O	9.54873	748.95	9.67763e-05	0.0100895
BHLHE22	basic helix-loop-helix family member e22	9.54658	747.837	7.54786e-05	0.00879292
FOXD3	forkhead box D3	9.54219	745.564	0.000156024	0.0133961
MCM6	minichromosome maintenance complex component 6	9.5416	745.259	7.7005e-05	0.00893807
SSBP3	single stranded DNA binding protein 3	9.53321	740.939	0.00158316	0.0479707
HGD	homogentisate 1,2-dioxygenase	9.52025	734.314	8.08297e-05	0.00920616
RPAP2	RNA polymerase II associated protein 2	9.5187	733.524	9.44941e-05	0.00998263
F2	coagulation factor II, thrombin	9.51548	731.889	0.0012126	0.0413868
KLHDC8A	kelch domain containing 8A	9.50807	728.138	0.00120928	0.0413592
PPARG	peroxisome proliferator activated receptor gamma	9.50236	725.264	0.00125751	0.0422999
CTCF	CCCTC-binding factor	9.49226	720.205	0.00125132	0.0421742
GPRC6A	G protein-coupled receptor class C group 6 member A	9.48746	717.811	0.000837025	0.0335777
TMED10	transmembrane p24 trafficking protein 10	9.48539	716.78	0.00124297	0.0419853
SEC22C	SEC22 homolog C, vesicle trafficking protein	9.48466	716.419	0.00134457	0.0439798
MCCC2	methylcrotonoyl-CoA carboxylase 2	9.47748	712.861	0.00081706	0.033042
CCNQ	cyclin Q	9.47745	712.846	2.30691e-05	0.00433865
TMEM100	transmembrane protein 100	9.4762	712.231	0.00123241	0.0417828
SATB2	SATB homeobox 2	9.4757	711.985	0.00110032	0.0391838
HOMER3	homer scaffold protein 3	9.47412	711.206	2.54661e-05	0.00457537
CHD9	chromodomain helicase DNA binding protein 9	9.46557	707.002	0.00113955	0.0400163
SCAMP1	secretory carrier membrane protein 1	9.46292	705.706	5.44243e-05	0.00724133
EPS15L1	epidermal growth factor receptor pathway substrate 15 like 1	9.46055	704.546	4.34644e-05	0.00632703
SAP130	Sin3A associated protein 130	9.45813	703.365	0.00113422	0.0399283
CADM3	cell adhesion molecule 3	9.45798	703.294	0.00081982	0.0330761
TAC1	tachykinin precursor 1	9.45775	703.182	0.00128735	0.0428629
PRELID3B	PRELI domain containing 3B	9.45496	701.82	0.00133685	0.0438106
ZNF169	zinc finger protein 169	9.44315	696.101	0.000183715	0.014789
SHANK2	SH3 and multiple ankyrin repeat domains 2	9.44135	695.233	5.28064e-05	0.0071156
CRB3	crumbs 3, cell polarity complex component	9.43946	694.323	3.84239e-05	0.00588755
KCNJ15	potassium voltage-gated channel subfamily J member 15	9.43809	693.661	5.7746e-05	0.00748758
ODC1	ornithine decarboxylase 1	9.4362	692.753	0.000101737	0.0103605
HARS	histidyl-tRNA synthetase	9.43121	690.364	0.00154325	0.0472723
GPM6B	glycoprotein M6B	9.41386	682.108	6.40073e-05	0.00792243
BPNT1	3'(2'), 5'-bisphosphate nucleotidase 1	9.40681	678.784	2.31638e-05	0.00434936
LRRC8A	leucine rich repeat containing 8 VRAC subunit A	9.40386	677.396	2.3474e-05	0.00437378
VGLL4	vestigial like family member 4	9.40307	677.025	0.00123502	0.0418277
PIP5K1C	phosphatidylinositol-4-phosphate 5-kinase type 1 gamma	9.39824	674.765	4.7123e-05	0.00660895
FMO5	flavin containing monooxygenase 5	9.39764	674.484	0.0011614	0.0404529
HCK	HCK proto-oncogene, Src family tyrosine kinase	9.39757	674.45	6.70355e-05	0.00818425
RPLP1	ribosomal protein lateral stalk subunit P1	9.39456	673.046	0.000142628	0.0127295
TIMP2	TIMP metallopeptidase inhibitor 2	9.39081	671.299	0.000194405	0.0152938
RFX1	regulatory factor X1	9.39007	670.952	7.11002e-05	0.00852754
ART5	ADP-ribosyltransferase 5	9.38998	670.912	4.38542e-05	0.00633141
AQP10	aquaporin 10	9.38736	669.695	0.00148956	0.0464982
ZNF512	zinc finger protein 512	9.3857	668.924	0.00102016	0.0374849
FAM187A	family with sequence similarity 187 member A	9.38246	667.426	5.91802e-05	0.0075989
ITPR1	inositol 1,4,5-trisphosphate receptor type 1	9.38014	666.353	2.34045e-05	0.00437378
PIRT	phosphoinositide interacting regulator of transient receptor potential channels	9.37643	664.639	0.000149721	0.0130407
FNDC11	fibronectin type III domain containing 11	9.37112	662.196	0.000159877	0.0135643
TSPAN9	tetraspanin 9	9.37077	662.04	6.08303e-05	0.00771287
ELAVL2	ELAV like RNA binding protein 2	9.36782	660.686	0.00139744	0.0449182
HDAC6	histone deacetylase 6	9.36231	658.167	6.19701e-05	0.00779983
WSCD1	WSC domain containing 1	9.3521	653.527	0.000919893	0.035297
HPR	haptoglobin-related protein	9.34477	650.212	9.23784e-05	0.00987313
PUDP	pseudouridine 5'-phosphatase	9.34214	649.03	8.39271e-05	0.00940121
USP47	ubiquitin specific peptidase 47	9.3393	647.751	0.00142258	0.0453353
HGH1	HGH1 homolog	9.33737	646.886	5.11466e-05	0.00698786
CNTRL	centriolin	9.3358	646.183	0.0009574	0.036079
INF2	inverted formin, FH2 and WH2 domain containing	9.33245	644.686	0.000214096	0.0159975
SNAPC4	small nuclear RNA activating complex polypeptide 4	9.3297	643.457	4.37904e-05	0.00633141
ZBED4	zinc finger BED-type containing 4	9.32553	641.602	0.0015289	0.0470003
ACP5	acid phosphatase 5, tartrate resistant	9.31717	637.893	0.00169308	0.0497974
NAA30	N(alpha)-acetyltransferase 30, NatC catalytic subunit	9.30889	634.24	2.47659e-05	0.00448563
HERC1	HECT and RLD domain containing E3 ubiquitin protein ligase family member 1	9.29985	630.28	0.000156043	0.0133961
KCNIP1	potassium voltage-gated channel interacting protein 1	9.2987	629.777	0.00159788	0.0482457
RBCK1	RANBP2-type and C3HC4-type zinc finger containing 1	9.29484	628.098	8.50664e-05	0.00944993
KIF1BP	KIF1 binding protein	9.29092	626.39	8.15654e-05	0.00924973
CHRAC1	chromatin accessibility complex 1	9.2785	621.023	0.00157927	0.0478953
HPRT1	hypoxanthine phosphoribosyltransferase 1	9.27394	619.063	0.00148733	0.0464625
RIC3	RIC3 acetylcholine receptor chaperone	9.27276	618.555	0.00127972	0.0427126
ZIC3	Zic family member 3	9.26575	615.556	0.00160564	0.0483959
NTSR1	neurotensin receptor 1	9.26328	614.506	0.00016884	0.0140302
INHBA	inhibin subunit beta A	9.26292	614.351	0.0016011	0.0483226
FGFR1OP	FGFR1 oncogene partner	9.26038	613.271	0.0014218	0.0453353
SLC7A10	solute carrier family 7 member 10	9.25904	612.702	0.00015062	0.0131024
PRPF4B	pre-mRNA processing factor 4B	9.25858	612.504	0.00151253	0.0468218
NTNG1	netrin G1	9.25849	612.467	2.164e-05	0.00417737
NFS1	NFS1, cysteine desulfurase	9.257	611.837	0.00142701	0.0454328
RASIP1	Ras interacting protein 1	9.24833	608.169	0.00144453	0.0457624
CFAP54	cilia and flagella associated protein 54	9.24401	606.352	0.00162558	0.0487246
ZNF33A	zinc finger protein 33A	9.23935	604.394	8.90527e-05	0.00972181
LYVE1	lymphatic vessel endothelial hyaluronan receptor 1	9.23889	604.205	0.00146008	0.0459324
PAIP2B	poly(A) binding protein interacting protein 2B	9.22954	600.299	7.77816e-05	0.00898931
MTMR12	myotubularin related protein 12	9.22906	600.099	0.00154038	0.0472158
SH3KBP1	SH3 domain containing kinase binding protein 1	9.22402	598.009	8.38686e-05	0.00940121
PCDHGC4	protocadherin gamma subfamily C, 4	9.21849	595.718	0.00150188	0.0466522
GSG1L	GSG1 like	9.21672	594.988	2.15702e-05	0.00416976
WASF3	WAS protein family member 3	9.21328	593.572	0.00138854	0.0447682
ACOD1	aconitate decarboxylase 1	9.20536	590.321	0.00130205	0.0431643
MYADML2	myeloid associated differentiation marker like 2	9.20463	590.024	0.000106399	0.0106279
TBC1D19	TBC1 domain family member 19	9.20413	589.819	4.63502e-05	0.00656082
GCLC	glutamate-cysteine ligase catalytic subunit	9.20337	589.51	0.00170144	0.049904
SLC6A3	solute carrier family 6 member 3	9.19944	587.906	0.00150119	0.0466522
SMARCA4	SWI/SNF related, matrix associated, actin dependent regulator of chromatin, subfamily a, member 4	9.19865	587.582	8.60284e-05	0.00951254
SIX3	SIX homeobox 3	9.19426	585.797	0.000117562	0.0113391
ISCA1	iron-sulfur cluster assembly 1	9.19341	585.452	0.000153083	0.0132496
GNPTAB	N-acetylglucosamine-1-phosphate transferase subunits alpha and beta	9.19272	585.173	0.00156773	0.0476821
ACOT6	acyl-CoA thioesterase 6	9.18651	582.66	0.00025721	0.0177098
MIPEP	mitochondrial intermediate peptidase	9.18646	582.642	1.05497e-05	0.00281552
ACTB	actin beta	9.18068	580.311	0.0011231	0.0396618
GDF6	growth differentiation factor 6	9.17858	579.464	7.22168e-06	0.00228704
DDX11	DEAD/H-box helicase 11	9.1764	578.59	0.00165071	0.0489991
FTSJ3	FtsJ RNA methyltransferase homolog 3	9.17467	577.9	4.7019e-06	0.00177496
CCDC9	coiled-coil domain containing 9	9.17356	577.454	9.53538e-05	0.0100121
SMG6	SMG6, nonsense mediated mRNA decay factor	9.17247	577.015	0.0015562	0.0474889
MAPK3	mitogen-activated protein kinase 3	9.16089	572.405	0.00161862	0.0486484
ACBD5	acyl-CoA binding domain containing 5	9.15997	572.037	0.00119407	0.0411689
TAOK1	TAO kinase 1	9.14921	567.79	9.68248e-05	0.0100895
ZNF41	zinc finger protein 41	9.14901	567.708	5.02476e-05	0.00692007
FKBP15	FK506 binding protein 15	9.14722	567.005	6.52545e-05	0.00803312
GPC5	glypican 5	9.14418	565.813	0.000270133	0.0182567
PAQR7	progestin and adipoQ receptor family member 7	9.1389	563.743	0.00158637	0.0480258
SH3GLB2	SH3 domain containing GRB2 like, endophilin B2	9.1374	563.161	5.28653e-05	0.00711657
TRIM46	tripartite motif containing 46	9.13579	562.531	7.05308e-05	0.00847498
IL12A	interleukin 12A	9.13457	562.057	0.00164986	0.0489981
KHDC4	KH domain containing 4, pre-mRNA splicing factor	9.13415	561.891	0.000111483	0.0109447
DNAJC14	DnaJ heat shock protein family (Hsp40) member C14	9.13215	561.115	0.000206972	0.0158533
SCAMP5	secretory carrier membrane protein 5	9.12896	559.875	0.000271763	0.0183009
CD209	CD209 molecule	9.11636	555.005	0.000165243	0.013874
PADI3	peptidyl arginine deiminase 3	9.11533	554.61	0.00158459	0.047993
BORCS7	BLOC-1 related complex subunit 7	9.11469	554.363	0.00170029	0.0498813
NAA38	N(alpha)-acetyltransferase 38, NatC auxiliary subunit	9.11396	554.082	0.00168531	0.0496646
MBNL2	muscleblind like splicing regulator 2	9.10977	552.477	0.00168884	0.0497155
ANKUB1	ankyrin repeat and ubiquitin domain containing 1	9.10043	548.913	7.01152e-05	0.00844399
ABHD16A	abhydrolase domain containing 16A	9.10034	548.879	0.00140575	0.0450169
SLC18A1	solute carrier family 18 member A1	9.09167	545.588	0.000202047	0.0156729
ABCA2	ATP binding cassette subfamily A member 2	9.08523	543.16	1.2824e-05	0.00314748
NOV	nephroblastoma overexpressed	9.08159	541.791	0.000185755	0.0148955
PLD6	phospholipase D family member 6	9.06364	535.091	7.58476e-05	0.00881962
RAB7A	RAB7A, member RAS oncogene family	9.06135	534.242	2.29769e-05	0.00433796
SH3BGR	SH3 domain binding glutamate rich protein	9.06104	534.128	0.000194505	0.0152938
VPS13C	vacuolar protein sorting 13 homolog C	9.05823	533.089	7.49497e-05	0.00878958
ST6GAL2	ST6 beta-galactoside alpha-2,6-sialyltransferase 2	9.04962	529.915	0.000129732	0.0120074
KIF3C	kinesin family member 3C	9.0479	529.284	0.00161636	0.0486018
PIH1D2	PIH1 domain containing 2	9.04372	527.754	9.71872e-05	0.0100966
MYCN	MYCN proto-oncogene, bHLH transcription factor	9.03765	525.538	2.37649e-05	0.00439024
CYTL1	cytokine like 1	9.03742	525.453	3.14555e-05	0.00517381
SLC6A18	solute carrier family 6 member 18	9.03602	524.945	8.693e-06	0.00254213
SPOCK1	SPARC (osteonectin), cwcv and kazal like domains proteoglycan 1	9.03114	523.17	0.00148741	0.0464625
TMEM268	transmembrane protein 268	9.02388	520.546	4.67151e-05	0.00657187
IARS	isoleucyl-tRNA synthetase	9.02376	520.503	0.000189935	0.0150898
LHX5	LIM homeobox 5	9.02209	519.9	2.30536e-05	0.00433865
TFRC	transferrin receptor	9.01606	517.73	7.01281e-05	0.00844399
TNF	tumor necrosis factor	9.01057	515.767	0.00168479	0.04966
SPECC1	sperm antigen with calponin homology and coiled-coil domains 1	9.00662	514.355	1.73374e-05	0.00370018
CD207	CD207 molecule	8.99764	511.165	0.00158143	0.0479502
NOX5	NADPH oxidase 5	8.9845	506.53	1.63781e-05	0.00359468
USP13	ubiquitin specific peptidase 13	8.97943	504.75	0.00156336	0.0476112
DOC2B	double C2 domain beta	8.9762	503.623	1.53854e-05	0.00348948
CRBN	cereblon	8.96764	500.644	5.2289e-05	0.00708548
CNIH4	cornichon family AMPA receptor auxiliary protein 4	8.96679	500.35	6.24479e-05	0.00783843
MCHR2	melanin concentrating hormone receptor 2	8.96474	499.638	4.08222e-05	0.00606614
SPAST	spastin	8.95533	496.391	3.58077e-05	0.00563054
C1QL4	complement C1q like 4	8.94673	493.441	0.000129498	0.0120011
SNAP47	synaptosome associated protein 47	8.94334	492.281	0.000313952	0.0196523
DNM2	dynamin 2	8.93357	488.959	6.06293e-05	0.00769637
FADS2	fatty acid desaturase 2	8.93267	488.655	0.000140214	0.0126137
INPP5A	inositol polyphosphate-5-phosphatase A	8.93212	488.467	5.05153e-05	0.00694997
BMP8B	bone morphogenetic protein 8b	8.93078	488.013	1.65542e-05	0.00360583
GPR101	G protein-coupled receptor 101	8.92688	486.698	6.80634e-05	0.00826405
KMT5B	lysine methyltransferase 5B	8.92683	486.681	2.6978e-05	0.00472604
CTSO	cathepsin O	8.92511	486.102	0.000208466	0.0158739
AEN	apoptosis enhancing nuclease	8.92457	485.919	5.21939e-05	0.00708548
SLC12A1	solute carrier family 12 member 1	8.91682	483.316	0.00034412	0.0205909
DOK2	docking protein 2	8.90733	480.148	9.27559e-05	0.00988275
SIM1	SIM bHLH transcription factor 1	8.90547	479.528	0.00149482	0.0465775
MYH7	myosin heavy chain 7	8.89121	474.813	0.000238931	0.017033
IQCK	IQ motif containing K	8.88966	474.302	0.000171805	0.0141909
NSRP1	nuclear speckle splicing regulatory protein 1	8.87033	467.99	0.000141128	0.0126556
ZNF782	zinc finger protein 782	8.87021	467.95	0.00012066	0.0115087
ELMO1	engulfment and cell motility 1	8.86928	467.648	0.000238339	0.0170114
TSPAN11	tetraspanin 11	8.86074	464.888	0.000194083	0.0152869
PLTP	phospholipid transfer protein	8.85708	463.711	0.000339201	0.0203966
BICD1	BICD cargo adaptor 1	8.85635	463.475	1.46052e-05	0.00338516
GNB5	G protein subunit beta 5	8.85265	462.289	0.000186887	0.014934
SYT11	synaptotagmin 11	8.84857	460.985	0.000161755	0.0136805
NYX	nyctalopin	8.84457	459.707	0.000136759	0.0124071
CLDN10	claudin 10	8.84378	459.455	0.000331503	0.0201162
TRIM14	tripartite motif containing 14	8.83629	457.077	0.000109896	0.0108276
UBQLN4	ubiquilin 4	8.83517	456.72	6.55061e-05	0.00804606
PPP1R9B	protein phosphatase 1 regulatory subunit 9B	8.83516	456.72	7.71914e-05	0.00893807
ZNF263	zinc finger protein 263	8.83335	456.144	5.09793e-05	0.00697194
SLC9A6	solute carrier family 9 member A6	8.82575	453.749	0.000136744	0.0124071
RCOR3	REST corepressor 3	8.81261	449.635	9.20352e-05	0.0098609
SLC4A7	solute carrier family 4 member 7	8.80358	446.83	6.47165e-05	0.00799182
CLSTN2	calsyntenin 2	8.80109	446.058	0.00011642	0.0112764
DNAJB5	DnaJ heat shock protein family (Hsp40) member B5	8.79992	445.698	0.00014937	0.0130184
UBE2V1	ubiquitin conjugating enzyme E2 V1	8.7997	445.63	0.000217296	0.0161438
PCP4	Purkinje cell protein 4	8.79173	443.174	0.000196623	0.0153919
UCP2	uncoupling protein 2	8.7904	442.765	0.00170488	0.0499521
C1orf210	chromosome 1 open reading frame 210	8.79029	442.731	5.44071e-05	0.00724133
IRX2	iroquois homeobox 2	8.78852	442.189	4.05248e-05	0.00604766
USPL1	ubiquitin specific peptidase like 1	8.78443	440.936	7.11021e-05	0.00852754
CLEC4F	C-type lectin domain family 4 member F	8.78287	440.46	0.00040675	0.0225425
CYR61	cysteine rich angiogenic inducer 61	8.78182	440.14	0.000124049	0.011758
C19ORF70	chromosome 19 open reading frame 70	8.77964	439.476	0.00037116	0.0214253
TANC1	tetratricopeptide repeat, ankyrin repeat and coiled-coil containing 1	8.77713	438.712	0.000277542	0.0185087
KIRREL1	kirre like nephrin family adhesion molecule 1	8.77538	438.18	4.48172e-05	0.00642321
HAPLN4	hyaluronan and proteoglycan link protein 4	8.77106	436.871	5.80855e-05	0.00751036
KL	klotho	8.76955	436.413	2.4371e-05	0.00443477
FERD3L	Fer3 like bHLH transcription factor	8.76781	435.888	5.97634e-05	0.00763394
NLRC3	NLR family CARD domain containing 3	8.76487	435.001	1.97812e-05	0.00401596
TRIB1	tribbles pseudokinase 1	8.76324	434.51	0.00023204	0.0167681
TECR	trans-2,3-enoyl-CoA reductase	8.76303	434.446	0.000418491	0.0229532
FAM181B	family with sequence similarity 181 member B	8.76165	434.031	0.000203675	0.0157357
PRR9	proline rich 9	8.7597	433.443	0.000129207	0.0119996
MAP1B	microtubule associated protein 1B	8.75853	433.092	1.37805e-05	0.00328257
RSAD2	radical S-adenosyl methionine domain containing 2	8.74864	430.133	0.000137402	0.0124408
GPR137B	G protein-coupled receptor 137B	8.74642	429.471	7.27888e-05	0.00862739
GPATCH3	G-patch domain containing 3	8.74314	428.496	0.000293566	0.0190594
MFSD8	major facilitator superfamily domain containing 8	8.74243	428.287	0.000107675	0.0106777
LRRC58	leucine rich repeat containing 58	8.73882	427.214	0.000127373	0.0119093
PSPC1	paraspeckle component 1	8.73802	426.978	0.000180538	0.0146668
EHBP1L1	EH domain binding protein 1 like 1	8.73565	426.278	0.000144958	0.0128374
UTS2B	urotensin 2B	8.73039	424.727	7.7269e-05	0.00893953
RPRD1B	regulation of nuclear pre-mRNA domain containing 1B	8.72991	424.587	0.00011227	0.0110063
P2RY14	purinergic receptor P2Y14	8.72526	423.218	0.000917892	0.0352645
MAP3K8	mitogen-activated protein kinase kinase kinase 8	8.72324	422.626	0.000308615	0.0195022
SLC31A2	solute carrier family 31 member 2	8.71622	420.575	7.05406e-05	0.00847498
ASZ1	ankyrin repeat, SAM and basic leucine zipper domain containing 1	8.70759	418.066	0.000371511	0.0214276
CABLES1	Cdk5 and Abl enzyme substrate 1	8.70031	415.962	0.000126422	0.0118689
UBE2QL1	ubiquitin conjugating enzyme E2 Q family like 1	8.69936	415.69	0.00016843	0.0140131
FREM1	FRAS1 related extracellular matrix 1	8.69927	415.664	7.79823e-05	0.00899178
FAM198A	family with sequence similarity 198 member A	8.69731	415.098	0.00011596	0.0112477
ALOXE3	arachidonate lipoxygenase 3	8.69718	415.062	0.000243801	0.0172105
BMP6	bone morphogenetic protein 6	8.69449	414.287	9.25835e-05	0.00987696
IKZF4	IKAROS family zinc finger 4	8.68668	412.051	8.51661e-05	0.00944993
TAGLN3	transgelin 3	8.68613	411.895	0.000141434	0.0126558
PRODH2	proline dehydrogenase 2	8.68559	411.74	0.000312942	0.0196402
CEL	carboxyl ester lipase	8.685	411.572	6.66211e-05	0.00814651
IPMK	inositol polyphosphate multikinase	8.6822	410.774	0.00023582	0.0169359
P3H2	prolyl 3-hydroxylase 2	8.68029	410.229	6.40393e-05	0.00792243
SEC24C	SEC24 homolog C, COPII coat complex component	8.67696	409.283	0.00023511	0.0169274
HECW2	HECT, C2 and WW domain containing E3 ubiquitin protein ligase 2	8.67396	408.436	0.000214394	0.0159975
LRRC45	leucine rich repeat containing 45	8.67317	408.21	7.92453e-05	0.00904633
KCNN2	potassium calcium-activated channel subfamily N member 2	8.66844	406.874	0.000189704	0.0150851
PCM1	pericentriolar material 1	8.65829	404.022	0.000116409	0.0112764
ZNF649	zinc finger protein 649	8.65566	403.287	0.00030713	0.019462
ENTPD7	ectonucleoside triphosphate diphosphohydrolase 7	8.65216	402.308	2.75346e-05	0.00476633
PTGDR2	prostaglandin D2 receptor 2	8.64952	401.572	3.37038e-05	0.00541849
TAGLN	transgelin	8.64705	400.886	0.000440392	0.0235926
RBMX2	RNA binding motif protein X-linked 2	8.64481	400.265	7.85165e-05	0.0090231
PRKCSH	protein kinase C substrate 80K-H	8.64217	399.532	0.000275261	0.0184567
PPIL3	peptidylprolyl isomerase like 3	8.64022	398.993	0.000193561	0.0152544
BOP1	block of proliferation 1	8.63791	398.354	0.000249848	0.0174396
TNNT2	troponin T2, cardiac type	8.63779	398.322	5.27079e-05	0.0071156
COL14A1	collagen type XIV alpha 1 chain	8.63622	397.889	0.000518028	0.0256115
YKT6	YKT6 v-SNARE homolog	8.62636	395.179	0.000351585	0.020829
CCDC150	coiled-coil domain containing 150	8.62528	394.881	0.000223049	0.016394
AXIN1	axin 1	8.62437	394.635	0.000252379	0.0175281
MMP20	matrix metallopeptidase 20	8.62188	393.952	5.72801e-05	0.00746237
ADORA2A	adenosine A2a receptor	8.62047	393.569	0.000225297	0.0164449
AUTS2	AUTS2, activator of transcription and developmental regulator	8.61835	392.991	0.000198514	0.015485
C2CD4C	C2 calcium dependent domain containing 4C	8.61315	391.576	7.53897e-05	0.00879292
MSMO1	methylsterol monooxygenase 1	8.60907	390.472	4.46337e-05	0.00640358
DECR2	2,4-dienoyl-CoA reductase 2	8.60158	388.448	0.000336673	0.0203161
TRAPPC9	trafficking protein particle complex 9	8.5978	387.432	0.000289717	0.0189457
FNDC5	fibronectin type III domain containing 5	8.59129	385.689	4.60579e-05	0.00654015
KMT2B	lysine methyltransferase 2B	8.58402	383.75	0.000317009	0.0197422
TMEM198	transmembrane protein 198	8.57788	382.121	2.13653e-05	0.00415711
MGAT4C	MGAT4 family member C	8.57629	381.7	0.000118566	0.0114039
AZIN1	antizyme inhibitor 1	8.57065	380.21	0.000370187	0.0213961
ENOX2	ecto-NOX disulfide-thiol exchanger 2	8.56806	379.526	0.00010533	0.0105802
MPC2	mitochondrial pyruvate carrier 2	8.56543	378.837	0.000129577	0.0120011
PPP1R26	protein phosphatase 1 regulatory subunit 26	8.56237	378.032	0.000274883	0.0184478
KDM2A	lysine demethylase 2A	8.55717	376.672	0.000124658	0.011758
ATP9B	ATPase phospholipid transporting 9B (putative)	8.54679	373.972	3.59297e-05	0.00563054
FGF1	fibroblast growth factor 1	8.54558	373.661	0.000282434	0.0186525
DYNC1I1	dynein cytoplasmic 1 intermediate chain 1	8.53471	370.854	9.89805e-05	0.0102176
ZNF613	zinc finger protein 613	8.53243	370.268	7.79728e-05	0.00899178
PIP5KL1	phosphatidylinositol-4-phosphate 5-kinase like 1	8.53063	369.808	9.34332e-05	0.00991647
PCDHAC2	protocadherin alpha subfamily C, 2	8.52816	369.175	9.01078e-05	0.00976717
MDFI	MyoD family inhibitor	8.52338	367.954	0.000367229	0.021326
NCOA2	nuclear receptor coactivator 2	8.51999	367.09	0.000322357	0.0198771
GABBR2	gamma-aminobutyric acid type B receptor subunit 2	8.51892	366.817	0.000134176	0.0122862
ACACB	acetyl-CoA carboxylase beta	8.51815	366.622	0.000190325	0.0151116
VSTM4	V-set and transmembrane domain containing 4	8.51677	366.272	0.000321498	0.0198509
SPPL3	signal peptide peptidase like 3	8.51183	365.02	0.000207734	0.0158533
HIC2	HIC ZBTB transcriptional repressor 2	8.51011	364.585	0.000245182	0.0172814
SH3BGRL	SH3 domain binding glutamate rich protein like	8.50991	364.533	0.000154261	0.0133096
ZNF248	zinc finger protein 248	8.50505	363.308	3.07159e-05	0.0050864
ICK	intestinal cell kinase	8.50137	362.383	0.000100953	0.0103169
ATP1B2	ATPase Na+/K+ transporting subunit beta 2	8.49791	361.514	0.000238867	0.017033
HNRNPC	heterogeneous nuclear ribonucleoprotein C (C1/C2)	8.49703	361.294	0.000268551	0.0182006
BICC1	BicC family RNA binding protein 1	8.49378	360.481	0.000320814	0.0198353
KIAA1211L	KIAA1211 like	8.4883	359.114	3.08384e-05	0.00510054
RAPGEF3	Rap guanine nucleotide exchange factor 3	8.48489	358.267	0.000129911	0.0120151
CDC14B	cell division cycle 14B	8.48477	358.237	3.87914e-05	0.00593064
VPS37B	VPS37B, ESCRT-I subunit	8.48156	357.44	0.000220022	0.0162365
NT5C1A	5'-nucleotidase, cytosolic IA	8.4804	357.155	9.51561e-05	0.0100121
KLHL12	kelch like family member 12	8.4681	354.121	0.000203905	0.0157359
SRGAP2	SLIT-ROBO Rho GTPase activating protein 2	8.46576	353.548	0.000644348	0.0289323
TGFB3	transforming growth factor beta 3	8.46527	353.427	0.000182642	0.0147318
SLC1A5	solute carrier family 1 member 5	8.46303	352.878	0.000106949	0.0106328
SLC16A3	solute carrier family 16 member 3	8.45238	350.283	0.000169652	0.0140807
COPS4	COP9 signalosome subunit 4	8.45171	350.121	0.00010677	0.0106328
GTF2H4	general transcription factor IIH subunit 4	8.44631	348.813	0.000386924	0.0218669
B3GALT6	beta-1,3-galactosyltransferase 6	8.44422	348.307	0.000186104	0.0149108
SYN2	synapsin II	8.4324	345.466	0.000482847	0.0246616
SEPHS2	selenophosphate synthetase 2	8.4305	345.011	5.22409e-05	0.00708548
ABI2	abl interactor 2	8.42856	344.548	7.1235e-05	0.00853603
TPH2	tryptophan hydroxylase 2	8.42524	343.755	0.000263221	0.018017
TAPBPL	TAP binding protein like	8.42071	342.678	0.000193382	0.0152544
RAB5C	RAB5C, member RAS oncogene family	8.42037	342.597	0.000101895	0.0103663
CAPN7	calpain 7	8.41907	342.289	9.14123e-05	0.00984384
ZNF16	zinc finger protein 16	8.41817	342.075	0.000383497	0.0217807
ZNF335	zinc finger protein 335	8.41674	341.737	0.000126283	0.0118639
KALRN	kalirin RhoGEF kinase	8.41535	341.408	0.000131473	0.0120952
CORO7-PAM16	CORO7-PAM16 readthrough	8.41394	341.073	0.000677418	0.0298229
PRKG1	protein kinase cGMP-dependent 1	8.41385	341.052	0.000180031	0.0146536
BOK	BOK, BCL2 family apoptosis regulator	8.41126	340.441	0.000116869	0.0112896
SLC41A1	solute carrier family 41 member 1	8.4108	340.331	0.000143976	0.0128
TIAM2	T cell lymphoma invasion and metastasis 2	8.40213	338.294	0.000540047	0.0262334
IQGAP3	IQ motif containing GTPase activating protein 3	8.39259	336.064	0.000264463	0.0180661
ARHGAP21	Rho GTPase activating protein 21	8.3884	335.089	0.000346722	0.0206454
SCX	scleraxis bHLH transcription factor	8.38668	334.689	8.66165e-05	0.00956218
HIF1AN	hypoxia inducible factor 1 subunit alpha inhibitor	8.38494	334.285	7.40855e-05	0.00873293
RERGL	RERG like	8.37914	332.944	0.000370666	0.0214148
FBF1	Fas binding factor 1	8.37067	330.995	6.21174e-05	0.00780997
MCF2L	MCF.2 cell line derived transforming sequence like	8.36826	330.443	8.82025e-05	0.00965968
MOCS3	molybdenum cofactor synthesis 3	8.36435	329.55	5.45299e-05	0.00724551
ASB7	ankyrin repeat and SOCS box containing 7	8.3639	329.446	4.35384e-05	0.00632703
TRAPPC1	trafficking protein particle complex 1	8.36029	328.624	0.000112642	0.011027
GOLGA5	golgin A5	8.35724	327.93	0.000720585	0.030844
ACTA1	actin, alpha 1, skeletal muscle	8.35622	327.696	9.37238e-05	0.00993198
TCERG1	transcription elongation regulator 1	8.35244	326.839	0.0003295	0.0200655
MECR	mitochondrial trans-2-enoyl-CoA reductase	8.35062	326.427	0.000477715	0.0245454
PTX4	pentraxin 4	8.34843	325.932	0.000205873	0.0158166
PRKAA1	protein kinase AMP-activated catalytic subunit alpha 1	8.34425	324.989	0.000482794	0.0246616
ARHGEF7	Rho guanine nucleotide exchange factor 7	8.34284	324.672	0.000745277	0.0314021
NIN	ninein	8.34279	324.66	6.12782e-05	0.00774822
ALX1	ALX homeobox 1	8.33945	323.909	5.55629e-05	0.00730094
ASH1L	ASH1 like histone lysine methyltransferase	8.33905	323.82	6.03756e-05	0.0076907
MB21D2	Mab-21 domain containing 2	8.3386	323.719	5.67212e-05	0.0074036
TRIM25	tripartite motif containing 25	8.33767	323.511	0.000247135	0.0173214
TRIM44	tripartite motif containing 44	8.33413	322.718	0.000156863	0.0134182
EFCC1	EF-hand and coiled-coil domain containing 1	8.3299	321.773	0.00059334	0.0276449
DAB1	DAB1, reelin adaptor protein	8.32937	321.655	0.000131396	0.0120952
FAM161A	FAM161A, centrosomal protein	8.323	320.238	0.000302717	0.0193429
FOXO4	forkhead box O4	8.32248	320.122	6.36172e-05	0.00791295
PDCD11	programmed cell death 11	8.31916	319.388	0.00108771	0.0389321
A1CF	APOBEC1 complementation factor	8.31733	318.981	0.000487995	0.0247956
CNNM2	cyclin and CBS domain divalent metal cation transport mediator 2	8.31492	318.448	0.000196451	0.0153919
FRMD4B	FERM domain containing 4B	8.31458	318.375	0.000477048	0.0245295
PEAK1	pseudopodium enriched atypical kinase 1	8.30709	316.726	0.000252973	0.0175516
UBE3A	ubiquitin protein ligase E3A	8.30039	315.258	0.000495656	0.0249633
KATNAL2	katanin catalytic subunit A1 like 2	8.29946	315.055	0.000617767	0.0282665
ZNF628	zinc finger protein 628	8.29918	314.995	0.000153276	0.0132496
CGA	glycoprotein hormones, alpha polypeptide	8.29895	314.943	0.000717798	0.030763
DAB2IP	DAB2 interacting protein	8.29889	314.931	0.000272917	0.0183606
GPR34	G protein-coupled receptor 34	8.29364	313.787	0.000328884	0.0200481
VEGFC	vascular endothelial growth factor C	8.29122	313.261	0.000458467	0.0240022
GJB1	gap junction protein beta 1	8.28545	312.01	0.000626675	0.0284569
TMEM154	transmembrane protein 154	8.28421	311.742	0.000137332	0.0124408
MTSS1L	MTSS1L, I-BAR domain containing	8.27771	310.342	0.000580301	0.027324
SP3	Sp3 transcription factor	8.27296	309.32	0.000155615	0.0133845
CBLN1	cerebellin 1 precursor	8.27116	308.935	0.000237843	0.0169995
SNX3	sorting nexin 3	8.26797	308.252	0.000731982	0.0310802
SLC16A6	solute carrier family 16 member 6	8.26641	307.92	0.000282548	0.0186525
GABRA4	gamma-aminobutyric acid type A receptor alpha4 subunit	8.26532	307.687	0.000209629	0.0158945
RBM17	RNA binding motif protein 17	8.26237	307.059	7.549e-05	0.00879292
EIF2A	eukaryotic translation initiation factor 2A	8.26188	306.955	0.00019756	0.0154281
EVX1	even-skipped homeobox 1	8.26115	306.799	0.000601007	0.0278506
VARS2	valyl-tRNA synthetase 2, mitochondrial	8.25665	305.844	0.000276441	0.0184981
SENP3	SUMO specific peptidase 3	8.25508	305.511	0.000615592	0.028222
KLHL26	kelch like family member 26	8.25141	304.736	0.000341105	0.0204728
ALPL	alkaline phosphatase, liver/bone/kidney	8.24859	304.14	0.000291737	0.0189896
SLC5A7	solute carrier family 5 member 7	8.24785	303.983	0.000380294	0.0217065
SRXN1	sulfiredoxin 1	8.23845	302.01	0.000175462	0.0143892
GRIA4	glutamate ionotropic receptor AMPA type subunit 4	8.23358	300.991	9.8764e-05	0.0102176
STXBP4	syntaxin binding protein 4	8.22882	299.999	0.000439599	0.0235926
BAIAP2L2	BAI1 associated protein 2 like 2	8.22879	299.994	5.07322e-05	0.00696899
MBD3	methyl-CpG binding domain protein 3	8.22805	299.839	3.90426e-05	0.00594919
EFCAB14	EF-hand calcium binding domain 14	8.22707	299.636	0.000148869	0.0129921
WNK2	WNK lysine deficient protein kinase 2	8.22448	299.099	0.000165382	0.0138772
BANK1	B cell scaffold protein with ankyrin repeats 1	8.21374	296.881	0.000833315	0.0335009
SKOR2	SKI family transcriptional corepressor 2	8.20947	296.004	0.000411295	0.0226937
ZNF646	zinc finger protein 646	8.2079	295.682	0.000431398	0.0233437
ZNF226	zinc finger protein 226	8.20567	295.226	0.000190429	0.0151116
SNED1	sushi, nidogen and EGF like domains 1	8.20307	294.693	0.000158585	0.0135027
MUC5AC	mucin 5AC, oligomeric mucus/gel-forming	8.20303	294.686	4.23776e-05	0.00622616
ABLIM1	actin binding LIM protein 1	8.20029	294.125	0.000324106	0.0199492
NCAM1	neural cell adhesion molecule 1	8.19978	294.022	0.00032548	0.0199889
TMEM167A	transmembrane protein 167A	8.19916	293.896	0.000393109	0.0220803
ENO2	enolase 2	8.19372	292.79	0.000170876	0.0141311
GMEB1	glucocorticoid modulatory element binding protein 1	8.19314	292.672	0.000180555	0.0146668
DCAF6	DDB1 and CUL4 associated factor 6	8.18941	291.917	6.98932e-05	0.00844399
GPR132	G protein-coupled receptor 132	8.18894	291.822	0.000349104	0.0207356
CD300E	CD300e molecule	8.1887	291.773	0.000212904	0.0159975
AFAP1	actin filament associated protein 1	8.18724	291.478	0.000725051	0.0309484
CKLF	chemokine like factor	8.18239	290.498	0.000378223	0.0216264
GNG5	G protein subunit gamma 5	8.18107	290.233	0.00114886	0.0401894
NUP58	nucleoporin 58	8.17994	290.006	0.00013224	0.0121333
ZBTB33	zinc finger and BTB domain containing 33	8.17547	289.108	0.000409187	0.0226113
GIMAP4	GTPase, IMAP family member 4	8.17483	288.981	6.76168e-05	0.00823165
S100A1	S100 calcium binding protein A1	8.17358	288.731	0.000806645	0.0328402
ICOSLG	inducible T cell costimulator ligand	8.17355	288.724	0.000687909	0.0300482
MIF	macrophage migration inhibitory factor	8.17	288.016	0.000665162	0.0295197
YIF1B	Yip1 interacting factor homolog B, membrane trafficking protein	8.16485	286.988	0.000267009	0.0181318
ADD3	adducin 3	8.16324	286.669	0.000291253	0.0189842
HBP1	HMG-box transcription factor 1	8.15779	285.587	0.00025098	0.0174777
SETBP1	SET binding protein 1	8.15738	285.507	0.000225742	0.0164599
HINFP	histone H4 transcription factor	8.15431	284.9	0.00017903	0.0146033
NOP53	NOP53 ribosome biogenesis factor	8.15312	284.666	0.000621666	0.0283774
NFATC4	nuclear factor of activated T cells 4	8.15211	284.465	0.000143159	0.0127532
PIK3AP1	phosphoinositide-3-kinase adaptor protein 1	8.14588	283.24	0.00013007	0.0120151
PTH2R	parathyroid hormone 2 receptor	8.14476	283.021	0.000511793	0.0254773
GBA3	glucosylceramidase beta 3 (gene/pseudogene)	8.13538	281.185	0.000156384	0.0134086
DNMT3A	DNA methyltransferase 3 alpha	8.1344	280.994	0.000529266	0.0259338
E2F1	E2F transcription factor 1	8.13347	280.814	9.31701e-05	0.00990385
SSRP1	structure specific recognition protein 1	8.13344	280.807	0.00032167	0.0198526
ITPKB	inositol-trisphosphate 3-kinase B	8.13247	280.62	0.000203842	0.0157359
HRG	histidine rich glycoprotein	8.12816	279.783	0.00084934	0.0338495
CLN8	CLN8, transmembrane ER and ERGIC protein	8.12687	279.532	0.000268018	0.0181734
GNS	glucosamine (N-acetyl)-6-sulfatase	8.12653	279.466	7.91309e-05	0.00904079
AGAP1	ArfGAP with GTPase domain, ankyrin repeat and PH domain 1	8.1261	279.382	0.000182031	0.014708
S1PR1	sphingosine-1-phosphate receptor 1	8.12492	279.155	0.000118147	0.0113795
TGM5	transglutaminase 5	8.12128	278.45	0.000555355	0.0266308
SHANK1	SH3 and multiple ankyrin repeat domains 1	8.11691	277.608	9.22136e-05	0.0098632
DFFA	DNA fragmentation factor subunit alpha	8.11584	277.404	0.000364216	0.0212026
MYH4	myosin heavy chain 4	8.1132	276.896	0.000375233	0.0215518
ZBTB37	zinc finger and BTB domain containing 37	8.11291	276.84	0.000726304	0.0309827
DENND1A	DENN domain containing 1A	8.11204	276.674	0.000173684	0.014303
SLC45A1	solute carrier family 45 member 1	8.11199	276.665	0.00031962	0.0198349
NAB2	NGFI-A binding protein 2	8.1115	276.57	0.000651663	0.029156
NXPH4	neurexophilin 4	8.11001	276.283	0.000228478	0.0166053
DENND2A	DENN domain containing 2A	8.1095	276.187	0.000167292	0.0139477
SPHK2	sphingosine kinase 2	8.09767	273.931	0.000466909	0.0242254
BTBD3	BTB domain containing 3	8.09277	273.003	0.000123271	0.0117041
ATXN2	ataxin 2	8.0887	272.233	0.000130518	0.0120247
LMOD3	leiomodin 3	8.08742	271.992	0.000124351	0.011758
CNPY2	canopy FGF signaling regulator 2	8.08523	271.579	0.000947823	0.0359422
IL17RD	interleukin 17 receptor D	8.08428	271.401	6.99701e-05	0.00844399
ZNF70	zinc finger protein 70	8.08157	270.891	0.000277266	0.0185087
CPAMD8	C3 and PZP like, alpha-2-macroglobulin domain containing 8	8.07673	269.985	0.000464942	0.024151
GMNN	geminin, DNA replication inhibitor	8.07368	269.413	0.000308006	0.019478
CMIP	c-Maf inducing protein	8.07202	269.104	0.000345353	0.0205966
MTMR2	myotubularin related protein 2	8.06874	268.494	0.000435228	0.023477
DPH5	diphthamide biosynthesis 5	8.06831	268.414	0.000476985	0.0245295
ZC3H13	zinc finger CCCH-type containing 13	8.06807	268.368	0.000220781	0.0162708
TTF1	transcription termination factor 1	8.06645	268.068	0.000584479	0.0274268
COL7A1	collagen type VII alpha 1 chain	8.0618	267.204	0.000217569	0.0161523
RNF41	ring finger protein 41	8.06066	266.992	0.000675384	0.0297715
SH3BP2	SH3 domain binding protein 2	8.05802	266.505	0.000254611	0.0176208
TRAFD1	TRAF-type zinc finger domain containing 1	8.05045	265.111	0.000195417	0.015348
GABRP	gamma-aminobutyric acid type A receptor pi subunit	8.04917	264.875	0.000199094	0.0155215
IGHM	immunoglobulin heavy constant mu	8.04578	264.254	0.000183225	0.0147691
MZT2B	mitotic spindle organizing protein 2B	8.04145	263.462	0.000783148	0.032256
CNTN5	contactin 5	8.03928	263.066	0.000582719	0.0273816
DOCK9	dedicator of cytokinesis 9	8.03761	262.762	0.00104854	0.0381299
AGBL4	ATP/GTP binding protein like 4	8.03616	262.498	6.12078e-05	0.00774644
UBXN7	UBX domain protein 7	8.03562	262.399	0.000401428	0.0223648
NUTF2	nuclear transport factor 2	8.03536	262.352	0.000167443	0.0139477
TBC1D10B	TBC1 domain family member 10B	8.03397	262.1	0.000142317	0.0127099
PWWP2A	PWWP domain containing 2A	8.03395	262.096	0.000278363	0.0185365
PRPH2	peripherin 2	8.03355	262.023	5.58642e-05	0.00732652
ZNF205	zinc finger protein 205	8.03272	261.872	0.000666793	0.0295539
SYTL2	synaptotagmin like 2	8.03199	261.74	0.000638321	0.0287745
NPFFR1	neuropeptide FF receptor 1	8.02096	259.746	0.000304491	0.0193916
PCDHGA2	protocadherin gamma subfamily A, 2	8.01871	259.342	0.000211982	0.0159594
LACTBL1	lactamase beta like 1	8.01864	259.328	0.000456885	0.0239772
ZFP41	ZFP41 zinc finger protein	8.0182	259.251	0.000325747	0.0199964
LONRF3	LON peptidase N-terminal domain and ring finger 3	8.01667	258.976	0.000177718	0.0145222
FARP1	FERM, ARH/RhoGEF and pleckstrin domain protein 1	8.01444	258.576	0.000356988	0.0209594
STAP2	signal transducing adaptor family member 2	8.01418	258.529	0.000327882	0.0200291
CLIP1	CAP-Gly domain containing linker protein 1	8.01289	258.297	0.000336517	0.0203161
ZNF25	zinc finger protein 25	8.01239	258.209	0.000150353	0.0130875
MID1	midline 1	8.01224	258.182	0.000785687	0.0323412
MAP3K19	mitogen-activated protein kinase kinase kinase 19	8.01222	258.178	0.000355874	0.0209064
ISM1	isthmin 1	8.00852	257.516	0.000186633	0.0149224
MLX	MLX, MAX dimerization protein	8.00566	257.007	0.000512911	0.0255017
CD276	CD276 molecule	8.00542	256.964	0.000584986	0.0274412
NAA16	N(alpha)-acetyltransferase 16, NatA auxiliary subunit	8.0031	256.55	0.00046239	0.024073
SGK1	serum/glucocorticoid regulated kinase 1	8.003	256.532	0.000798993	0.0326836
ARHGAP22	Rho GTPase activating protein 22	8.0028	256.497	0.000354513	0.0209043
PAQR3	progestin and adipoQ receptor family member 3	8.00108	256.191	0.000409022	0.0226113
UROC1	urocanate hydratase 1	8.0001	256.018	0.0005174	0.025608
RGS5	regulator of G protein signaling 5	7.99535	255.176	0.000127245	0.0119054
PLEKHA1	pleckstrin homology domain containing A1	7.99211	254.603	0.000593351	0.0276449
AIFM3	apoptosis inducing factor, mitochondria associated 3	7.99074	254.362	0.000659151	0.0293287
TDG	thymine DNA glycosylase	7.98855	253.975	0.000845014	0.0337443
FGL1	fibrinogen like 1	7.98256	252.924	0.000694492	0.0302069
VDR	vitamin D receptor	7.97786	252.101	0.000136219	0.0123826
SRPK2	SRSF protein kinase 2	7.97118	250.936	0.000389103	0.0219569
PDZRN4	PDZ domain containing ring finger 4	7.96824	250.425	0.00109687	0.0391479
PLXNA4	plexin A4	7.96807	250.397	0.000494561	0.0249571
CFAP46	cilia and flagella associated protein 46	7.96259	249.448	0.000431854	0.0233537
UBLCP1	ubiquitin like domain containing CTD phosphatase 1	7.9624	249.415	0.000577284	0.0272193
LIPH	lipase H	7.9623	249.396	0.000448267	0.0238187
CD248	CD248 molecule	7.95846	248.735	0.000456689	0.0239772
DDTL	D-dopachrome tautomerase like	7.9582	248.689	0.000462924	0.0240904
CAMK2B	calcium/calmodulin dependent protein kinase II beta	7.95361	247.9	0.000299978	0.0192626
TXNDC17	thioredoxin domain containing 17	7.95122	247.49	0.00109597	0.0391258
TRIM16	tripartite motif containing 16	7.94814	246.961	0.000223513	0.0164011
STRC	stereocilin	7.94477	246.384	0.000493803	0.0249571
ABR	ABR, RhoGEF and GTPase activating protein	7.93829	245.28	0.000456591	0.0239772
FKBP10	FK506 binding protein 10	7.93669	245.008	0.000481377	0.0246323
GLIS1	GLIS family zinc finger 1	7.93574	244.848	0.000588453	0.0274987
DCAF5	DDB1 and CUL4 associated factor 5	7.93521	244.757	0.000266836	0.0181308
RGCC	regulator of cell cycle	7.93427	244.599	0.0011481	0.0401806
PARP9	poly(ADP-ribose) polymerase family member 9	7.93182	244.184	0.00089857	0.0348879
PARP12	poly(ADP-ribose) polymerase family member 12	7.93098	244.042	0.000306353	0.0194307
MFAP3L	microfibril associated protein 3 like	7.92828	243.584	0.0010549	0.0382759
SLC27A4	solute carrier family 27 member 4	7.927	243.368	0.000155359	0.0133791
HNRNPLL	heterogeneous nuclear ribonucleoprotein L like	7.92612	243.22	0.000380133	0.0217063
TNFSF13B	TNF superfamily member 13b	7.92412	242.883	0.000366575	0.0213218
FTO	FTO, alpha-ketoglutarate dependent dioxygenase	7.91915	242.048	0.000306322	0.0194307
KCNV2	potassium voltage-gated channel modifier subfamily V member 2	7.91546	241.43	0.000460839	0.0240214
GUK1	guanylate kinase 1	7.91327	241.063	0.000455662	0.0239772
LTN1	listerin E3 ubiquitin protein ligase 1	7.90805	240.193	0.000269881	0.0182567
CPB2	carboxypeptidase B2	7.9031	239.371	0.000279007	0.0185434
TRAPPC3	trafficking protein particle complex 3	7.8977	238.476	0.000212027	0.0159594
CTNNA2	catenin alpha 2	7.89436	237.924	0.000219747	0.0162352
CCP110	centriolar coiled-coil protein 110	7.88698	236.71	0.000218223	0.016169
MCRS1	microspherule protein 1	7.88696	236.708	0.00014131	0.0126556
PDGFRB	platelet derived growth factor receptor beta	7.88663	236.653	0.000811395	0.032975
TBXT	T-box transcription factor T	7.88035	235.625	0.000613759	0.0281755
RASGRP2	RAS guanyl releasing protein 2	7.87825	235.282	0.000332561	0.0201626
PAQR8	progestin and adipoQ receptor family member 8	7.87817	235.27	0.000739055	0.0312203
OMG	oligodendrocyte myelin glycoprotein	7.87535	234.811	0.000319444	0.0198349
ZSCAN21	zinc finger and SCAN domain containing 21	7.8735	234.508	0.000147622	0.0129565
ZNF143	zinc finger protein 143	7.87083	234.076	0.000296919	0.0191595
ING3	inhibitor of growth family member 3	7.86777	233.579	0.000139173	0.0125461
GOLGA4	golgin A4	7.86766	233.562	0.000167542	0.0139477
ERO1A	endoplasmic reticulum oxidoreductase 1 alpha	7.86759	233.551	0.000587522	0.0274987
GALNT16	polypeptide N-acetylgalactosaminyltransferase 16	7.86511	233.149	0.000684249	0.0299707
PERP	PERP, TP53 apoptosis effector	7.86397	232.966	0.000672233	0.0296805
WASHC3	WASH complex subunit 3	7.86248	232.724	0.000596173	0.0277013
FBN1	fibrillin 1	7.8579	231.988	0.000913886	0.0351745
FHL2	four and a half LIM domains 2	7.85607	231.693	0.000550043	0.0264799
KCNJ10	potassium voltage-gated channel subfamily J member 10	7.85465	231.466	0.000869669	0.0343381
ADORA3	adenosine A3 receptor	7.85295	231.193	0.000421312	0.0230063
FKBP5	FK506 binding protein 5	7.84771	230.354	7.33139e-05	0.00866428
APBB3	amyloid beta precursor protein binding family B member 3	7.8472	230.273	0.00149706	0.0466368
LRMDA	leucine rich melanocyte differentiation associated	7.84407	229.774	0.000576034	0.0271977
KBTBD13	kelch repeat and BTB domain containing 13	7.84245	229.516	0.000454315	0.0239627
IMPG2	interphotoreceptor matrix proteoglycan 2	7.83195	227.852	0.000680235	0.0298615
HLF	HLF, PAR bZIP transcription factor	7.83083	227.675	0.000145631	0.0128555
DDX39A	DExD-box helicase 39A	7.8307	227.655	8.09951e-05	0.00921548
CXCR1	C-X-C motif chemokine receptor 1	7.82764	227.172	0.000988287	0.0367915
FBXO42	F-box protein 42	7.82617	226.941	0.000345454	0.0205966
SLC25A53	solute carrier family 25 member 53	7.82572	226.87	0.000240945	0.0171005
MTFP1	mitochondrial fission process 1	7.82446	226.671	0.000485161	0.0246972
TMA7	translation machinery associated 7 homolog	7.82024	226.009	0.000882078	0.0345994
CACNG6	calcium voltage-gated channel auxiliary subunit gamma 6	7.81973	225.929	0.000514218	0.0255289
SSUH2	ssu-2 homolog (C. elegans)	7.81945	225.886	0.000253914	0.0175902
IMPDH2	inosine monophosphate dehydrogenase 2	7.81177	224.687	0.000518263	0.0256139
ORC2	origin recognition complex subunit 2	7.80862	224.197	0.00044314	0.02369
PRRC2C	proline rich coiled-coil 2C	7.80861	224.195	0.000427335	0.0232061
SURF2	surfeit 2	7.80736	224.001	0.000459928	0.024014
NCOA7	nuclear receptor coactivator 7	7.8071	223.961	0.000533061	0.0260486
SELENOW	selenoprotein W	7.8056	223.727	0.000535141	0.0261193
BRD9	bromodomain containing 9	7.80104	223.022	0.000238283	0.0170114
ZNF397	zinc finger protein 397	7.79567	222.193	0.0006782	0.0298478
ZNF43	zinc finger protein 43	7.79518	222.118	0.000360992	0.021096
FCER1G	Fc fragment of IgE receptor Ig	7.79244	221.697	0.000305866	0.0194265
HIVEP2	human immunodeficiency virus type I enhancer binding protein 2	7.79213	221.649	0.000657615	0.0293078
ESPN	espin	7.78934	221.221	0.000576566	0.0272134
FAXDC2	fatty acid hydroxylase domain containing 2	7.78848	221.089	0.000497089	0.0250181
BMPR1B	bone morphogenetic protein receptor type 1B	7.78533	220.606	0.000141735	0.0126744
CYP51A1	cytochrome P450 family 51 subfamily A member 1	7.78195	220.089	0.000456222	0.0239772
AQP4	aquaporin 4	7.78095	219.937	0.000689705	0.0300939
PAFAH1B2	platelet activating factor acetylhydrolase 1b catalytic subunit 2	7.7782	219.519	0.000618789	0.0282885
IL17RC	interleukin 17 receptor C	7.77631	219.232	0.000104354	0.0105153
PKN1	protein kinase N1	7.76942	218.186	0.000413314	0.0227685
RAPH1	Ras association (RalGDS/AF-6) and pleckstrin homology domains 1	7.76917	218.149	0.000270304	0.0182567
COBL	cordon-bleu WH2 repeat protein	7.76552	217.598	0.00104047	0.0379947
PDZRN3	PDZ domain containing ring finger 3	7.76551	217.596	0.000204041	0.0157375
UBXN11	UBX domain protein 11	7.75623	216.202	0.000265999	0.0181166
SCN4B	sodium voltage-gated channel beta subunit 4	7.75597	216.163	0.000871592	0.0343745
YLPM1	YLP motif containing 1	7.75578	216.134	0.000183934	0.014789
TMEM248	transmembrane protein 248	7.75482	215.991	0.000214986	0.0159982
PRKCZ	protein kinase C zeta	7.75451	215.943	0.000747265	0.0314172
ACVR2B	activin A receptor type 2B	7.75215	215.59	0.000224149	0.0164134
SNX10	sorting nexin 10	7.75057	215.354	0.000680251	0.0298615
BSG	basigin (Ok blood group)	7.74932	215.167	0.000410913	0.0226829
CCDC152	coiled-coil domain containing 152	7.74558	214.611	0.000459681	0.024014
PBX2	PBX homeobox 2	7.74065	213.878	0.000579823	0.0273109
LBH	limb bud and heart development	7.74037	213.838	0.000297194	0.0191682
TMEM163	transmembrane protein 163	7.736	213.191	0.000402794	0.0224136
EXD3	exonuclease 3'-5' domain containing 3	7.7353	213.088	0.00018255	0.0147318
SMAD1	SMAD family member 1	7.72922	212.191	0.000915936	0.0352139
ARHGAP20	Rho GTPase activating protein 20	7.7282	212.041	0.00113057	0.039854
AKAP13	A-kinase anchoring protein 13	7.72455	211.505	0.000598581	0.0277886
ZDHHC17	zinc finger DHHC-type containing 17	7.72384	211.401	0.000952845	0.0360283
PCDHA10	protocadherin alpha 10	7.71831	210.593	0.00100826	0.0372927
MRPL11	mitochondrial ribosomal protein L11	7.71592	210.244	0.00152613	0.0469453
TMEM130	transmembrane protein 130	7.71308	209.831	0.000764446	0.0318131
KLHL38	kelch like family member 38	7.71092	209.517	0.000107141	0.0106401
PAMR1	peptidase domain containing associated with muscle regeneration 1	7.71001	209.384	0.00086732	0.0343005
MED10	mediator complex subunit 10	7.7095	209.311	0.00127434	0.0426053
ATP1B1	ATPase Na+/K+ transporting subunit beta 1	7.70758	209.033	0.00071373	0.0306995
ASAH1	N-acylsphingosine amidohydrolase 1	7.70636	208.855	9.68237e-05	0.0100895
RNF157	ring finger protein 157	7.70489	208.642	0.000996914	0.0370224
MAMDC4	MAM domain containing 4	7.69807	207.659	0.000935322	0.0357294
PRIMPOL	primase and DNA directed polymerase	7.69421	207.104	0.000310441	0.0195457
GPS2	G protein pathway suppressor 2	7.68936	206.409	0.000837073	0.0335777
TBC1D31	TBC1 domain family member 31	7.68913	206.376	0.000369998	0.0213961
GLIPR2	GLI pathogenesis related 2	7.67991	205.061	0.000381987	0.0217579
ZNF786	zinc finger protein 786	7.67461	204.309	0.000714772	0.0307195
CCNA2	cyclin A2	7.67434	204.271	0.000173443	0.0142918
ZNF787	zinc finger protein 787	7.67294	204.072	0.000626721	0.0284569
ACE	angiotensin I converting enzyme	7.66649	203.162	0.000358842	0.0210343
RGS3	regulator of G protein signaling 3	7.66561	203.038	0.000424418	0.0230842
TMEM179B	transmembrane protein 179B	7.6626	202.615	0.000127551	0.0119178
SIPA1L3	signal induced proliferation associated 1 like 3	7.66193	202.521	0.000451614	0.0238737
KIRREL3	kirre like nephrin family adhesion molecule 3	7.65647	201.756	0.00133661	0.0438106
EMX1	empty spiracles homeobox 1	7.65009	200.866	0.000404435	0.0224437
PDE4A	phosphodiesterase 4A	7.64774	200.539	0.000603966	0.0279214
ABCC4	ATP binding cassette subfamily C member 4	7.64552	200.231	0.000290356	0.0189585
ANKRD6	ankyrin repeat domain 6	7.64524	200.193	0.000340586	0.0204506
FAM19A5	family with sequence similarity 19 member A5, C-C motif chemokine like	7.64316	199.903	0.000160268	0.0135891
ZFAND6	zinc finger AN1-type containing 6	7.64266	199.835	0.000889155	0.034758
DAD1	defender against cell death 1	7.64104	199.61	0.000574541	0.027194
MKRN2OS	MKRN2 opposite strand	7.63911	199.343	0.000953482	0.0360291
FSTL4	follistatin like 4	7.6386	199.273	0.000708919	0.0306212
IQCC	IQ motif containing C	7.6347	198.735	0.000814504	0.0330232
GABRA5	gamma-aminobutyric acid type A receptor alpha5 subunit	7.63285	198.48	0.00105761	0.0383481
TMEM183A	transmembrane protein 183A	7.63146	198.29	0.000537554	0.0261707
VSIG10L	V-set and immunoglobulin domain containing 10 like	7.629	197.952	0.000890662	0.0347856
APH1A	aph-1 homolog A, gamma-secretase subunit	7.62747	197.741	0.000848912	0.0338495
RNF130	ring finger protein 130	7.62066	196.811	0.000758856	0.0316926
TGFBR3	transforming growth factor beta receptor 3	7.61752	196.383	0.00058448	0.0274268
TMEM69	transmembrane protein 69	7.61596	196.169	0.000808354	0.0328708
RPTOR	regulatory associated protein of MTOR complex 1	7.61075	195.462	0.000144606	0.0128228
DGKE	diacylglycerol kinase epsilon	7.60595	194.814	0.0010814	0.0388071
CHAD	chondroadherin	7.60501	194.686	0.000389154	0.0219569
CNR1	cannabinoid receptor 1	7.60419	194.576	0.000754621	0.0316225
RRP15	ribosomal RNA processing 15 homolog	7.60172	194.243	0.000556624	0.0266308
ALG1	ALG1, chitobiosyldiphosphodolichol beta-mannosyltransferase	7.59919	193.903	0.000744823	0.0314021
ANKRD33B	ankyrin repeat domain 33B	7.59866	193.832	0.000716531	0.0307528
CIB1	calcium and integrin binding 1	7.59841	193.798	0.000236172	0.0169359
DMTF1	cyclin D binding myb like transcription factor 1	7.59686	193.59	0.00112183	0.0396475
ARRB2	arrestin beta 2	7.59003	192.675	0.000744483	0.0313976
KIF20B	kinesin family member 20B	7.58753	192.342	0.000368398	0.0213556
KCNJ8	potassium voltage-gated channel subfamily J member 8	7.58497	192.001	0.000694977	0.0302069
EVA1A	eva-1 homolog A, regulator of programmed cell death	7.58346	191.8	0.000269401	0.0182402
TGFBR3L	transforming growth factor beta receptor 3 like	7.5802	191.367	0.000430433	0.0233099
FAM69A	family with sequence similarity 69 member A	7.57827	191.111	0.000940482	0.0357972
POLQ	DNA polymerase theta	7.57808	191.086	0.000320303	0.0198353
INTS8	integrator complex subunit 8	7.57159	190.228	0.000510726	0.0254435
KCNA1	potassium voltage-gated channel subfamily A member 1	7.56851	189.823	0.000813733	0.0330232
DNAAF5	dynein axonemal assembly factor 5	7.56713	189.641	0.000927587	0.0354832
FMO1	flavin containing monooxygenase 1	7.56673	189.589	0.00118003	0.0408637
ADCY3	adenylate cyclase 3	7.56645	189.553	0.000559766	0.026726
HS3ST6	heparan sulfate-glucosamine 3-sulfotransferase 6	7.56351	189.166	0.00123493	0.0418277
COPS6	COP9 signalosome subunit 6	7.5614	188.89	0.000386529	0.0218626
MAP3K15	mitogen-activated protein kinase kinase kinase 15	7.55526	188.087	0.000286436	0.0188234
PIH1D1	PIH1 domain containing 1	7.55393	187.915	0.00118253	0.040909
TESK1	testis associated actin remodelling kinase 1	7.55186	187.645	0.000235017	0.0169274
WWC2	WW and C2 domain containing 2	7.55119	187.557	0.00135279	0.0441527
MANBA	mannosidase beta	7.54781	187.118	0.00050884	0.0253855
ARHGAP35	Rho GTPase activating protein 35	7.54709	187.026	0.000310262	0.0195457
EBF1	early B cell factor 1	7.54588	186.869	0.000613585	0.0281755
LIPT2	lipoyl(octanoyl) transferase 2	7.54366	186.582	0.00121112	0.0413868
RTN2	reticulon 2	7.54196	186.362	0.000535739	0.0261392
GSAP	gamma-secretase activating protein	7.54033	186.151	0.00133476	0.043781
FAM160A1	family with sequence similarity 160 member A1	7.53436	185.382	0.000966992	0.036254
TRIM55	tripartite motif containing 55	7.53429	185.373	0.000892475	0.0347856
RAD50	RAD50 double strand break repair protein	7.53021	184.85	0.000968968	0.0363005
RFXAP	regulatory factor X associated protein	7.52926	184.729	0.000235573	0.0169359
PHLPP1	PH domain and leucine rich repeat protein phosphatase 1	7.52636	184.358	0.00113229	0.0398839
PALM	paralemmin	7.52453	184.124	0.000419407	0.0229532
KDM5A	lysine demethylase 5A	7.51924	183.45	0.0012372	0.041874
SHISA2	shisa family member 2	7.51901	183.42	0.000818946	0.0330761
CTNND2	catenin delta 2	7.51873	183.385	0.00118615	0.0410032
C10ORF88	chromosome 10 open reading frame 88	7.51266	182.614	0.000947828	0.0359422
AXL	AXL receptor tyrosine kinase	7.51088	182.39	0.000564063	0.0268725
MRPL47	mitochondrial ribosomal protein L47	7.50989	182.265	0.00124105	0.0419412
RORA	RAR related orphan receptor A	7.50811	182.04	0.000719491	0.0308164
C3	complement C3	7.50691	181.888	0.00021885	0.0162067
RND3	Rho family GTPase 3	7.50681	181.876	0.000214746	0.0159976
GREM2	gremlin 2, DAN family BMP antagonist	7.50497	181.644	0.00112639	0.0397575
CEBPG	CCAAT enhancer binding protein gamma	7.50444	181.577	0.000885437	0.0346718
WDR88	WD repeat domain 88	7.50431	181.561	0.000891812	0.0347856
ERF	ETS2 repressor factor	7.50366	181.479	0.00102121	0.0375091
CHMP5	charged multivesicular body protein 5	7.50349	181.457	0.000436869	0.0235102
CYB5D1	cytochrome b5 domain containing 1	7.50348	181.457	0.000387387	0.0218841
SNCG	synuclein gamma	7.50303	181.399	0.000493889	0.0249571
GRIK4	glutamate ionotropic receptor kainate type subunit 4	7.50261	181.347	0.000274296	0.0184263
ADORA1	adenosine A1 receptor	7.50242	181.324	0.000240782	0.0171005
AATK	apoptosis associated tyrosine kinase	7.49871	180.857	0.000658613	0.0293238
ISM2	isthmin 2	7.49678	180.615	0.000918768	0.0352739
TMEM184B	transmembrane protein 184B	7.49363	180.222	0.000345564	0.0205966
CHRDL2	chordin like 2	7.49094	179.887	0.00108935	0.0389536
WDR5	WD repeat domain 5	7.48456	179.092	0.00114799	0.0401806
ONECUT2	one cut homeobox 2	7.48392	179.013	0.00170216	0.0499044
ZPLD1	zona pellucida like domain containing 1	7.48214	178.792	0.000271337	0.0182902
TEX9	testis expressed 9	7.48179	178.748	0.00078032	0.032188
LACTB	lactamase beta	7.47957	178.475	0.000763104	0.0317831
KCNQ1	potassium voltage-gated channel subfamily Q member 1	7.47837	178.325	0.000367987	0.0213486
MUC2	mucin 2, oligomeric mucus/gel-forming	7.47667	178.116	0.000303086	0.0193575
CAPN2	calpain 2	7.47574	178.001	0.000978597	0.0365794
GSK3B	glycogen synthase kinase 3 beta	7.47533	177.951	0.000580669	0.027332
CNOT6L	CCR4-NOT transcription complex subunit 6 like	7.474	177.787	0.000912767	0.0351413
SMIM24	small integral membrane protein 24	7.47266	177.621	0.00110832	0.0393624
FAM19A3	family with sequence similarity 19 member A3, C-C motif chemokine like	7.47015	177.313	0.000455678	0.0239772
BNC1	basonuclin 1	7.46083	176.17	0.000801724	0.0327563
PLS3	plastin 3	7.46081	176.168	0.000821362	0.0331157
FGFRL1	fibroblast growth factor receptor like 1	7.46035	176.111	0.000780145	0.032188
OLFML3	olfactomedin like 3	7.45839	175.873	0.000369372	0.0213787
LAT	linker for activation of T cells	7.44648	174.427	0.000360882	0.021096
AGTR2	angiotensin II receptor type 2	7.44592	174.359	0.00152194	0.0469258
TRIM28	tripartite motif containing 28	7.44558	174.319	0.00145087	0.0457789
GALNT18	polypeptide N-acetylgalactosaminyltransferase 18	7.44507	174.256	0.00121851	0.0414753
GAS8	growth arrest specific 8	7.44488	174.234	0.000540341	0.0262334
BCL9	B cell CLL/lymphoma 9	7.44346	174.063	0.000963321	0.0362131
VTG2	vitellogenin 2	7.44319	174.029	0.000805795	0.0328167
DEPDC5	DEP domain containing 5	7.44129	173.801	0.000588099	0.0274987
TECTA	tectorin alpha	7.44068	173.728	0.000379672	0.021689
MCAM	melanoma cell adhesion molecule	7.44055	173.712	0.000305458	0.0194265
RASL10B	RAS like family 10 member B	7.44012	173.659	0.000737199	0.0311861
METTL24	methyltransferase like 24	7.43953	173.589	0.00041898	0.0229532
PLA2G4A	phospholipase A2 group IVA	7.43761	173.358	0.00110386	0.0392748
NEURL1	neuralized E3 ubiquitin protein ligase 1	7.43466	173.004	0.00021102	0.0159145
WIZ	widely interspaced zinc finger motifs	7.42882	172.305	0.000214512	0.0159975
KIF3B	kinesin family member 3B	7.42633	172.008	0.000717312	0.0307528
NRXN2	neurexin 2	7.42412	171.745	0.000790197	0.0324145
ZNF615	zinc finger protein 615	7.42211	171.506	0.00135659	0.0441862
RFNG	RFNG O-fucosylpeptide 3-beta-N-acetylglucosaminyltransferase	7.42193	171.485	0.000729755	0.0310413
CCDC177	coiled-coil domain containing 177	7.42184	171.473	0.000877733	0.0345207
TUBGCP3	tubulin gamma complex associated protein 3	7.42029	171.289	0.000321394	0.0198509
CALD1	caldesmon 1	7.41731	170.936	0.000108298	0.0107086
PSMD7	proteasome 26S subunit, non-ATPase 7	7.41425	170.574	0.00149908	0.0466522
NFATC2	nuclear factor of activated T cells 2	7.4132	170.449	0.00167144	0.0494042
PANK1	pantothenate kinase 1	7.41207	170.316	0.00144764	0.0457789
ADD2	adducin 2	7.41204	170.312	0.00047464	0.0244606
CIDEA	cell death-inducing DFFA-like effector a	7.40944	170.006	0.000843353	0.0337253
MYD88	myeloid differentiation primary response 88	7.40331	169.285	0.00147426	0.0462093
EHMT2	euchromatic histone lysine methyltransferase 2	7.3978	168.64	0.00123205	0.0417808
NAXD	NAD(P)HX dehydratase	7.39666	168.506	0.000924704	0.0354321
C17orf75	chromosome 17 open reading frame 75	7.39461	168.267	0.000684897	0.0299793
TMOD1	tropomodulin 1	7.38686	167.366	0.000966256	0.0362527
KIAA1191	KIAA1191	7.38441	167.081	0.000776344	0.03213
SREBF1	sterol regulatory element binding transcription factor 1	7.38032	166.609	0.00133499	0.043781
SOWAHB	sosondowah ankyrin repeat domain family member B	7.37826	166.372	0.00117942	0.0408631
CHST8	carbohydrate sulfotransferase 8	7.3754	166.041	0.000400429	0.0223404
GDPD5	glycerophosphodiester phosphodiesterase domain containing 5	7.37341	165.812	0.00158219	0.0479627
HELB	DNA helicase B	7.36803	165.195	0.00091802	0.0352645
ZFX	zinc finger protein X-linked	7.36489	164.836	0.000778181	0.0321867
ZNF146	zinc finger protein 146	7.36472	164.817	0.000373706	0.0215001
HOXA4	homeobox A4	7.3634	164.666	0.000344864	0.0205966
CHCHD4	coiled-coil-helix-coiled-coil-helix domain containing 4	7.35886	164.149	0.00142547	0.0453943
PACS1	phosphofurin acidic cluster sorting protein 1	7.35835	164.09	0.000781508	0.0322273
PHLDB3	pleckstrin homology like domain family B member 3	7.34743	162.853	0.000731958	0.0310802
MYH13	myosin heavy chain 13	7.3445	162.523	0.00152235	0.0469258
TRMT1L	tRNA methyltransferase 1 like	7.34156	162.192	0.00165096	0.0489991
GPATCH2	G-patch domain containing 2	7.34002	162.02	0.00137328	0.0445026
RIMBP2	RIMS binding protein 2	7.3391	161.916	0.000500386	0.0251084
MS4A4D	membrane-spanning 4-domains, subfamily A, member 4D	7.33404	161.349	0.00067164	0.0296801
CPTP	ceramide-1-phosphate transfer protein	7.33324	161.259	0.000174696	0.0143603
MYT1	myelin transcription factor 1	7.32977	160.872	0.00140252	0.0450042
SACM1L	SAC1 like phosphatidylinositide phosphatase	7.32882	160.766	0.00108428	0.0388804
SEC13	SEC13 homolog, nuclear pore and COPII coat complex component	7.32835	160.714	0.00127575	0.0426317
CRYBA4	crystallin beta A4	7.32708	160.572	0.00165053	0.0489991
ATG14	autophagy related 14	7.31879	159.652	0.000543367	0.0262839
ATAD1	ATPase family, AAA domain containing 1	7.31693	159.447	0.000747461	0.0314172
GSX1	GS homeobox 1	7.31409	159.133	0.00137073	0.0444546
PLEKHG4B	pleckstrin homology and RhoGEF domain containing G4B	7.3101	158.693	0.000781839	0.0322313
SAP30L	SAP30 like	7.30908	158.582	0.00036281	0.0211655
NFIL3	nuclear factor, interleukin 3 regulated	7.30894	158.566	0.000549039	0.0264594
KCNAB1	potassium voltage-gated channel subfamily A member regulatory beta subunit 1	7.30675	158.325	0.000674945	0.0297694
TBC1D30	TBC1 domain family member 30	7.30414	158.04	0.000277313	0.0185087
ST8SIA6	ST8 alpha-N-acetyl-neuraminide alpha-2,8-sialyltransferase 6	7.3033	157.947	0.00169022	0.049724
BCAP31	B cell receptor associated protein 31	7.30133	157.731	0.000899884	0.0349035
DVL2	dishevelled segment polarity protein 2	7.29741	157.304	0.000631571	0.0285578
SOAT2	sterol O-acyltransferase 2	7.29546	157.091	0.00148018	0.0463211
TGFA	transforming growth factor alpha	7.28918	156.409	0.00129942	0.0431186
CXorf58	chromosome X open reading frame 58	7.2856	156.021	0.000746791	0.0314172
ITGB3BP	integrin subunit beta 3 binding protein	7.28344	155.788	0.000278012	0.0185306
CAPN3	calpain 3	7.27937	155.349	0.000216329	0.0160881
SMARCAL1	SWI/SNF related, matrix associated, actin dependent regulator of chromatin, subfamily a like 1	7.27734	155.131	0.00108411	0.0388804
CEACAM20	carcinoembryonic antigen related cell adhesion molecule 20	7.27449	154.824	0.000684891	0.0299793
MAP2K3	mitogen-activated protein kinase kinase 3	7.27267	154.629	0.0011539	0.0402838
ZFP91	ZFP91 zinc finger protein	7.27039	154.385	0.000845057	0.0337443
YWHAG	tyrosine 3-monooxygenase/tryptophan 5-monooxygenase activation protein gamma	7.27001	154.344	0.00157046	0.0477123
AAR2	AAR2 splicing factor homolog	7.26921	154.259	0.000892315	0.0347856
TMEM229B	transmembrane protein 229B	7.26498	153.807	0.000658126	0.029321
WIPI2	WD repeat domain, phosphoinositide interacting 2	7.26495	153.804	0.0008524	0.033892
ANGPTL2	angiopoietin like 2	7.26249	153.542	0.000579737	0.0273109
GRAMD4	GRAM domain containing 4	7.25433	152.676	0.000424127	0.023084
RHBDL3	rhomboid like 3	7.25021	152.241	0.000573595	0.0271759
ETNK1	ethanolamine kinase 1	7.24959	152.175	0.00112851	0.0397967
EEVS	2-epi-5-epi-valiolone synthase	7.24873	152.085	0.00167525	0.0494539
GPRIN1	G protein regulated inducer of neurite outgrowth 1	7.24865	152.076	0.000582392	0.0273756
MAPK8	mitogen-activated protein kinase 8	7.24747	151.952	0.000604132	0.0279214
INKA2	inka box actin regulator 2	7.24644	151.843	0.000630436	0.0285363
SLC15A5	solute carrier family 15 member 5	7.24419	151.607	0.000242431	0.0171667
CNGB1	cyclic nucleotide gated channel beta 1	7.24329	151.512	0.000767151	0.0318727
LHB	luteinizing hormone beta polypeptide	7.24237	151.416	0.00081394	0.0330232
GOSR2	golgi SNAP receptor complex member 2	7.24037	151.205	0.000346777	0.0206454
DMPK	DM1 protein kinase	7.23687	150.839	0.0013772	0.0445697
ICAM1	intercellular adhesion molecule 1	7.23438	150.579	0.00167305	0.049441
STARD10	StAR related lipid transfer domain containing 10	7.23288	150.423	0.000299509	0.0192543
RNF150	ring finger protein 150	7.23055	150.18	0.00071039	0.0306294
HEXA	hexosaminidase subunit alpha	7.2294	150.06	0.000966135	0.0362527
TTLL6	tubulin tyrosine ligase like 6	7.22525	149.629	0.00105151	0.0382034
TPRG1L	tumor protein p63 regulated 1 like	7.2186	148.942	0.00131854	0.0434731
KCTD5	potassium channel tetramerization domain containing 5	7.21838	148.919	0.000460355	0.024014
RBFOX3	RNA binding fox-1 homolog 3	7.21713	148.79	0.00105482	0.0382759
TMEM14B	transmembrane protein 14B	7.21627	148.701	0.00128665	0.0428501
GRIN3A	glutamate ionotropic receptor NMDA type subunit 3A	7.21583	148.656	0.000964019	0.0362131
MEF2C	myocyte enhancer factor 2C	7.21369	148.436	0.000544154	0.0262839
C7orf26	chromosome 7 open reading frame 26	7.21191	148.252	0.000868119	0.0343064
ST7	suppression of tumorigenicity 7	7.21105	148.164	0.00143057	0.0454966
SMIM13	small integral membrane protein 13	7.20799	147.849	0.000893278	0.0347856
KIF19	kinesin family member 19	7.2047	147.513	0.000645921	0.028984
ARHGDIA	Rho GDP dissociation inhibitor alpha	7.20415	147.457	0.00059965	0.027816
SLC6A7	solute carrier family 6 member 7	7.20374	147.415	0.000772987	0.0320104
TMEM161A	transmembrane protein 161A	7.20277	147.316	0.00076063	0.0317377
ZNF512B	zinc finger protein 512B	7.20211	147.248	0.000404127	0.0224437
IFT22	intraflagellar transport 22	7.20193	147.23	0.00145838	0.0459106
ZBTB7C	zinc finger and BTB domain containing 7C	7.2016	147.196	0.000232754	0.0168018
KLF15	Kruppel like factor 15	7.19887	146.918	0.000971203	0.0363524
NUDT18	nudix hydrolase 18	7.19356	146.378	0.00144544	0.0457654
SLC25A37	solute carrier family 25 member 37	7.19217	146.238	0.00144106	0.0457424
AKR1D1	aldo-keto reductase family 1 member D1	7.1905	146.069	0.000957533	0.036079
SYNDIG1	synapse differentiation inducing 1	7.19031	146.049	0.000886961	0.0347072
SLC7A2	solute carrier family 7 member 2	7.18936	145.953	0.000484784	0.0246948
FGD6	FYVE, RhoGEF and PH domain containing 6	7.18735	145.75	0.000537168	0.0261676
DNAI1	dynein axonemal intermediate chain 1	7.18734	145.749	0.00084621	0.0337708
TTYH1	tweety family member 1	7.18667	145.682	0.00100952	0.0373092
RIPOR2	RHO family interacting cell polarization regulator 2	7.18616	145.63	0.000419128	0.0229532
OPN3	opsin 3	7.18498	145.51	0.000950412	0.0359743
GFRA2	GDNF family receptor alpha 2	7.18305	145.316	0.000409285	0.0226113
ZNF385C	zinc finger protein 385C	7.18123	145.132	0.000294254	0.0190681
DDA1	DET1 and DDB1 associated 1	7.17873	144.881	0.00102354	0.0375345
CERS6	ceramide synthase 6	7.17419	144.426	0.000624879	0.0284157
EZR	ezrin	7.17222	144.229	0.00102932	0.0377162
TBKBP1	TBK1 binding protein 1	7.17132	144.139	0.00161825	0.0486481
KIF11	kinesin family member 11	7.17068	144.075	0.000909368	0.0350528
HIST1H1D	histone cluster 1 H1 family member d	7.16599	143.608	0.000446044	0.0237653
RABEPK	Rab9 effector protein with kelch motifs	7.15651	142.667	0.00104136	0.0380053
PMP22	peripheral myelin protein 22	7.1561	142.627	0.00072414	0.0309287
CACNA1G	calcium voltage-gated channel subunit alpha1 G	7.15151	142.174	0.000725875	0.030974
SAMD12	sterile alpha motif domain containing 12	7.1511	142.133	0.000805025	0.0328131
GSKIP	GSK3B interacting protein	7.15	142.025	0.000412643	0.0227498
NR1D1	nuclear receptor subfamily 1 group D member 1	7.14797	141.825	0.000966962	0.036254
SOBP	sine oculis binding protein homolog	7.14673	141.703	0.00116271	0.0404679
TMEM68	transmembrane protein 68	7.14619	141.65	0.000957349	0.036079
SLC9A3	solute carrier family 9 member A3	7.14459	141.493	0.00162762	0.0487448
EFHD2	EF-hand domain family member D2	7.14323	141.36	0.000765297	0.0318358
FAM49A	family with sequence similarity 49 member A	7.14291	141.329	0.000382289	0.0217586
UBE2R2	ubiquitin conjugating enzyme E2 R2	7.14255	141.293	0.0016107	0.0484952
THAP11	THAP domain containing 11	7.14197	141.236	0.000337228	0.0203289
STAT3	signal transducer and activator of transcription 3	7.13906	140.952	0.00033412	0.0202226
CCL3	C-C motif chemokine ligand 3	7.13903	140.949	0.00147088	0.0461752
CDC14A	cell division cycle 14A	7.13459	140.516	0.00104051	0.0379947
PRKAR1B	protein kinase cAMP-dependent type I regulatory subunit beta	7.1341	140.468	0.0010456	0.0380692
MAPK8IP1	mitogen-activated protein kinase 8 interacting protein 1	7.12777	139.853	0.00110987	0.0393738
SORD	sorbitol dehydrogenase	7.12555	139.638	0.000817221	0.033042
MEPCE	methylphosphate capping enzyme	7.1238	139.469	0.00134523	0.0439805
DPF3	double PHD fingers 3	7.12322	139.413	0.000699811	0.0303422
KIF26B	kinesin family member 26B	7.12322	139.413	0.000193342	0.0152544
OR52D1	olfactory receptor family 52 subfamily D member 1	7.11922	139.027	0.000738784	0.0312203
SLC22A1	solute carrier family 22 member 1	7.11883	138.989	0.0007101	0.0306294
ADAM11	ADAM metallopeptidase domain 11	7.11846	138.953	0.00145232	0.0458069
LIPE	lipase E, hormone sensitive type	7.1123	138.361	0.00149959	0.0466522
CILP	cartilage intermediate layer protein	7.11168	138.302	0.000587813	0.0274987
DIAPH3	diaphanous related formin 3	7.10172	137.351	0.000735221	0.0311408
B3GNT2	UDP-GlcNAc:betaGal beta-1,3-N-acetylglucosaminyltransferase 2	7.10144	137.324	0.00125938	0.0423419
SHOC2	SHOC2, leucine rich repeat scaffold protein	7.09482	136.695	0.000910042	0.0350528
ARHGEF10L	Rho guanine nucleotide exchange factor 10 like	7.09177	136.406	0.00104865	0.0381299
CD9	CD9 molecule	7.0915	136.381	0.000445077	0.0237381
NPR1	natriuretic peptide receptor 1	7.08584	135.847	0.000630155	0.0285363
ASCL5	achaete-scute family bHLH transcription factor 5	7.08493	135.761	0.000755466	0.0316279
PRKD2	protein kinase D2	7.08438	135.71	0.00146823	0.0461236
TFE3	transcription factor binding to IGHM enhancer 3	7.08039	135.335	0.000659509	0.0293351
FAM20A	FAM20A, golgi associated secretory pathway pseudokinase	7.07843	135.151	0.000300751	0.0192855
TXLNB	taxilin beta	7.07829	135.138	0.0013779	0.0445792
SVIL	supervillin	7.07485	134.816	0.000760934	0.0317407
CDK5R1	cyclin dependent kinase 5 regulatory subunit 1	7.07355	134.695	0.00067512	0.0297694
OTUD7B	OTU deubiquitinase 7B	7.0698	134.345	0.000706197	0.0305248
CD48	CD48 molecule	7.06561	133.956	0.000617797	0.0282665
LRRC38	leucine rich repeat containing 38	7.05863	133.309	0.00050088	0.0251084
RDH8	retinol dehydrogenase 8	7.05519	132.991	0.000648543	0.0290542
GK5	glycerol kinase 5	7.05268	132.76	0.000910213	0.0350528
FBXO15	F-box protein 15	7.04528	132.081	0.00107255	0.0386106
DTNBP1	dystrobrevin binding protein 1	7.04468	132.026	0.00151643	0.046874
ETS2	ETS proto-oncogene 2, transcription factor	7.03317	130.977	0.00103236	0.0378177
P4HTM	prolyl 4-hydroxylase, transmembrane	7.02761	130.473	0.000882737	0.0346055
ORC1	origin recognition complex subunit 1	7.02023	129.808	0.000405859	0.0225022
TRIM29	tripartite motif containing 29	7.01532	129.366	0.00166847	0.0493269
BAIAP2	BAI1 associated protein 2	7.01271	129.132	0.00163111	0.0487448
FYN	FYN proto-oncogene, Src family tyrosine kinase	7.01103	128.983	0.0013849	0.0447347
LRRC8D	leucine rich repeat containing 8 VRAC subunit D	7.00949	128.845	0.00147418	0.0462093
L2HGDH	L-2-hydroxyglutarate dehydrogenase	7.00696	128.619	0.000549615	0.0264686
NWD1	NACHT and WD repeat domain containing 1	7.00678	128.603	0.000893657	0.0347856
PORCN	porcupine O-acyltransferase	7.00409	128.363	0.000805829	0.0328167
SLC52A3	solute carrier family 52 member 3	7.00253	128.224	0.000897818	0.0348685
EYS	eyes shut homolog (Drosophila)	7.0002	128.017	0.000655226	0.0292677
SLCO4A1	solute carrier organic anion transporter family member 4A1	6.99888	127.901	0.00024131	0.017105
PYGO2	pygopus family PHD finger 2	6.99882	127.895	0.0011501	0.0402227
DCC	DCC netrin 1 receptor	6.99794	127.818	0.00134889	0.0440687
A2ML1	alpha-2-macroglobulin like 1	6.98942	127.064	0.000879241	0.0345473
CTTNBP2NL	CTTNBP2 N-terminal like	6.98529	126.701	0.0010588	0.0383772
PRDM2	PR/SET domain 2	6.97697	125.973	0.000903908	0.0349864
TAAR6	trace amine associated receptor 6	6.97282	125.611	0.00132991	0.0437167
UBE2E2	ubiquitin conjugating enzyme E2 E2	6.97063	125.42	0.000817371	0.033042
NPL	N-acetylneuraminate pyruvate lyase	6.96778	125.173	0.00129352	0.0429643
PELP1	proline, glutamate and leucine rich protein 1	6.96613	125.03	0.00162782	0.0487448
CXCR2	C-X-C motif chemokine receptor 2	6.96353	124.805	0.000513025	0.0255017
PPP1R3A	protein phosphatase 1 regulatory subunit 3A	6.95988	124.49	0.00150208	0.0466522
ABCB9	ATP binding cassette subfamily B member 9	6.95782	124.311	0.000351789	0.0208321
PTCHD3	patched domain containing 3	6.95719	124.258	0.000472748	0.0243906
KDF1	keratinocyte differentiation factor 1	6.95484	124.055	0.00169776	0.0498711
NOMO2	NODAL modulator 2	6.9546	124.035	0.00124756	0.0420786
LPCAT1	lysophosphatidylcholine acyltransferase 1	6.94916	123.568	0.00112106	0.0396425
SURF4	surfeit 4	6.94798	123.467	0.00139334	0.0448703
PTPN22	protein tyrosine phosphatase, non-receptor type 22	6.9463	123.323	0.000825513	0.0332635
TMEM178A	transmembrane protein 178A	6.9462	123.315	0.000458578	0.0240022
DESI1	desumoylating isopeptidase 1	6.94236	122.987	0.00123799	0.0418891
FNTB	farnesyltransferase, CAAX box, beta	6.94146	122.91	0.00170335	0.049918
TRIM66	tripartite motif containing 66	6.94109	122.878	0.000937086	0.0357321
IRX3	iroquois homeobox 3	6.93782	122.6	0.00135397	0.0441717
TNNC1	troponin C1, slow skeletal and cardiac type	6.93393	122.271	0.00153725	0.0471305
CXCR5	C-X-C motif chemokine receptor 5	6.9334	122.226	0.00143573	0.0456191
PNPLA8	patatin like phospholipase domain containing 8	6.93243	122.143	0.00123526	0.0418277
RXFP2	relaxin family peptide receptor 2	6.92904	121.857	0.00126623	0.0424526
SLC2A9	solute carrier family 2 member 9	6.92296	121.344	0.000908394	0.0350528
BLOC1S2	biogenesis of lysosomal organelles complex 1 subunit 2	6.92166	121.235	0.000864861	0.0342466
AHRR	aryl-hydrocarbon receptor repressor	6.9164	120.793	0.000667925	0.029585
LPCAT4	lysophosphatidylcholine acyltransferase 4	6.91151	120.385	0.000448076	0.0238187
ADAMTS14	ADAM metallopeptidase with thrombospondin type 1 motif 14	6.91127	120.365	0.0016123	0.0485223
SIX4	SIX homeobox 4	6.91039	120.292	0.000736628	0.0311774
IPO13	importin 13	6.90203	119.597	0.000631645	0.0285578
STRN	striatin	6.90176	119.574	0.00136382	0.044331
PRTFDC1	phosphoribosyl transferase domain containing 1	6.90122	119.529	0.000456122	0.0239772
GALM	galactose mutarotase	6.89914	119.357	0.00156691	0.0476677
LRFN2	leucine rich repeat and fibronectin type III domain containing 2	6.89476	118.995	0.000983723	0.0367011
NHLRC2	NHL repeat containing 2	6.89112	118.696	0.000484608	0.0246948
WDR6	WD repeat domain 6	6.88507	118.198	0.00156083	0.0475669
TMEM179	transmembrane protein 179	6.88351	118.071	0.000637369	0.0287599
ESAM	endothelial cell adhesion molecule	6.88293	118.023	0.000687558	0.0300482
ITSN1	intersectin 1	6.88154	117.91	0.000561394	0.0267732
CSMD2	CUB and Sushi multiple domains 2	6.87915	117.715	0.00121784	0.0414628
NCK2	NCK adaptor protein 2	6.87709	117.547	0.000930618	0.0355794
CHRM4	cholinergic receptor muscarinic 4	6.87672	117.517	0.00132619	0.0436277
XKR6	XK related 6	6.87304	117.218	0.000998619	0.0370257
THUMPD1	THUMP domain containing 1	6.86948	116.929	0.00119499	0.0411742
MRPL54	mitochondrial ribosomal protein L54	6.86838	116.839	0.000570205	0.0270432
GABRR2	gamma-aminobutyric acid type A receptor rho2 subunit	6.86818	116.823	0.000551778	0.0265327
ZBTB22	zinc finger and BTB domain containing 22	6.86629	116.67	0.000491833	0.0249445
STX2	syntaxin 2	6.86615	116.658	0.00101271	0.0373829
FBLN2	fibulin 2	6.86598	116.645	0.000684265	0.0299707
PMS1	PMS1 homolog 1, mismatch repair system component	6.86118	116.257	0.00139824	0.0449202
RNH1	ribonuclease/angiogenin inhibitor 1	6.85611	115.85	0.00119676	0.0411755
BCL2L10	BCL2 like 10	6.85265	115.572	0.00139742	0.0449182
BICD2	BICD cargo adaptor 2	6.84994	115.355	0.00149465	0.0465775
ADCY9	adenylate cyclase 9	6.84868	115.255	0.000609777	0.0280666
CPT1A	carnitine palmitoyltransferase 1A	6.84541	114.994	0.00158782	0.048038
SLC35B2	solute carrier family 35 member B2	6.84504	114.964	0.000852242	0.033892
GORASP2	golgi reassembly stacking protein 2	6.84463	114.932	0.00149146	0.0465469
FOXP2	forkhead box P2	6.83872	114.461	0.00118837	0.0410492
CHRD	chordin	6.83358	114.055	0.00104921	0.0381375
SLC17A6	solute carrier family 17 member 6	6.83291	114.002	0.000950768	0.0359743
RC3H2	ring finger and CCCH-type domains 2	6.83247	113.967	0.00117826	0.0408331
TSPAN3	tetraspanin 3	6.82768	113.589	0.000634008	0.0286432
ADGRG3	adhesion G protein-coupled receptor G3	6.8247	113.355	0.00102269	0.0375232
OTUD5	OTU deubiquitinase 5	6.82238	113.173	0.000538216	0.0261857
ARHGAP17	Rho GTPase activating protein 17	6.82108	113.07	0.000834618	0.0335419
ANKFN1	ankyrin repeat and fibronectin type III domain containing 1	6.81673	112.73	0.00142214	0.0453353
SOX4	SRY-box 4	6.81579	112.657	0.00158702	0.048031
TTC21A	tetratricopeptide repeat domain 21A	6.81344	112.473	0.00142386	0.0453642
TRIM24	tripartite motif containing 24	6.80749	112.01	0.000985411	0.0367441
TAF1C	TATA-box binding protein associated factor, RNA polymerase I subunit C	6.80726	111.992	0.000455262	0.0239743
NEUROD2	neuronal differentiation 2	6.7993	111.376	0.001085	0.038891
NLGN4X	neuroligin 4 X-linked	6.79724	111.218	0.000746051	0.0314155
KCND3	potassium voltage-gated channel subfamily D member 3	6.79299	110.89	0.000946874	0.0359409
CYP3A4	cytochrome P450 family 3 subfamily A member 4	6.78872	110.562	0.00149808	0.0466476
ERVFRD-1	endogenous retrovirus group FRD member 1, envelope	6.78789	110.499	0.000882612	0.0346055
GNAL	G protein subunit alpha L	6.78124	109.991	0.00151376	0.0468281
TACR1	tachykinin receptor 1	6.77888	109.811	0.000756169	0.0316284
ETAA1	ETAA1, ATR kinase activator	6.77363	109.413	0.00121315	0.0413908
SERINC4	serine incorporator 4	6.76376	108.666	0.00131417	0.0433655
JELT	Jeltraxin	6.76353	108.649	0.00152805	0.0469847
PTPRG	protein tyrosine phosphatase, receptor type G	6.7635	108.647	0.000857275	0.0340246
ADAR	adenosine deaminase, RNA specific	6.7611	108.466	0.000721525	0.030865
CD300LF	CD300 molecule like family member f	6.7592	108.324	0.000618566	0.0282885
RND1	Rho family GTPase 1	6.7468	107.396	0.00142262	0.0453353
IP6K1	inositol hexakisphosphate kinase 1	6.74629	107.358	0.00126699	0.0424526
TNFRSF6B	TNF receptor superfamily member 6b	6.73653	106.635	0.00135898	0.0442002
ITLN1	intelectin 1	6.73129	106.248	0.000999475	0.0370474
IPPK	inositol-pentakisphosphate 2-kinase	6.72605	105.863	0.000538783	0.026204
ZNF350	zinc finger protein 350	6.71445	105.015	0.00115318	0.0402838
FGL2	fibrinogen like 2	6.71185	104.826	0.0012281	0.0416897
HTT	huntingtin	6.70838	104.574	0.00164623	0.0489834
RAB26	RAB26, member RAS oncogene family	6.70352	104.222	0.000748038	0.0314222
SLC25A16	solute carrier family 25 member 16	6.70339	104.213	0.00152431	0.0469326
KDM4B	lysine demethylase 4B	6.70265	104.159	0.000499613	0.0250979
STXBP5	syntaxin binding protein 5	6.69241	103.422	0.000653721	0.0292195
SLC7A5	solute carrier family 7 member 5	6.6886	103.15	0.00116395	0.0404858
CREBRF	CREB3 regulatory factor	6.66614	101.557	0.00133029	0.0437167
P2RY6	pyrimidinergic receptor P2Y6	6.6589	101.048	0.00162611	0.0487246
KIAA0825	KIAA0825	6.65628	100.865	0.00100759	0.0372879
ANXA4	annexin A4	6.65261	100.608	0.00129677	0.0430412
EIF4ENIF1	eukaryotic translation initiation factor 4E nuclear import factor 1	6.65254	100.604	0.00119614	0.0411755
OSGIN2	oxidative stress induced growth inhibitor family member 2	6.64302	99.942	0.000925417	0.0354443
POC1A	POC1 centriolar protein A	6.63109	99.1189	0.00133771	0.0438179
DRP2	dystrophin related protein 2	6.61727	98.1743	0.00135903	0.0442002
ZNF638	zinc finger protein 638	6.60979	97.6661	0.00150054	0.0466522
CHCHD3	coiled-coil-helix-coiled-coil-helix domain containing 3	6.60973	97.6625	0.00133555	0.0437889
GPR142	G protein-coupled receptor 142	6.6009	97.0666	0.00125721	0.0422999
ELOVL6	ELOVL fatty acid elongase 6	6.58927	96.287	0.00100916	0.0373057
CLDN9	claudin 9	6.58538	96.0276	0.00144871	0.0457789
DNAH1	dynein axonemal heavy chain 1	6.57883	95.593	0.000995926	0.0370057
APP	amyloid beta precursor protein	6.56313	94.5579	0.00131964	0.0434839
TBC1D25	TBC1 domain family member 25	6.56256	94.521	0.00150104	0.0466522
IGFN1	immunoglobulin-like and fibronectin type III domain containing 1	6.55563	94.0679	0.00119712	0.0411755
PENK	proenkephalin	6.55555	94.0629	0.000897097	0.0348685
DCSTAMP	dendrocyte expressed seven transmembrane protein	6.55542	94.0541	0.00106505	0.0384817
DNAJC27	DnaJ heat shock protein family (Hsp40) member C27	6.55493	94.0222	0.00136593	0.0443513
C1ORF159	chromosome 1 open reading frame 159	6.55046	93.7316	0.00121582	0.0414292
PPFIBP2	PPFIA binding protein 2	6.54286	93.2389	0.00152643	0.0469453
ZEB1	zinc finger E-box binding homeobox 1	6.54132	93.1392	0.00153485	0.0470989
BTBD7	BTB domain containing 7	6.53646	92.8263	0.00151108	0.0467977
CH25H	cholesterol 25-hydroxylase	6.53458	92.7055	0.00049729	0.0250181
BPTF	bromodomain PHD finger transcription factor	6.52906	92.3515	0.00153177	0.0470422
SFSWAP	splicing factor SWAP	6.52112	91.8443	0.00114265	0.0400639
AQP11	aquaporin 11	6.51881	91.6972	0.00115947	0.040396
DCDC2	doublecortin domain containing 2	6.51859	91.6833	0.00121199	0.0413868
USP32	ubiquitin specific peptidase 32	6.51828	91.6641	0.00152618	0.0469453
PDGFD	platelet derived growth factor D	6.5133	91.348	0.00153127	0.0470415
BCL2L13	BCL2 like 13	6.51263	91.3056	0.00111418	0.0394935
DNAAF4	dynein axonemal assembly factor 4	6.51257	91.3016	0.00128789	0.0428707
OTOS	otospiralin	6.51214	91.2742	0.00142819	0.0454543
SLITRK5	SLIT and NTRK like family member 5	6.50816	91.0231	0.00150462	0.0466925
GCNT3	glucosaminyl (N-acetyl) transferase 3, mucin type	6.50727	90.9668	0.00146101	0.0459447
TET3	tet methylcytosine dioxygenase 3	6.50122	90.586	0.00164288	0.0489387
FZR1	fizzy and cell division cycle 20 related 1	6.49952	90.4795	0.0013331	0.0437712
MED26	mediator complex subunit 26	6.49238	90.0327	0.00152356	0.0469258
LGI3	leucine rich repeat LGI family member 3	6.48994	89.881	0.000862684	0.0341951
EPSTI1	epithelial stromal interaction 1	6.48339	89.4734	0.00106553	0.0384891
XRCC6	X-ray repair cross complementing 6	6.48289	89.4425	0.000586302	0.0274748
ELMSAN1	ELM2 and Myb/SANT domain containing 1	6.47308	88.8365	0.00131162	0.0433456
NETO2	neuropilin and tolloid like 2	6.47072	88.6912	0.00130771	0.0432512
FLVCR2	feline leukemia virus subgroup C cellular receptor family member 2	6.44646	87.2125	0.00144304	0.0457426
PRR14L	proline rich 14 like	6.43513	86.5302	0.00127234	0.0425696
RBM33	RNA binding motif protein 33	6.43018	86.234	0.00126256	0.0423703
SYNGAP1	synaptic Ras GTPase activating protein 1	6.42102	85.688	0.000803401	0.0327723
VCAN	versican	6.41955	85.6006	0.00104637	0.0380872
ARSE	arylsulfatase E (chondrodysplasia punctata 1)	6.41758	85.4839	0.0016444	0.0489631
ZNF253	zinc finger protein 253	6.41638	85.413	0.000926721	0.03546
OSBP2	oxysterol binding protein 2	6.40031	84.4669	0.00145035	0.0457789
SPRED2	sprouty related EVH1 domain containing 2	6.39509	84.1616	0.000877128	0.0345207
CD82	CD82 molecule	6.39067	83.904	0.00129976	0.0431194
HMX3	H6 family homeobox 3	6.38739	83.7136	0.00108515	0.038891
NRIP2	nuclear receptor interacting protein 2	6.38496	83.5728	0.00164818	0.0489919
PHACTR1	phosphatase and actin regulator 1	6.37959	83.2625	0.000956548	0.036079
SHISAL2A	shisa like 2A	6.36725	82.553	0.00116245	0.0404679
SLC39A3	solute carrier family 39 member 3	6.36356	82.342	0.00164858	0.0489919
KCNJ3	potassium voltage-gated channel subfamily J member 3	6.36239	82.2755	0.00120537	0.0413248
LRP6	LDL receptor related protein 6	6.35787	82.0178	0.00140456	0.0450042
CLHC1	clathrin heavy chain linker domain containing 1	6.35496	81.8527	0.00121981	0.0414887
FOXP4	forkhead box P4	6.35448	81.8253	0.00152164	0.0469258
TERB1	telomere repeat binding bouquet formation protein 1	6.3496	81.5494	0.00137491	0.0445376
TMEM110-MUSTN1	TMEM110-MUSTN1 readthrough	6.34688	81.3957	0.00133212	0.0437494
CPEB3	cytoplasmic polyadenylation element binding protein 3	6.34547	81.3162	0.00169841	0.049873
FOXN4	forkhead box N4	6.32696	80.2797	0.00151908	0.0469258
ARL4C	ADP ribosylation factor like GTPase 4C	6.3132	79.5172	0.00168763	0.0497118
MGAT3	mannosyl (beta-1,4-)-glycoprotein beta-1,4-N-acetylglucosaminyltransferase	6.31235	79.4706	0.00120644	0.0413372
MYOCD	myocardin	6.31142	79.4195	0.00117359	0.040743
HNF1B	HNF1 homeobox B	6.30658	79.1532	0.000942133	0.0358402
TENT4A	terminal nucleotidyltransferase 4A [	6.29766	78.6656	0.000749779	0.0314836
SLC43A3	solute carrier family 43 member 3	6.28657	78.0631	0.00112268	0.0396569
HOXA10	homeobox A10	6.28623	78.0448	0.00161118	0.048499
NIPSNAP2	nipsnap homolog 2	6.28542	78.001	0.00104012	0.0379947
GAS1	growth arrest specific 1	6.27645	77.5177	0.00118798	0.0410492
GIPC1	GIPC PDZ domain containing family member 1	6.26419	76.8614	0.00165802	0.0491555
SSH2	slingshot protein phosphatase 2	6.25698	76.4785	0.000755788	0.0316284
SAMD14	sterile alpha motif domain containing 14	6.24701	75.9519	0.00140423	0.0450042
ZMAT4	zinc finger matrin-type 4	6.23316	75.2262	0.00148086	0.0463318
THEMIS	thymocyte selection associated	6.21786	74.4325	0.00139307	0.0448703
HEPACAM2	HEPACAM family member 2	6.20294	73.6667	0.00157275	0.0477712
NHSL1	NHS like 1	6.19548	73.2869	0.00144258	0.0457426
ZSCAN20	zinc finger and SCAN domain containing 20	6.19264	73.1424	0.00145086	0.0457789
AGFG1	ArfGAP with FG repeats 1	6.19223	73.1217	0.00122635	0.0416596
ATF2	activating transcription factor 2	6.17455	72.2313	0.00166204	0.0492322
LRPPRC	leucine rich pentatricopeptide repeat containing	6.13693	70.3719	0.00151052	0.0467909
SYT14	synaptotagmin 14	6.12015	69.5581	0.0015583	0.047532
RELA	RELA proto-oncogene, NF-kB subunit	6.11667	69.3906	0.000988835	0.0368019
SLC6A17	solute carrier family 6 member 17	6.07382	67.36	0.00137814	0.0445792
HDAC4	histone deacetylase 4	5.99675	63.8561	0.00144046	0.0457357
RXFP3	relaxin family peptide receptor 3	5.89119	59.3508	0.00143348	0.0455756
MTA2	metastasis associated 1 family member 2	-5.87059	-58.509	0.00164914	0.0489926
GJB2	gap junction protein beta 2	-5.95692	-62.1171	0.00156974	0.0477009
FNBP1	formin binding protein 1	-6.05805	-66.6276	0.00127194	0.0425664
ZNRF3	zinc and ring finger 3	-6.08604	-67.9329	0.00101984	0.0374849
CSRNP3	cysteine and serine rich nuclear protein 3	-6.08646	-67.9528	0.00119554	0.0411755
FRMD5	FERM domain containing 5	-6.09277	-68.2507	0.00131418	0.0433655
TRIM50	tripartite motif containing 50	-6.11546	-69.3324	0.00123829	0.0418891
TNFRSF19	TNF receptor superfamily member 19	-6.13782	-70.4153	0.00135554	0.0441834
CLIP3	CAP-Gly domain containing linker protein 3	-6.14249	-70.6435	0.000844473	0.0337419
LYPD1	LY6/PLAUR domain containing 1	-6.14903	-70.9649	0.00161981	0.048665
PCDHGC3	protocadherin gamma subfamily C, 3	-6.19837	-73.4335	0.00121465	0.0414155
ZBTB21	zinc finger and BTB domain containing 21	-6.19893	-73.4624	0.00117417	0.040743
P2RY8	P2Y receptor family member 8	-6.22148	-74.6196	0.0014401	0.0457357
AKR1B15	aldo-keto reductase family 1 member B15	-6.22718	-74.9146	0.000958124	0.036079
CHRNG	cholinergic receptor nicotinic gamma subunit	-6.24725	-75.9642	0.0015956	0.0481884
DLGAP1	DLG associated protein 1	-6.26114	-76.6994	0.0010137	0.0373829
DLGAP2	DLG associated protein 2	-6.26493	-76.9012	0.00119423	0.0411689
NCBP1	nuclear cap binding protein subunit 1	-6.27772	-77.586	0.00167557	0.0494539
HTR3C	5-hydroxytryptamine receptor 3C	-6.28363	-77.9041	0.00167562	0.0494539
DBP	D-box binding PAR bZIP transcription factor	-6.29348	-78.4381	0.00162033	0.048665
GPRC5C	G protein-coupled receptor class C group 5 member C	-6.30646	-79.147	0.000987944	0.0367915
THRAP3	thyroid hormone receptor associated protein 3	-6.31022	-79.3536	0.00147214	0.046185
MLH1	mutL homolog 1	-6.33298	-80.6151	0.00155371	0.0474552
ACP2	acid phosphatase 2, lysosomal	-6.34408	-81.2377	0.00139673	0.0449182
SGCZ	sarcoglycan zeta	-6.34437	-81.2542	0.0014685	0.0461236
DMRT3	doublesex and mab-3 related transcription factor 3	-6.36057	-82.1716	0.000842515	0.0337129
KCNG4	potassium voltage-gated channel modifier subfamily G member 4	-6.36441	-82.3906	0.00156368	0.0476112
CPXM2	carboxypeptidase X, M14 family member 2	-6.36816	-82.6052	0.0013348	0.043781
TJP1	tight junction protein 1	-6.37247	-82.8526	0.00144879	0.0457789
ATP6V1A	ATPase H+ transporting V1 subunit A	-6.37262	-82.8611	0.00108986	0.0389536
CLDN18	claudin 18	-6.39132	-83.9418	0.00158724	0.048031
MFSD14B	major facilitator superfamily domain containing 14B	-6.40639	-84.8236	0.00107577	0.0386658
CRABP2	cellular retinoic acid binding protein 2	-6.41202	-85.155	0.00124003	0.0419275
MKLN1	muskelin 1	-6.41846	-85.5358	0.00156402	0.0476112
PLAUR	plasminogen activator, urokinase receptor	-6.41985	-85.6183	0.00148296	0.0463869
AMOT	angiomotin	-6.43409	-86.4679	0.00163214	0.0487563
M1AP	meiosis 1 associated protein	-6.44903	-87.3677	0.0012816	0.0427406
TYR	tyrosinase	-6.45231	-87.5665	0.00131111	0.0433392
KDELC2	KDEL motif containing 2	-6.47263	-88.8085	0.000736767	0.0311774
ZBTB44	zinc finger and BTB domain containing 44	-6.4768	-89.0656	0.00101981	0.0374849
NRXN1	neurexin 1	-6.49156	-89.9815	0.000901562	0.0349153
MCTP2	multiple C2 and transmembrane domain containing 2	-6.49442	-90.1601	0.00164524	0.0489774
RBMS3	RNA binding motif single stranded interacting protein 3	-6.50478	-90.8103	0.00113881	0.0400093
CEP170B	centrosomal protein 170B	-6.51672	-91.5647	0.00104942	0.0381375
SNRPA1	small nuclear ribonucleoprotein polypeptide A'	-6.52138	-91.861	0.0010804	0.0387817
P3H3	prolyl 3-hydroxylase 3	-6.52322	-91.978	0.000522063	0.0257276
PPL	periplakin	-6.52807	-92.2879	0.000656584	0.0292808
PLEKHA6	pleckstrin homology domain containing A6	-6.54355	-93.2838	0.000892466	0.0347856
LRRN1	leucine rich repeat neuronal 1	-6.5521	-93.8378	0.00142834	0.0454543
PIWIL1	piwi like RNA-mediated gene silencing 1	-6.56301	-94.5505	0.00162961	0.0487448
ARHGAP45	Rho GTPase activating protein 45	-6.56386	-94.6059	0.00137893	0.0445944
CRADD	CASP2 and RIPK1 domain containing adaptor with death domain	-6.56487	-94.6721	0.00122845	0.0416897
ARL6IP4	ADP ribosylation factor like GTPase 6 interacting protein 4	-6.57019	-95.022	0.00112713	0.0397732
MEF2B	myocyte enhancer factor 2B	-6.57709	-95.4776	0.00133909	0.0438416
C20orf27	chromosome 20 open reading frame 27	-6.59018	-96.3475	0.00126892	0.0425067
ZNF383	zinc finger protein 383	-6.59086	-96.3931	0.00110574	0.0392966
SLC26A5	solute carrier family 26 member 5	-6.60285	-97.1978	0.00129149	0.0429475
KNDC1	kinase non-catalytic C-lobe domain containing 1	-6.62206	-98.5008	0.00046404	0.0241224
PREX2	phosphatidylinositol-3,4,5-trisphosphate dependent Rac exchange factor 2	-6.6265	-98.8042	0.00122959	0.0417179
PIP5K1A	phosphatidylinositol-4-phosphate 5-kinase type 1 alpha	-6.62855	-98.9447	0.00105365	0.0382508
LRRTM4	leucine rich repeat transmembrane neuronal 4	-6.62959	-99.0163	0.00105234	0.0382236
TDRD7	tudor domain containing 7	-6.6463	-100.169	0.000893192	0.0347856
NSF	N-ethylmaleimide sensitive factor, vesicle fusing ATPase	-6.65282	-100.623	0.00092395	0.0354131
GDF10	growth differentiation factor 10	-6.65305	-100.639	0.0016986	0.049873
SPATA13	spermatogenesis associated 13	-6.65739	-100.942	0.001345	0.0439805
IGSF21	immunoglobin superfamily member 21	-6.65857	-101.025	0.00116466	0.0404866
RTL8B	retrotransposon Gag like 8B	-6.66025	-101.143	0.000792317	0.0324781
PLCXD3	phosphatidylinositol specific phospholipase C X domain containing 3	-6.67213	-101.979	0.001259	0.0423395
PM20D1	peptidase M20 domain containing 1	-6.67219	-101.983	0.000705994	0.0305248
RASAL2	RAS protein activator like 2	-6.67412	-102.12	0.00107885	0.038736
GBP2	guanylate binding protein 2	-6.67479	-102.168	0.00147295	0.0462001
SCARA5	scavenger receptor class A member 5	-6.68171	-102.658	0.000797566	0.0326446
B3GALT2	beta-1,3-galactosyltransferase 2	-6.68454	-102.86	0.000935848	0.0357321
RAB40C	RAB40C, member RAS oncogene family	-6.6865	-103	0.000896258	0.0348572
GRM8	glutamate metabotropic receptor 8	-6.70699	-104.473	0.00159133	0.0480912
TGM2	transglutaminase 2	-6.70922	-104.635	0.000841497	0.0336903
SEC16B	SEC16 homolog B, endoplasmic reticulum export factor	-6.72026	-105.439	0.0011121	0.0394353
OR52I1	olfactory receptor family 52 subfamily I member 1	-6.73844	-106.775	0.000624271	0.028402
PPM1D	protein phosphatase, Mg2+/Mn2+ dependent 1D	-6.74804	-107.488	0.00107082	0.0385787
CLDN34	claudin 34	-6.75426	-107.953	0.00150862	0.0467564
FRG1	FSHD region gene 1	-6.76144	-108.491	0.000949489	0.0359707
ENO4	enolase 4	-6.76263	-108.582	0.00169891	0.049873
RFWD3	ring finger and WD repeat domain 3	-6.77188	-109.279	0.00157776	0.04786
DCTN5	dynactin subunit 5	-6.78869	-110.56	0.00129331	0.0429643
PCMT1	protein-L-isoaspartate (D-aspartate) O-methyltransferase	-6.78982	-110.647	0.00111008	0.0393738
C3orf70	chromosome 3 open reading frame 70	-6.79351	-110.93	0.00052864	0.0259193
BORCS8	BLOC-1 related complex subunit 8	-6.79916	-111.366	0.00129071	0.0429332
WNT4	Wnt family member 4	-6.80242	-111.618	0.000907766	0.0350519
SORCS2	sortilin related VPS10 domain containing receptor 2	-6.80369	-111.716	0.000837219	0.0335777
TAB1	TGF-beta activated kinase 1 (MAP3K7) binding protein 1	-6.81156	-112.327	0.00135562	0.0441834
PCDH12	protocadherin 12	-6.81263	-112.411	0.00145935	0.0459201
TRPM5	transient receptor potential cation channel subfamily M member 5	-6.81898	-112.906	0.00049923	0.0250915
AHNAK2	AHNAK nucleoprotein 2	-6.82297	-113.219	0.000851904	0.033892
MAN2A2	mannosidase alpha class 2A member 2	-6.83434	-114.115	0.000495168	0.0249571
SCN4A	sodium voltage-gated channel alpha subunit 4	-6.83714	-114.337	0.00121687	0.0414433
NLRP5	NLR family pyrin domain containing 5	-6.83927	-114.505	0.0015927	0.0481114
ARMC9	armadillo repeat containing 9	-6.83946	-114.52	0.000710446	0.0306294
KCNK5	potassium two pore domain channel subfamily K member 5	-6.83998	-114.561	0.00142066	0.0453353
KCNC3	potassium voltage-gated channel subfamily C member 3	-6.84054	-114.606	0.00156284	0.0476072
GRIK2	glutamate ionotropic receptor kainate type subunit 2	-6.84126	-114.663	0.00130849	0.0432629
RALGAPA2	Ral GTPase activating protein catalytic alpha subunit 2	-6.8447	-114.937	0.000754737	0.0316225
PA2G4	proliferation-associated 2G4	-6.84552	-115.002	0.00113861	0.0400093
SMAD9	SMAD family member 9	-6.85356	-115.645	0.000875748	0.0344978
CNOT8	CCR4-NOT transcription complex subunit 8	-6.8541	-115.688	0.000909883	0.0350528
IQSEC2	IQ motif and Sec7 domain 2	-6.86153	-116.286	0.000619991	0.0283197
TMEM231	transmembrane protein 231	-6.86246	-116.361	0.000855338	0.033986
ATRX	ATRX, chromatin remodeler	-6.86422	-116.502	0.00154396	0.0472833
RANBP9	RAN binding protein 9	-6.8677	-116.784	0.000537272	0.0261676
RAI2	retinoic acid induced 2	-6.88562	-118.244	0.000599684	0.027816
PIM2	Pim-2 proto-oncogene, serine/threonine kinase	-6.89332	-118.877	0.000421647	0.0230063
COL2A1	collagen type II alpha 1 chain	-6.90182	-119.579	0.00167564	0.0494539
CNTD2	cyclin N-terminal domain containing 2	-6.90328	-119.7	0.00162583	0.0487246
SRRM2	serine/arginine repetitive matrix 2	-6.91405	-120.597	0.0015209	0.0469258
TMC2	transmembrane channel like 2	-6.92316	-121.361	0.00101042	0.0373222
RAB8B	RAB8B, member RAS oncogene family	-6.92694	-121.679	0.00062258	0.028381
RNF223	ring finger protein 223	-6.93047	-121.977	0.000556859	0.0266308
PARP16	poly(ADP-ribose) polymerase family member 16	-6.93371	-122.252	0.00139246	0.044863
LSAMP	limbic system associated membrane protein	-6.9352	-122.378	0.000449394	0.0238335
VEPH1	ventricular zone expressed PH domain containing 1	-6.93878	-122.682	0.00146238	0.0459733
AFAP1L1	actin filament associated protein 1 like 1	-6.94437	-123.159	0.000816989	0.033042
CNTN1	contactin 1	-6.9585	-124.37	0.000533322	0.026049
EGFL7	EGF like domain multiple 7	-6.96062	-124.553	0.000520962	0.0257011
PFKFB4	6-phosphofructo-2-kinase/fructose-2,6-biphosphatase 4	-6.96467	-124.903	0.00103274	0.0378215
PRB4	proline rich protein BstNI subfamily 4	-6.96825	-125.214	0.0014123	0.0451633
MED20	mediator complex subunit 20	-6.97056	-125.414	0.00150244	0.0466522
TTN	titin	-6.9747	-125.775	0.00123198	0.0417808
LRMP	lymphoid restricted membrane protein	-6.97807	-126.069	0.000427002	0.0231972
EFNA2	ephrin A2	-6.97809	-126.071	0.00130316	0.0431907
CCDC69	coiled-coil domain containing 69	-6.97841	-126.099	0.000801379	0.0327563
C3orf38	chromosome 3 open reading frame 38	-6.99423	-127.489	0.000880429	0.0345742
ANO3	anoctamin 3	-6.99738	-127.767	0.000716373	0.0307528
MIOX	myo-inositol oxygenase	-6.99814	-127.835	0.00164116	0.0489089
IKZF1	IKAROS family zinc finger 1	-6.9986	-127.876	0.00136589	0.0443513
SS18L1	SS18L1, nBAF chromatin remodeling complex subunit	-7.00269	-128.239	0.00119903	0.0412101
RAP1GDS1	Rap1 GTPase-GDP dissociation stimulator 1	-7.00393	-128.35	0.000909161	0.0350528
F13A1	coagulation factor XIII A chain	-7.00568	-128.505	0.00131896	0.0434731
RRAS	RAS related	-7.00738	-128.656	0.00104389	0.0380272
CORO1B	coronin 1B	-7.01586	-129.414	0.000574772	0.0271941
TAL1	TAL bHLH transcription factor 1, erythroid differentiation factor	-7.01759	-129.571	0.000410935	0.0226829
FOXB1	forkhead box B1	-7.02354	-130.106	0.000255329	0.0176349
SEC14L1	SEC14 like lipid binding 1	-7.02831	-130.537	0.000763855	0.0318047
CKS2	CDC28 protein kinase regulatory subunit 2	-7.03131	-130.808	0.00103614	0.0378956
FAM184A	family with sequence similarity 184 member A	-7.03633	-131.264	0.00146113	0.0459447
PHC1	polyhomeotic homolog 1	-7.039	-131.507	0.000324358	0.0199557
CIPC	CLOCK interacting pacemaker	-7.03965	-131.567	0.00149745	0.0466385
E2F8	E2F transcription factor 8	-7.04788	-132.32	0.0011059	0.0392966
GP1BA	glycoprotein Ib platelet subunit alpha	-7.04836	-132.364	0.00107207	0.0386035
SCYL1	SCY1 like pseudokinase 1	-7.05669	-133.13	0.00155933	0.0475421
TTBK1	tau tubulin kinase 1	-7.05775	-133.228	0.00135858	0.0442002
PATJ	PATJ, crumbs cell polarity complex component	-7.05822	-133.271	0.000575227	0.0271977
MYPN	myopalladin	-7.05912	-133.354	0.000605465	0.0279535
PLOD1	procollagen-lysine,2-oxoglutarate 5-dioxygenase 1	-7.06026	-133.46	0.00140354	0.0450042
CACNB3	calcium voltage-gated channel auxiliary subunit beta 3	-7.06274	-133.69	0.00118347	0.0409313
CDS2	CDP-diacylglycerol synthase 2	-7.06865	-134.238	0.000804874	0.0328131
DTNB	dystrobrevin beta	-7.07215	-134.564	0.000783377	0.032256
CHCHD7	coiled-coil-helix-coiled-coil-helix domain containing 7	-7.07349	-134.689	0.0011766	0.040802
LPP	LIM domain containing preferred translocation partner in lipoma	-7.08081	-135.374	0.00119028	0.0410945
DHX9	DExH-box helicase 9	-7.08463	-135.733	0.000977225	0.036538
AGBL5	ATP/GTP binding protein like 5	-7.08654	-135.913	0.00113504	0.0399283
PODN	podocan	-7.08839	-136.088	0.00113114	0.0398638
HGSNAT	heparan-alpha-glucosaminide N-acetyltransferase	-7.09033	-136.27	0.000639326	0.0287915
ZNF214	zinc finger protein 214	-7.09063	-136.299	0.000439892	0.0235926
SCPEP1	serine carboxypeptidase 1	-7.09073	-136.309	0.000448519	0.0238194
GCC1	GRIP and coiled-coil domain containing 1	-7.09107	-136.34	0.00163127	0.0487448
ECE2	endothelin converting enzyme 2	-7.09132	-136.364	0.00168863	0.0497155
SRSF5	serine and arginine rich splicing factor 5	-7.09527	-136.738	0.00120773	0.0413437
UNC45B	unc-45 myosin chaperone B	-7.09913	-137.104	0.00157418	0.0477759
AQP8	aquaporin 8	-7.10367	-137.537	0.000262931	0.0180061
EMG1	EMG1, N1-specific pseudouridine methyltransferase	-7.10383	-137.551	0.0014047	0.0450042
APCDD1	APC down-regulated 1	-7.10416	-137.583	0.00164764	0.0489919
PDX1	pancreatic and duodenal homeobox 1	-7.11685	-138.799	0.00155343	0.0474552
ZFYVE9	zinc finger FYVE-type containing 9	-7.12129	-139.226	0.000479051	0.0245671
WLS	wntless Wnt ligand secretion mediator	-7.12546	-139.629	0.000915674	0.0352137
AGRN	agrin	-7.12992	-140.062	0.000243254	0.0171808
TCF25	transcription factor 25	-7.13248	-140.311	0.00162352	0.0487104
SLC6A4	solute carrier family 6 member 4	-7.13288	-140.35	0.000768304	0.0318818
TRMT10C	tRNA methyltransferase 10C, mitochondrial RNase P subunit	-7.13652	-140.704	0.000374123	0.021515
FUZ	fuzzy planar cell polarity protein	-7.14068	-141.11	0.000643476	0.0289215
ODF2L	outer dense fiber of sperm tails 2 like	-7.14107	-141.149	0.00155792	0.0475308
CRYBB1	crystallin beta B1	-7.14234	-141.273	0.000998502	0.0370257
RIOX1	ribosomal oxygenase 1	-7.14565	-141.597	0.00106428	0.0384817
MAP2	microtubule associated protein 2	-7.15083	-142.107	0.00130657	0.0432432
RYR1	ryanodine receptor 1	-7.15192	-142.214	0.00131869	0.0434731
ABCE1	ATP binding cassette subfamily E member 1	-7.15278	-142.299	0.00102209	0.0375143
B4GALT3	beta-1,4-galactosyltransferase 3	-7.15348	-142.368	0.000386436	0.0218626
DNTTIP1	deoxynucleotidyltransferase terminal interacting protein 1	-7.15508	-142.526	0.000767861	0.0318749
LRIT3	leucine rich repeat, Ig-like and transmembrane domains 3	-7.15759	-142.774	0.000343471	0.0205879
ATG13	autophagy related 13	-7.16391	-143.401	0.00119028	0.0410945
FOXI1	forkhead box I1	-7.16836	-143.843	0.000234488	0.0169004
HINT1	histidine triad nucleotide binding protein 1	-7.17423	-144.43	0.00135749	0.044192
VPS54	VPS54, GARP complex subunit	-7.18118	-145.128	0.00108603	0.0389078
PRKAR1A	protein kinase cAMP-dependent type I regulatory subunit alpha	-7.18159	-145.169	0.000601305	0.0278541
SRGN	serglycin	-7.18517	-145.53	0.000670603	0.0296654
GNAS	GNAS complex locus	-7.1888	-145.896	0.000392842	0.0220743
PHKG1	phosphorylase kinase catalytic subunit gamma 1	-7.1909	-146.109	0.0014552	0.0458525
SLC5A6	solute carrier family 5 member 6	-7.19213	-146.233	0.00120062	0.0412442
CMTM4	CKLF like MARVEL transmembrane domain containing 4	-7.19351	-146.374	0.000408117	0.0225909
ARHGEF9	Cdc42 guanine nucleotide exchange factor 9	-7.19746	-146.774	0.000544251	0.0262839
NPRL2	NPR2 like, GATOR1 complex subunit	-7.19885	-146.917	0.00144858	0.0457789
KIF20A	kinesin family member 20A	-7.20034	-147.068	0.00033615	0.0203085
GCK	glucokinase	-7.20059	-147.093	0.000745062	0.0314021
ZNF17	zinc finger protein 17	-7.2026	-147.298	0.000610961	0.0281034
MFSD6	major facilitator superfamily domain containing 6	-7.20721	-147.77	0.00110493	0.0392966
C1ORF158	chromosome 1 open reading frame 158	-7.21112	-148.171	0.000210449	0.0159036
SLC6A19	solute carrier family 6 member 19	-7.21534	-148.605	0.000568547	0.0270299
MPP5	membrane palmitoylated protein 5	-7.21585	-148.658	0.00110958	0.0393738
BTNL10	butyrophilin like 10	-7.22132	-149.223	0.00166529	0.0492753
AKT1	AKT serine/threonine kinase 1	-7.22161	-149.252	0.000505565	0.0252709
CDH16	cadherin 16	-7.23238	-150.371	0.000353316	0.020871
RGS11	regulator of G protein signaling 11	-7.2349	-150.634	0.000901004	0.0349035
ZFHX4	zinc finger homeobox 4	-7.23931	-151.094	0.000412982	0.0227594
GABRB1	gamma-aminobutyric acid type A receptor beta1 subunit	-7.23989	-151.156	0.00116369	0.0404858
[truncated: 1,251 more rows]
